# Supplementary material
Source: PubMed Central journal article supplement (PMC6071719)

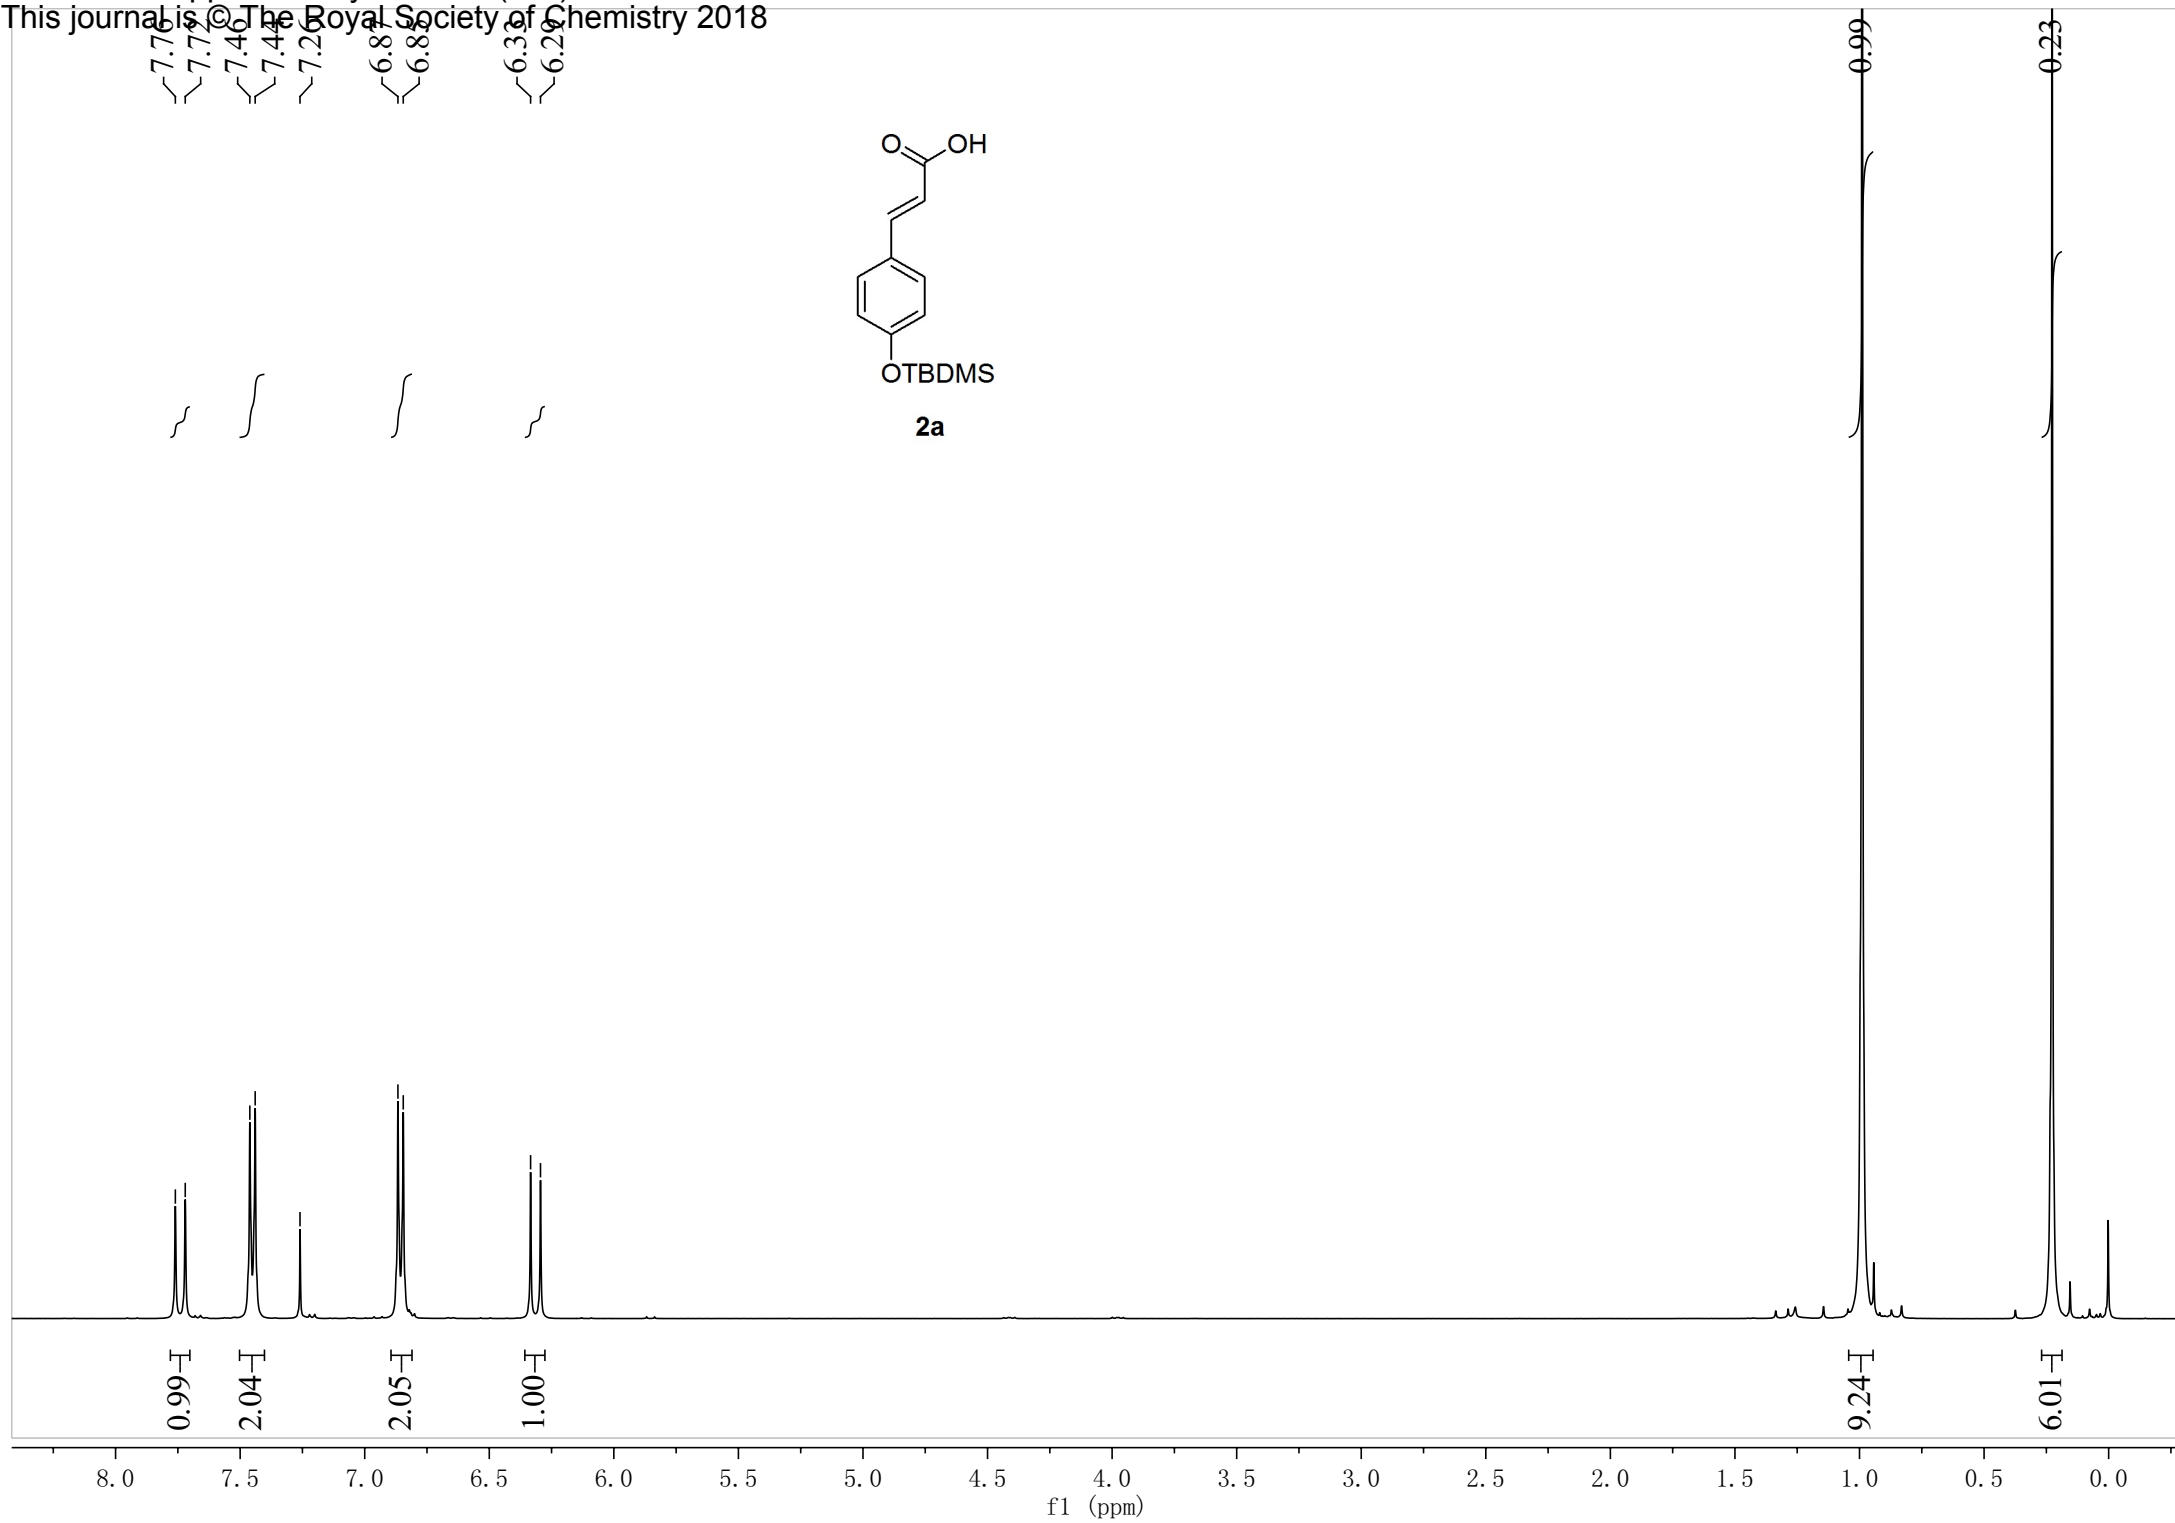

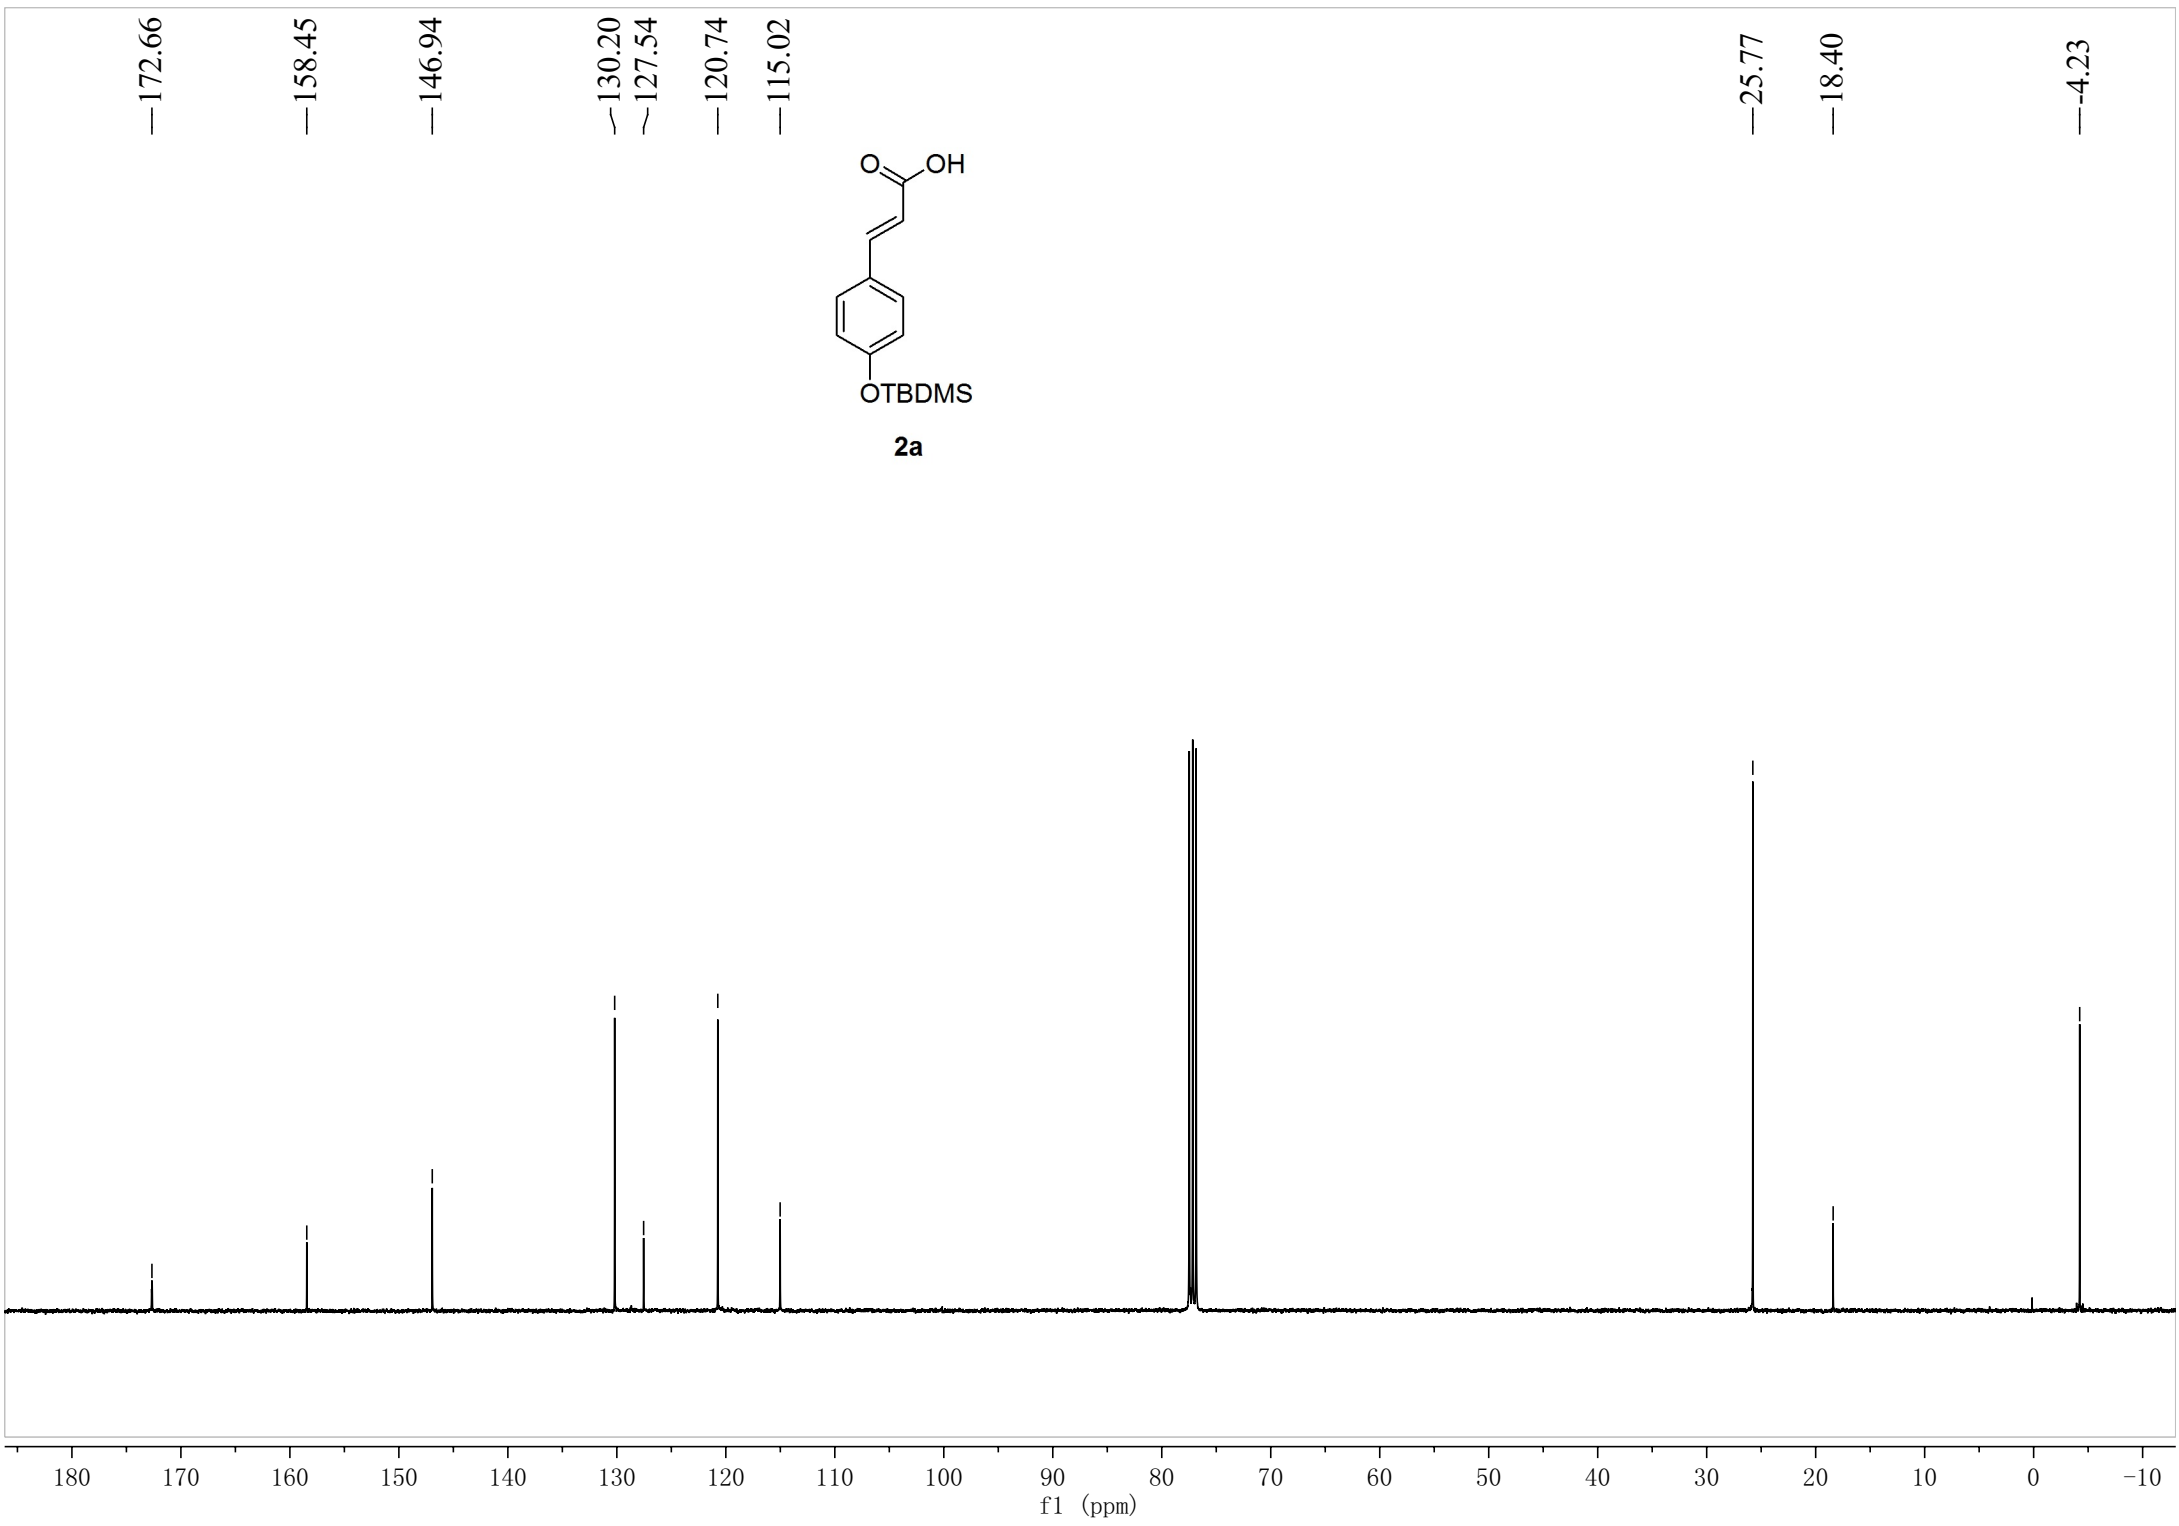

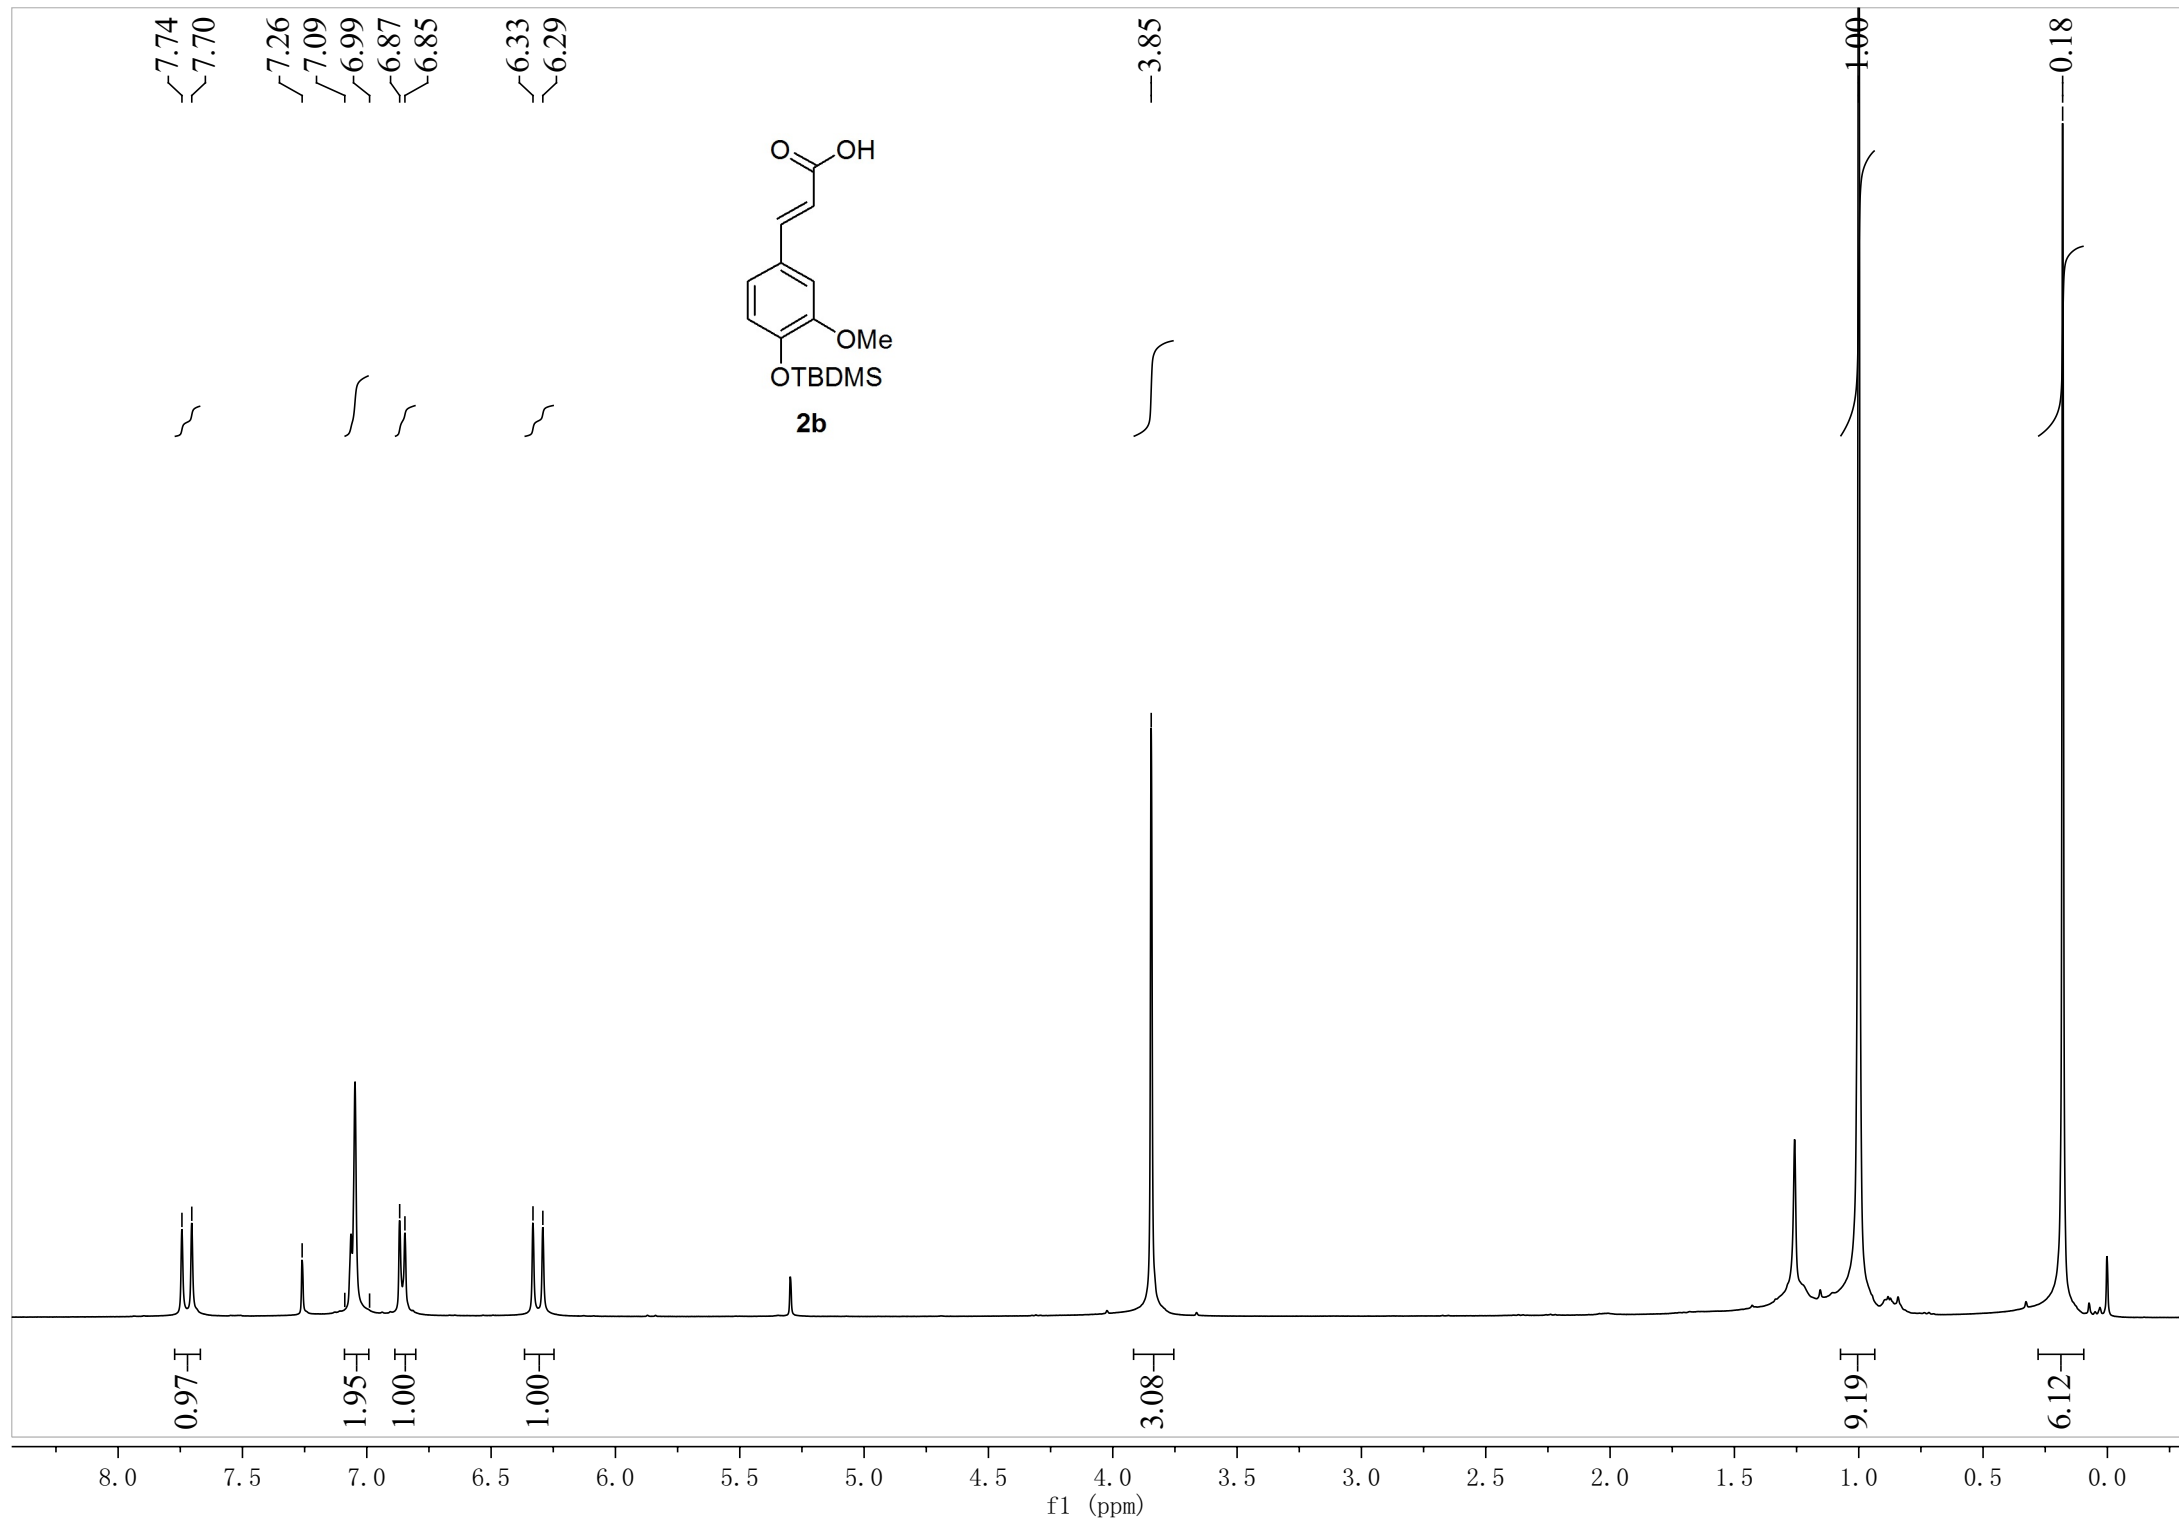

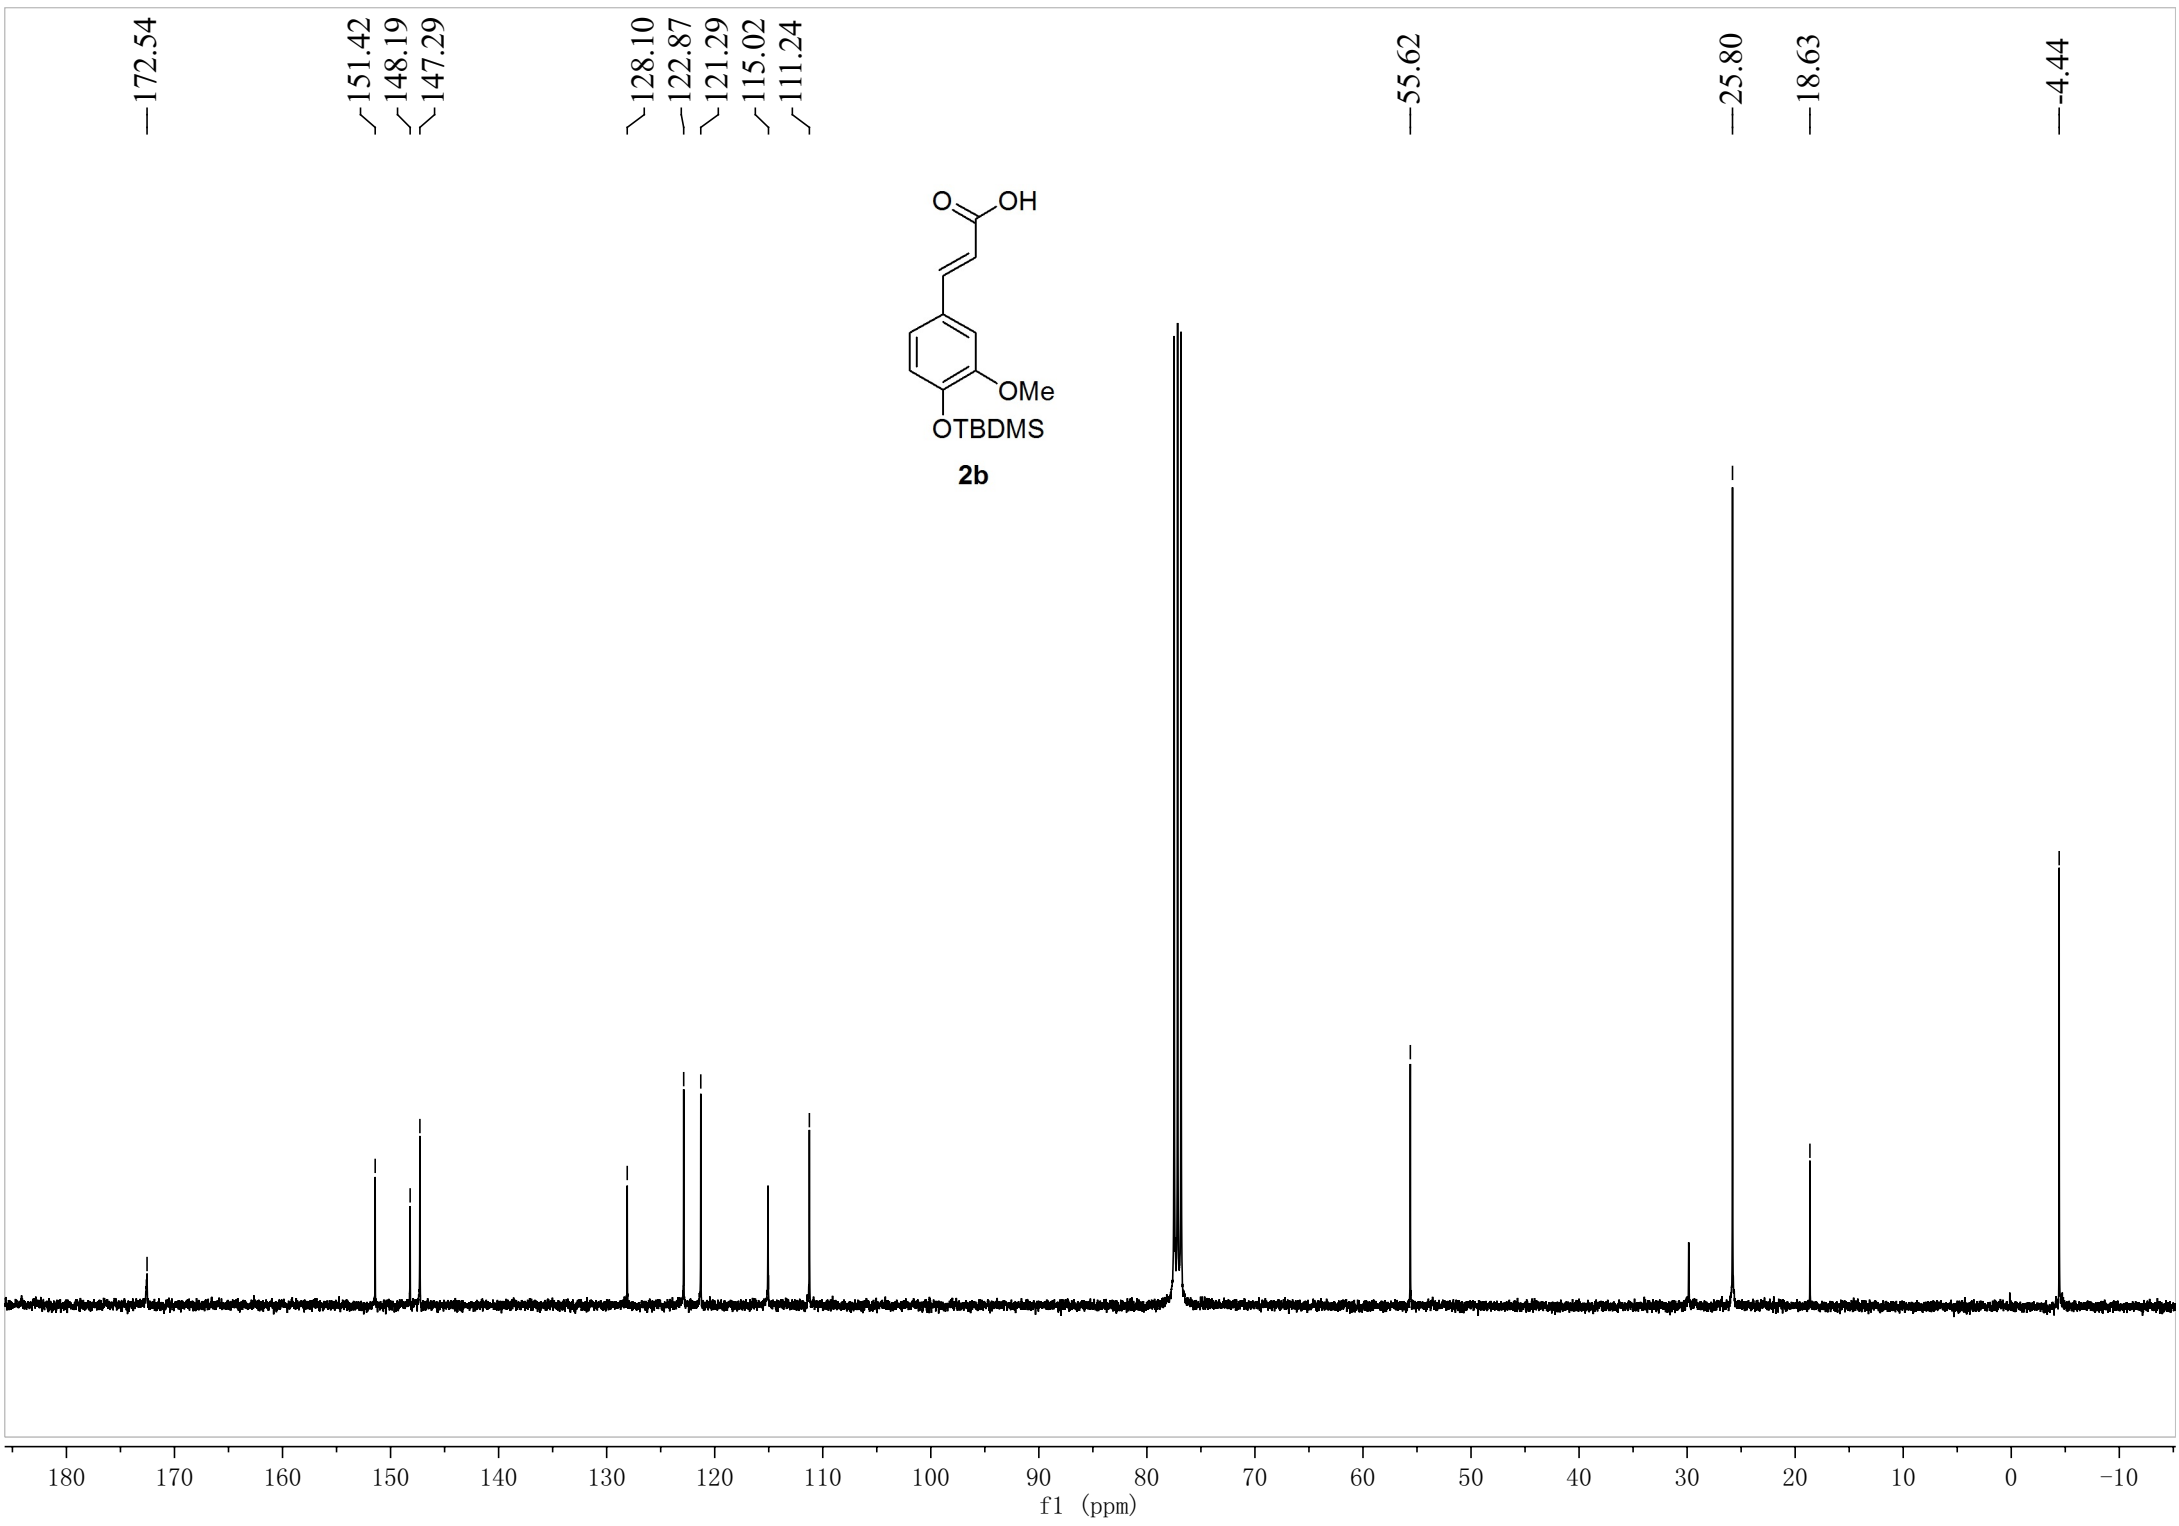

~7.91  
~7.78  
7.51  
7.49  
~7.26  
6.92  
6.80  
6.68  
6.68  
6.56  
6.52

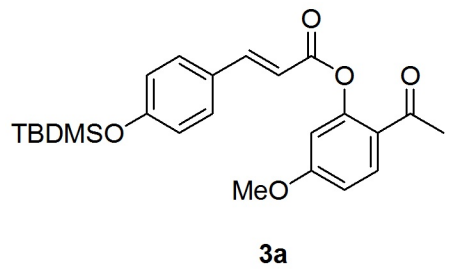

—3.86  
—2.52  
—1.55  
1.00  
—0.24  
—0.00

1.98  
1.99  
3.00  
1.04  
1.01

3.06  
3.00  
9.19  
6.07

8.5 8.0 7.5 7.0 6.5 6.0 5.5 5.0 4.5 4.0 3.5 3.0 2.5 2.0 1.5 1.0 0.5 0.0

f1 (ppm)

—196.03

~165.57

~163.83

~158.59

~151.74

~147.29

~132.34

~130.30

~127.55

~124.00

~120.77

~114.58

~112.03

~109.25

—55.86

~29.83

~25.77

~18.41

—-4.21

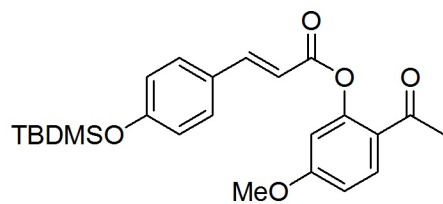

**3a**

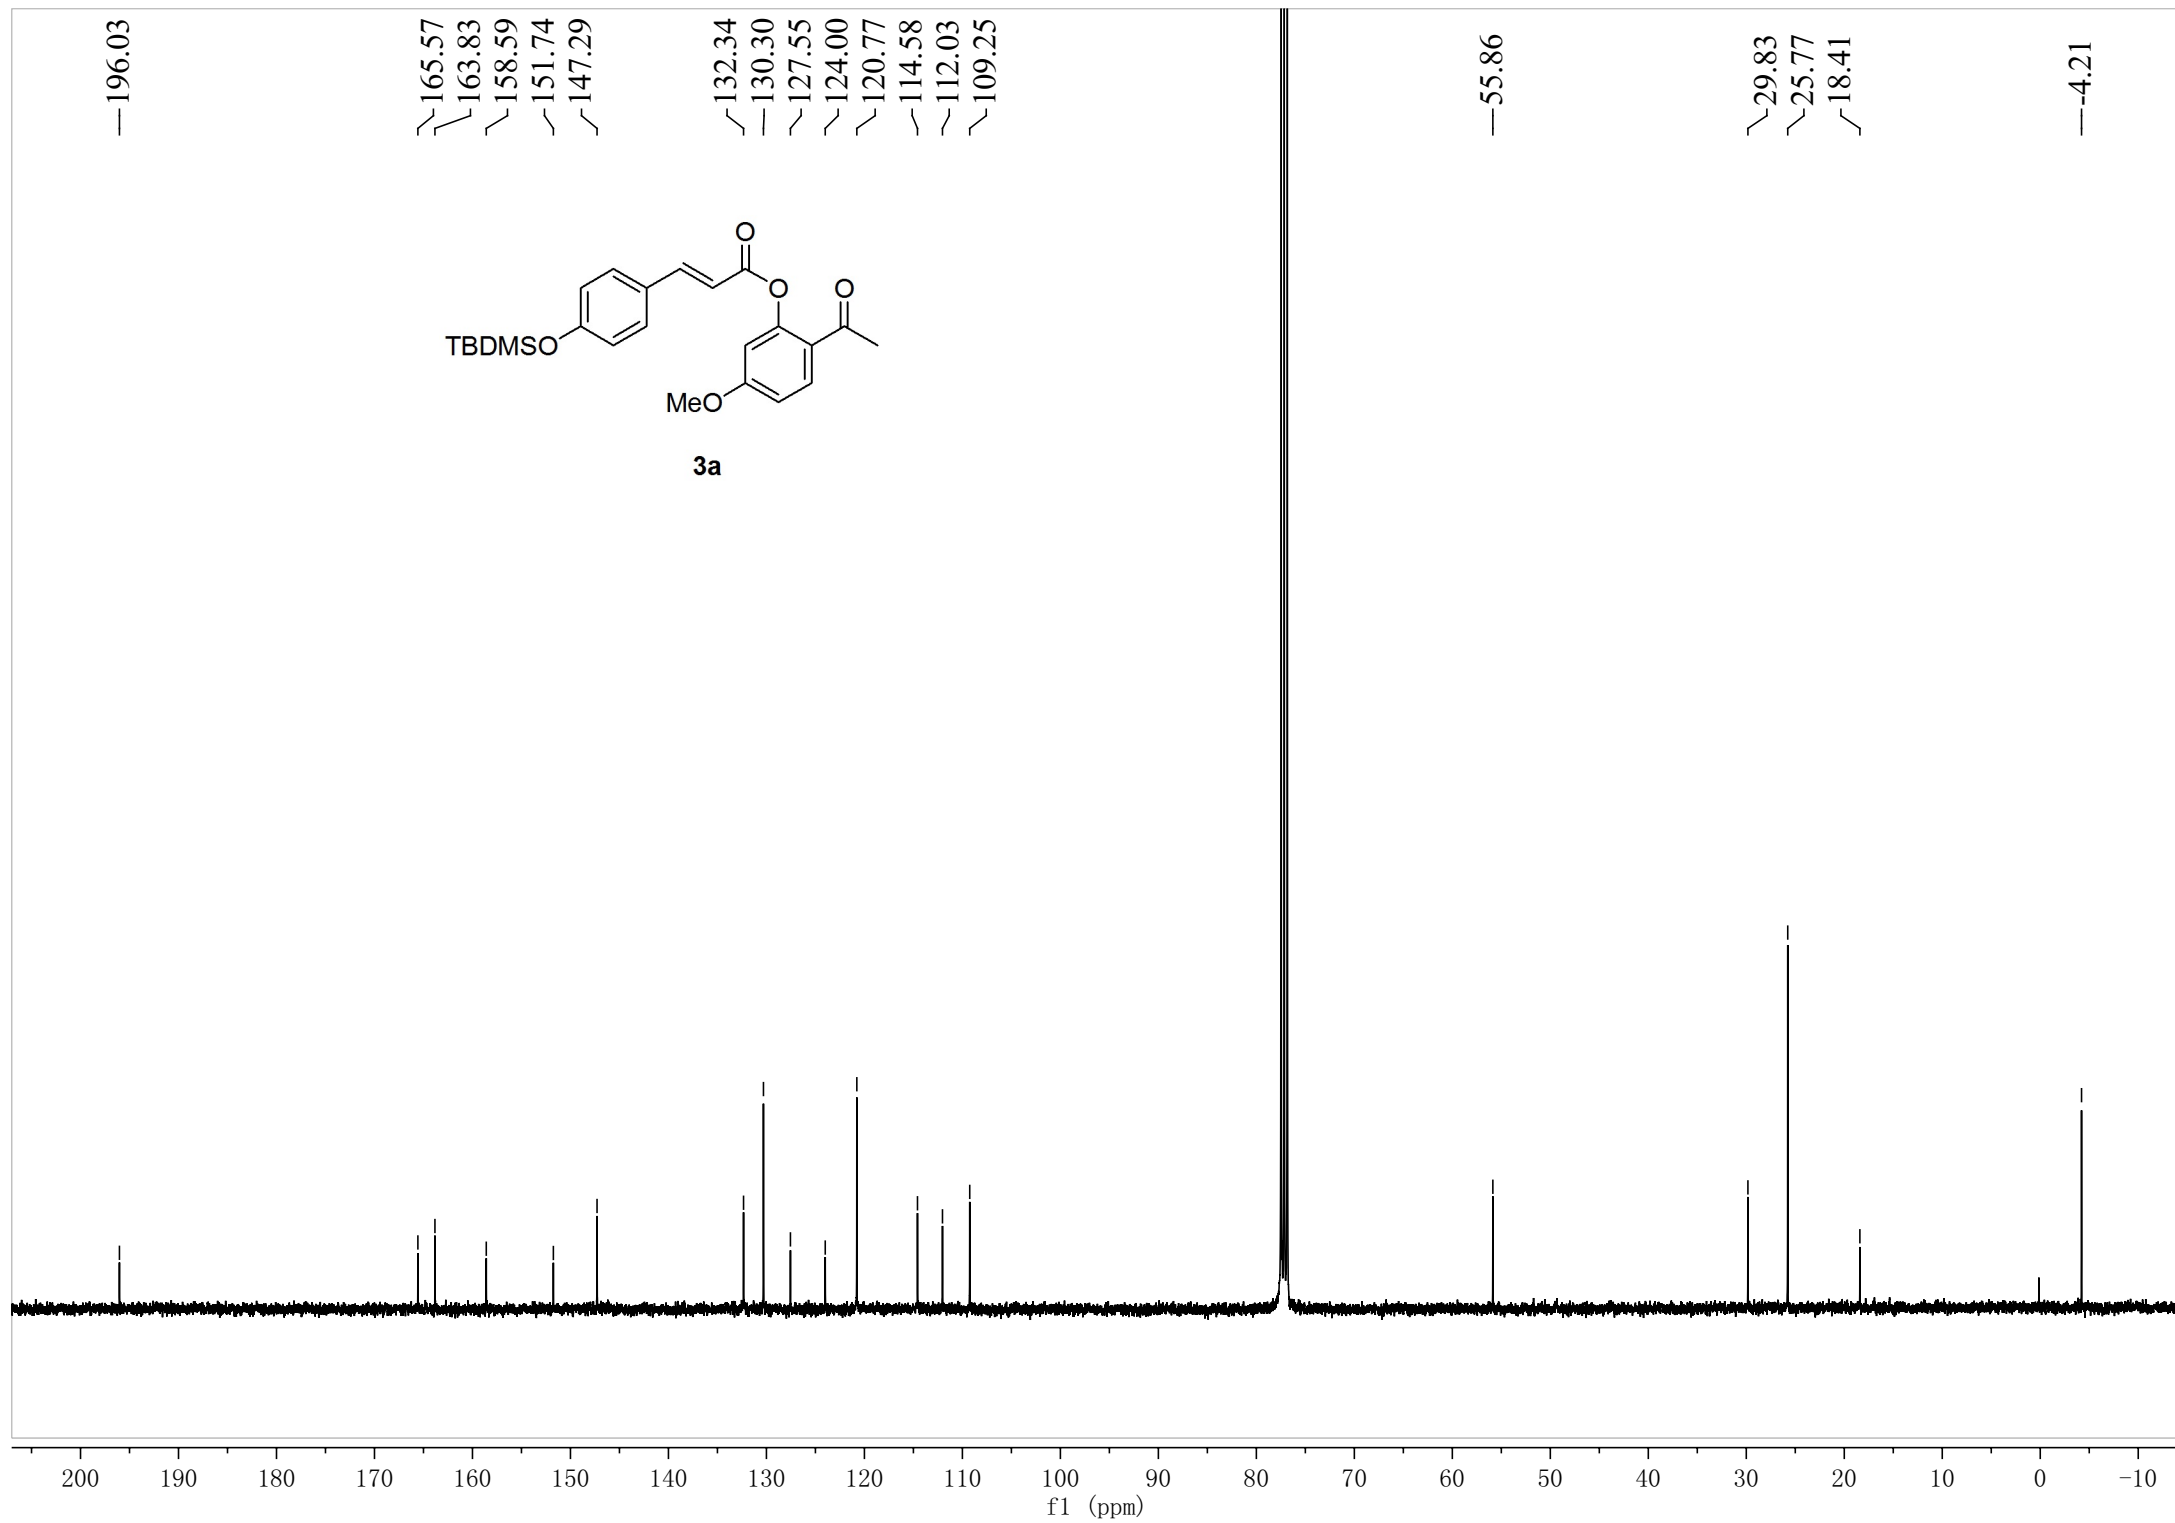

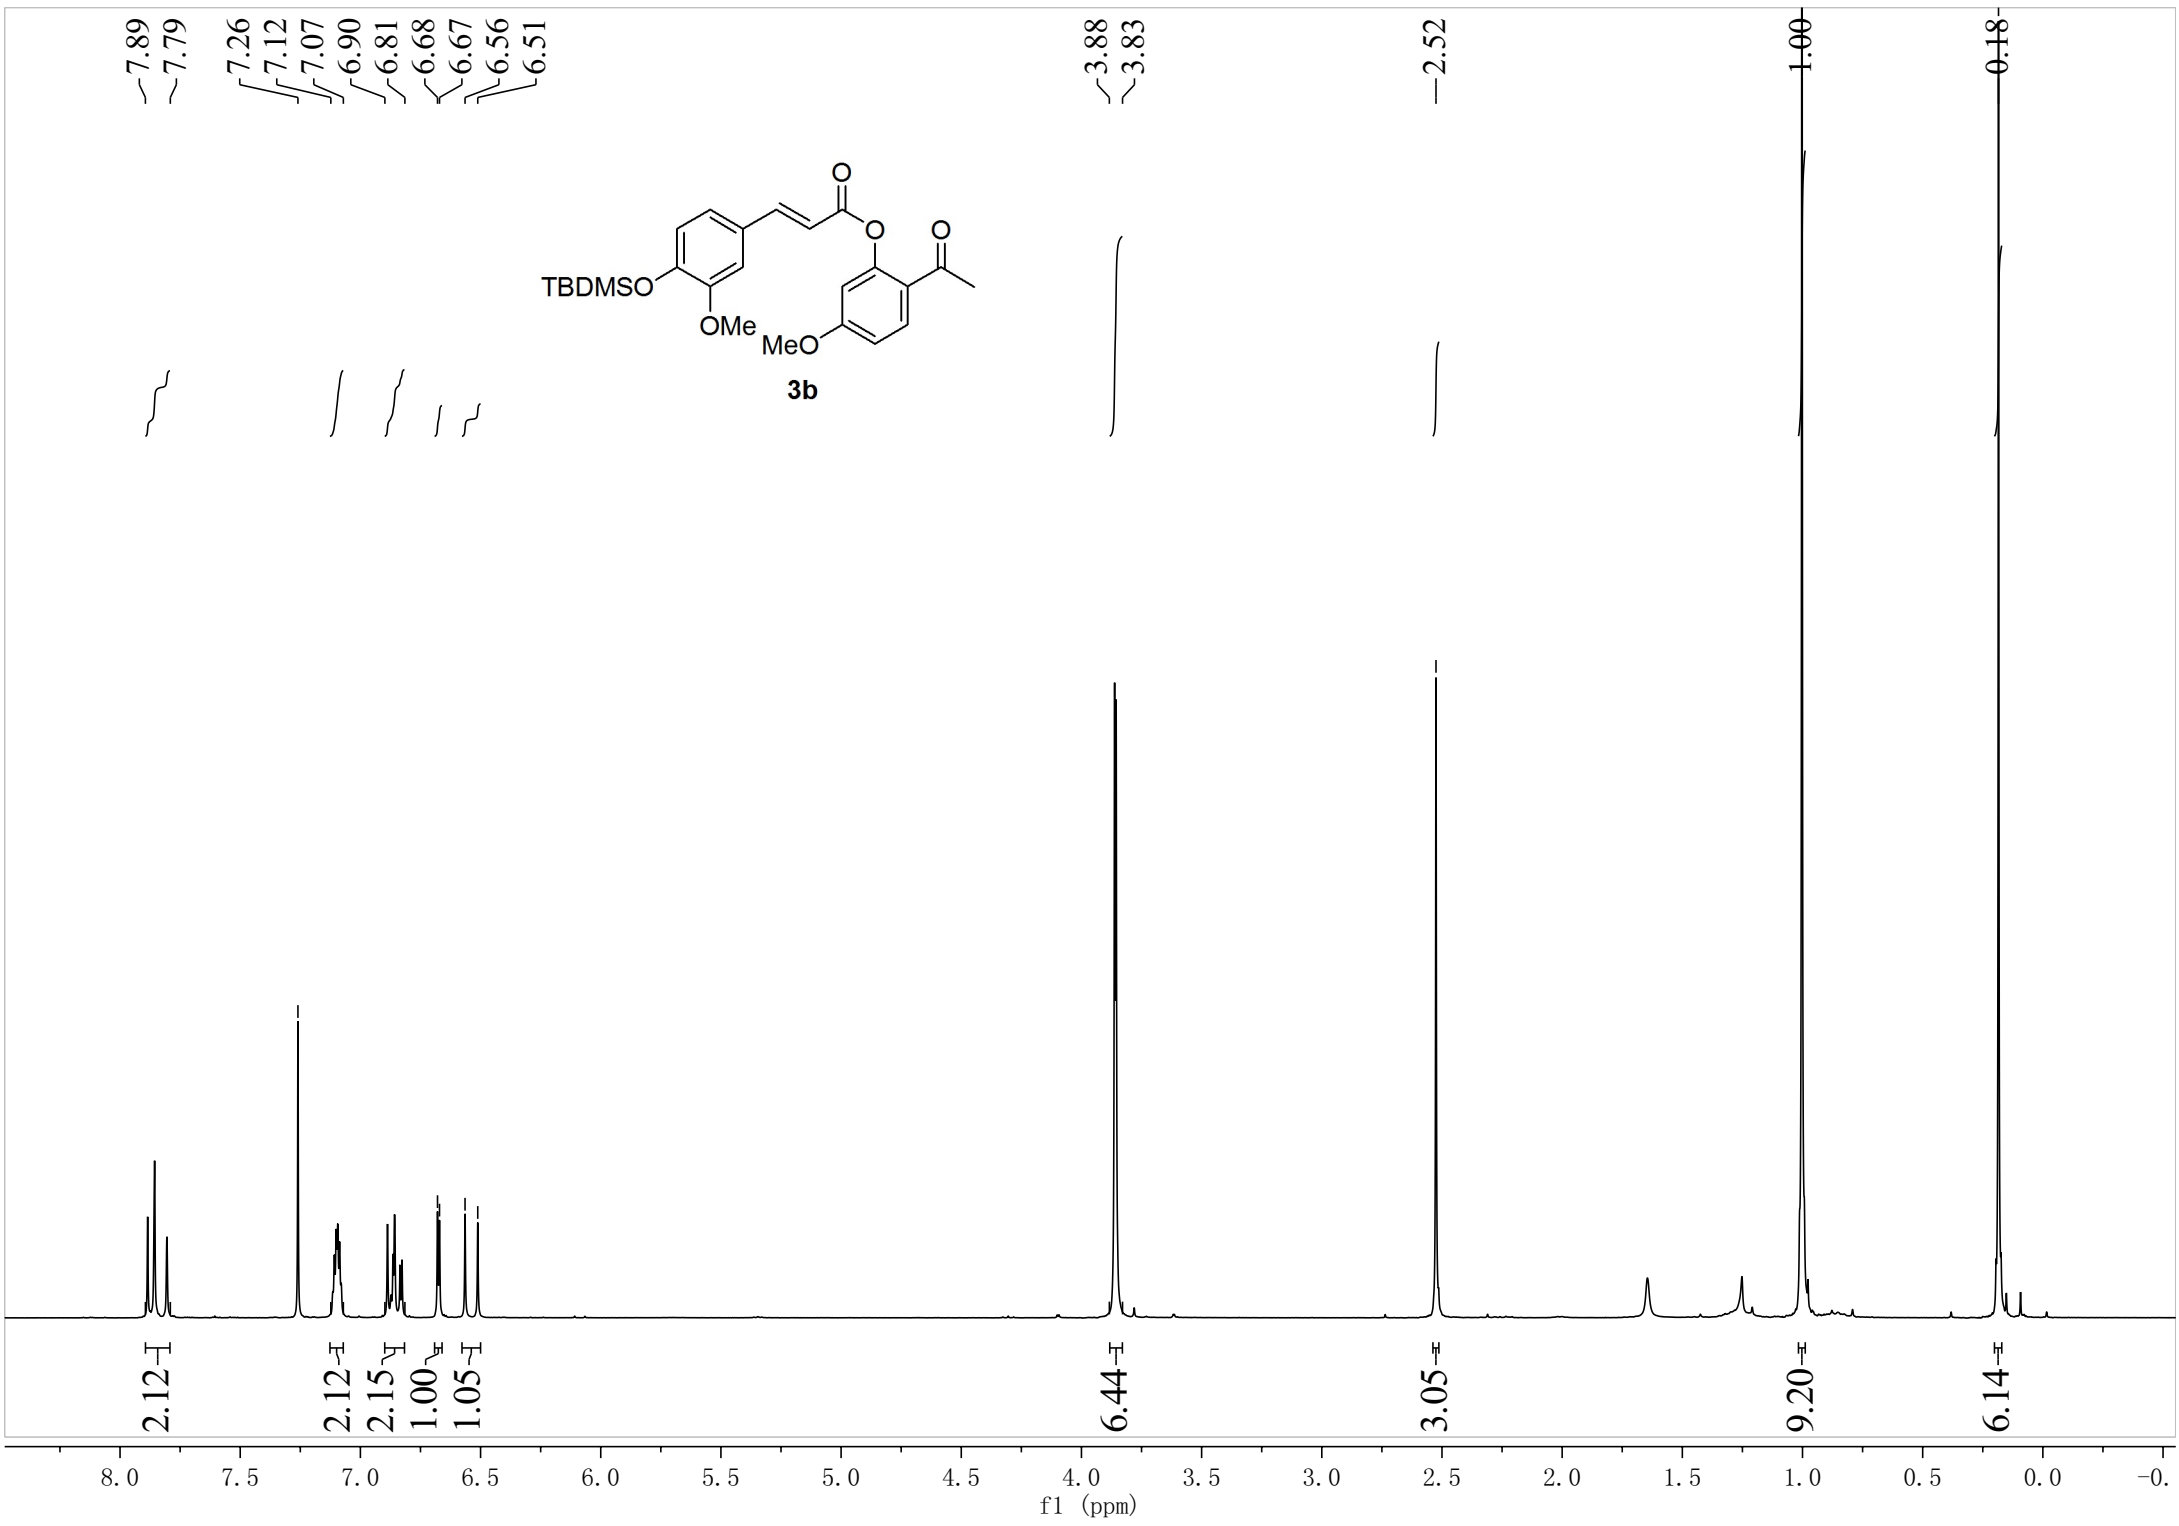

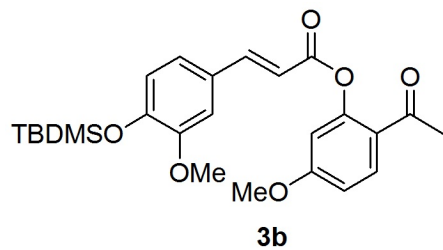

—196.07

~165.58  
~163.82

~151.70  
~151.40  
~148.26  
~147.63

~132.38  
~128.07  
~123.86  
~123.01  
~121.29  
~114.57  
~111.98  
~111.18  
~109.27

~55.86  
~55.61

~29.80  
~25.79  
~18.64

—-4.44

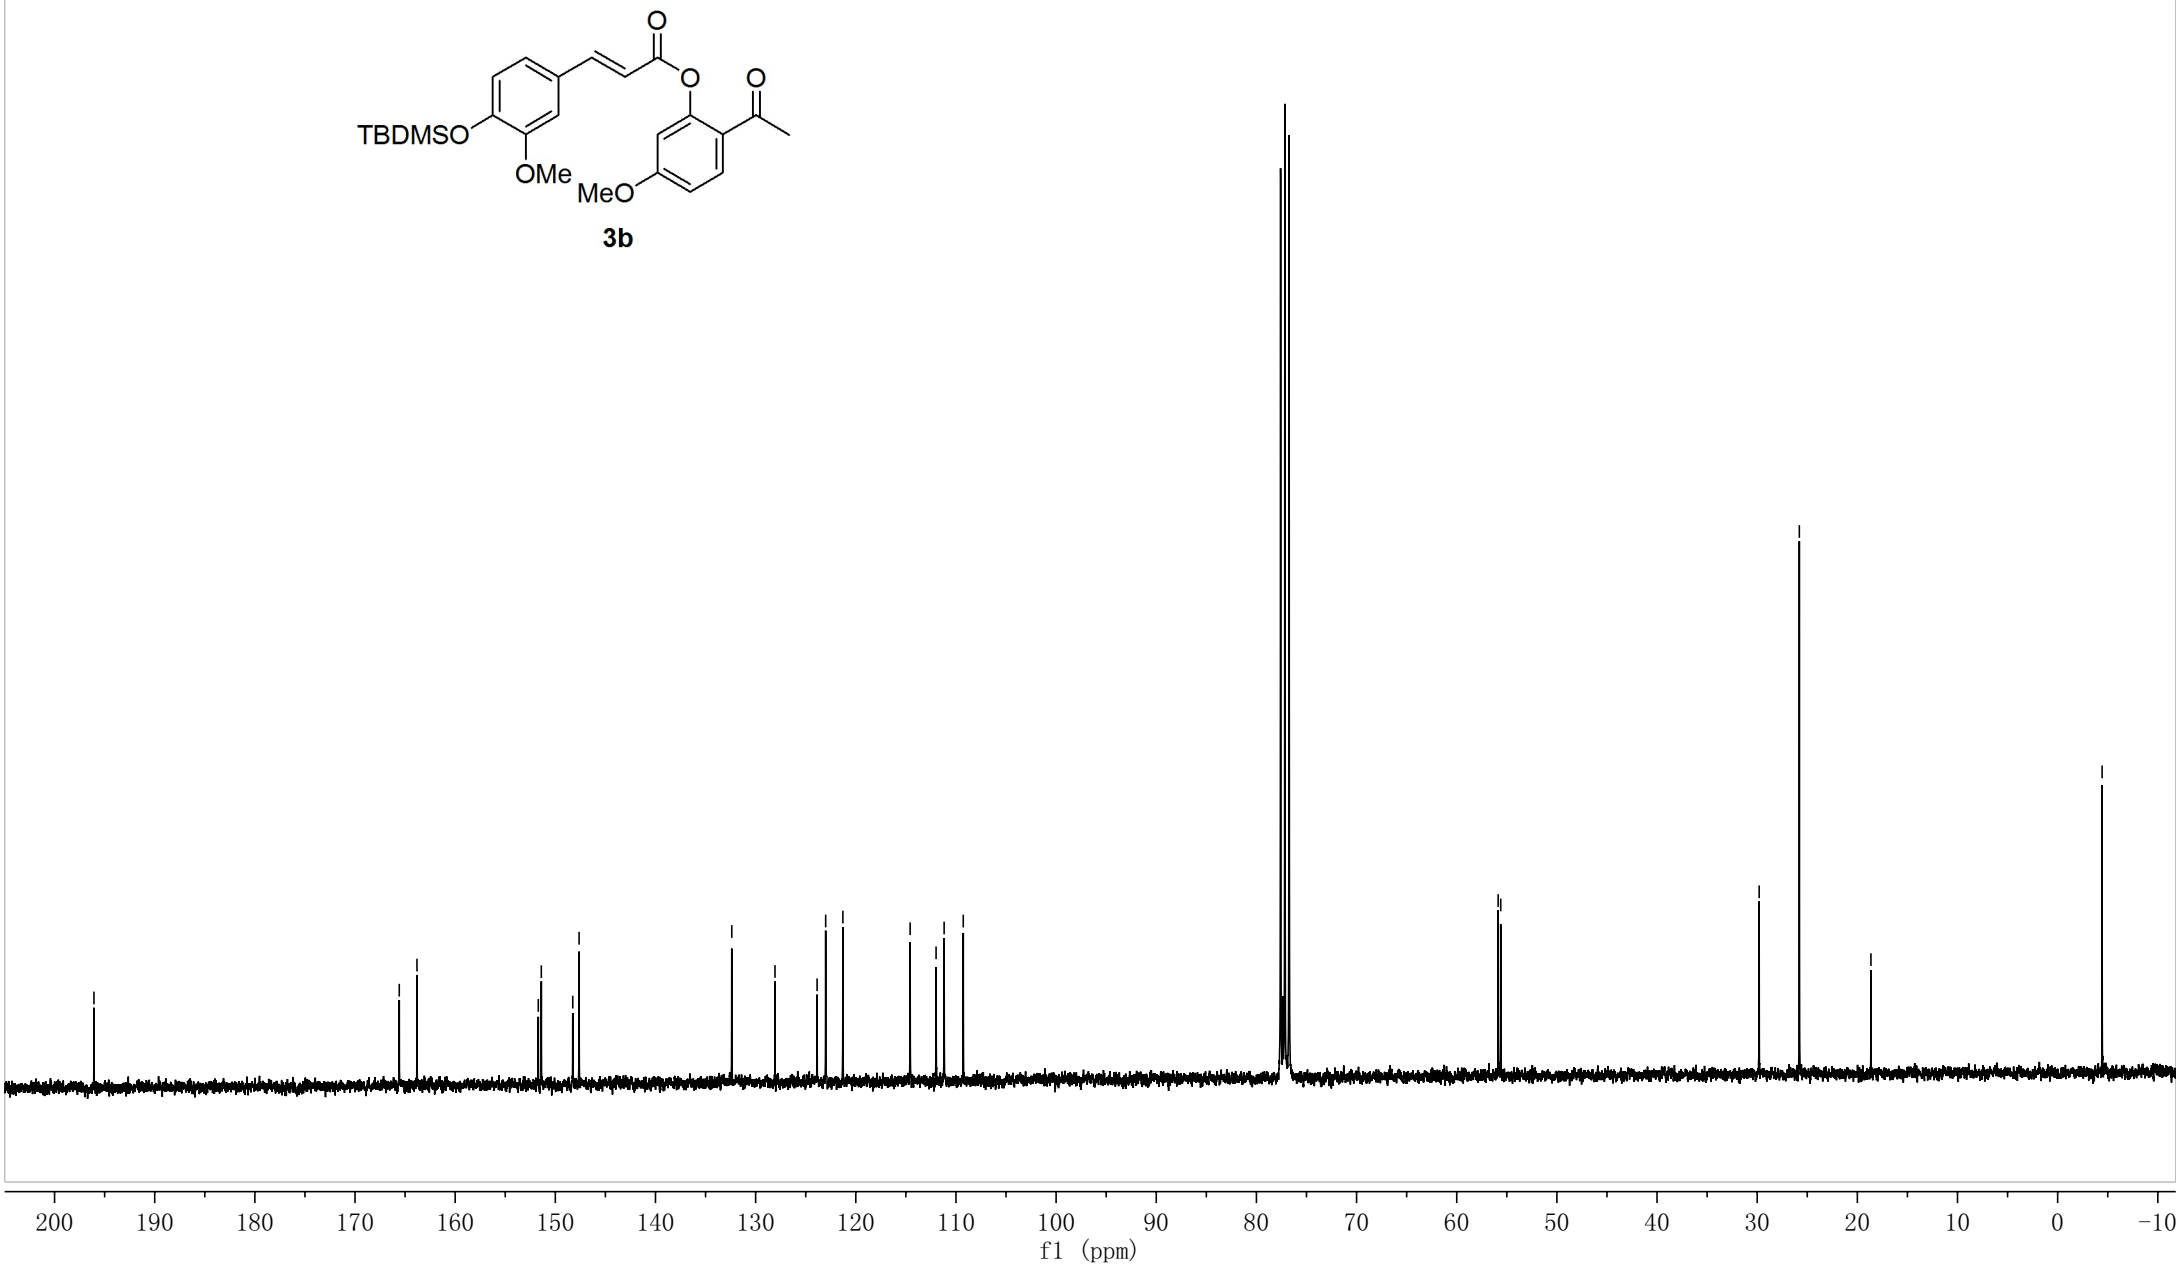



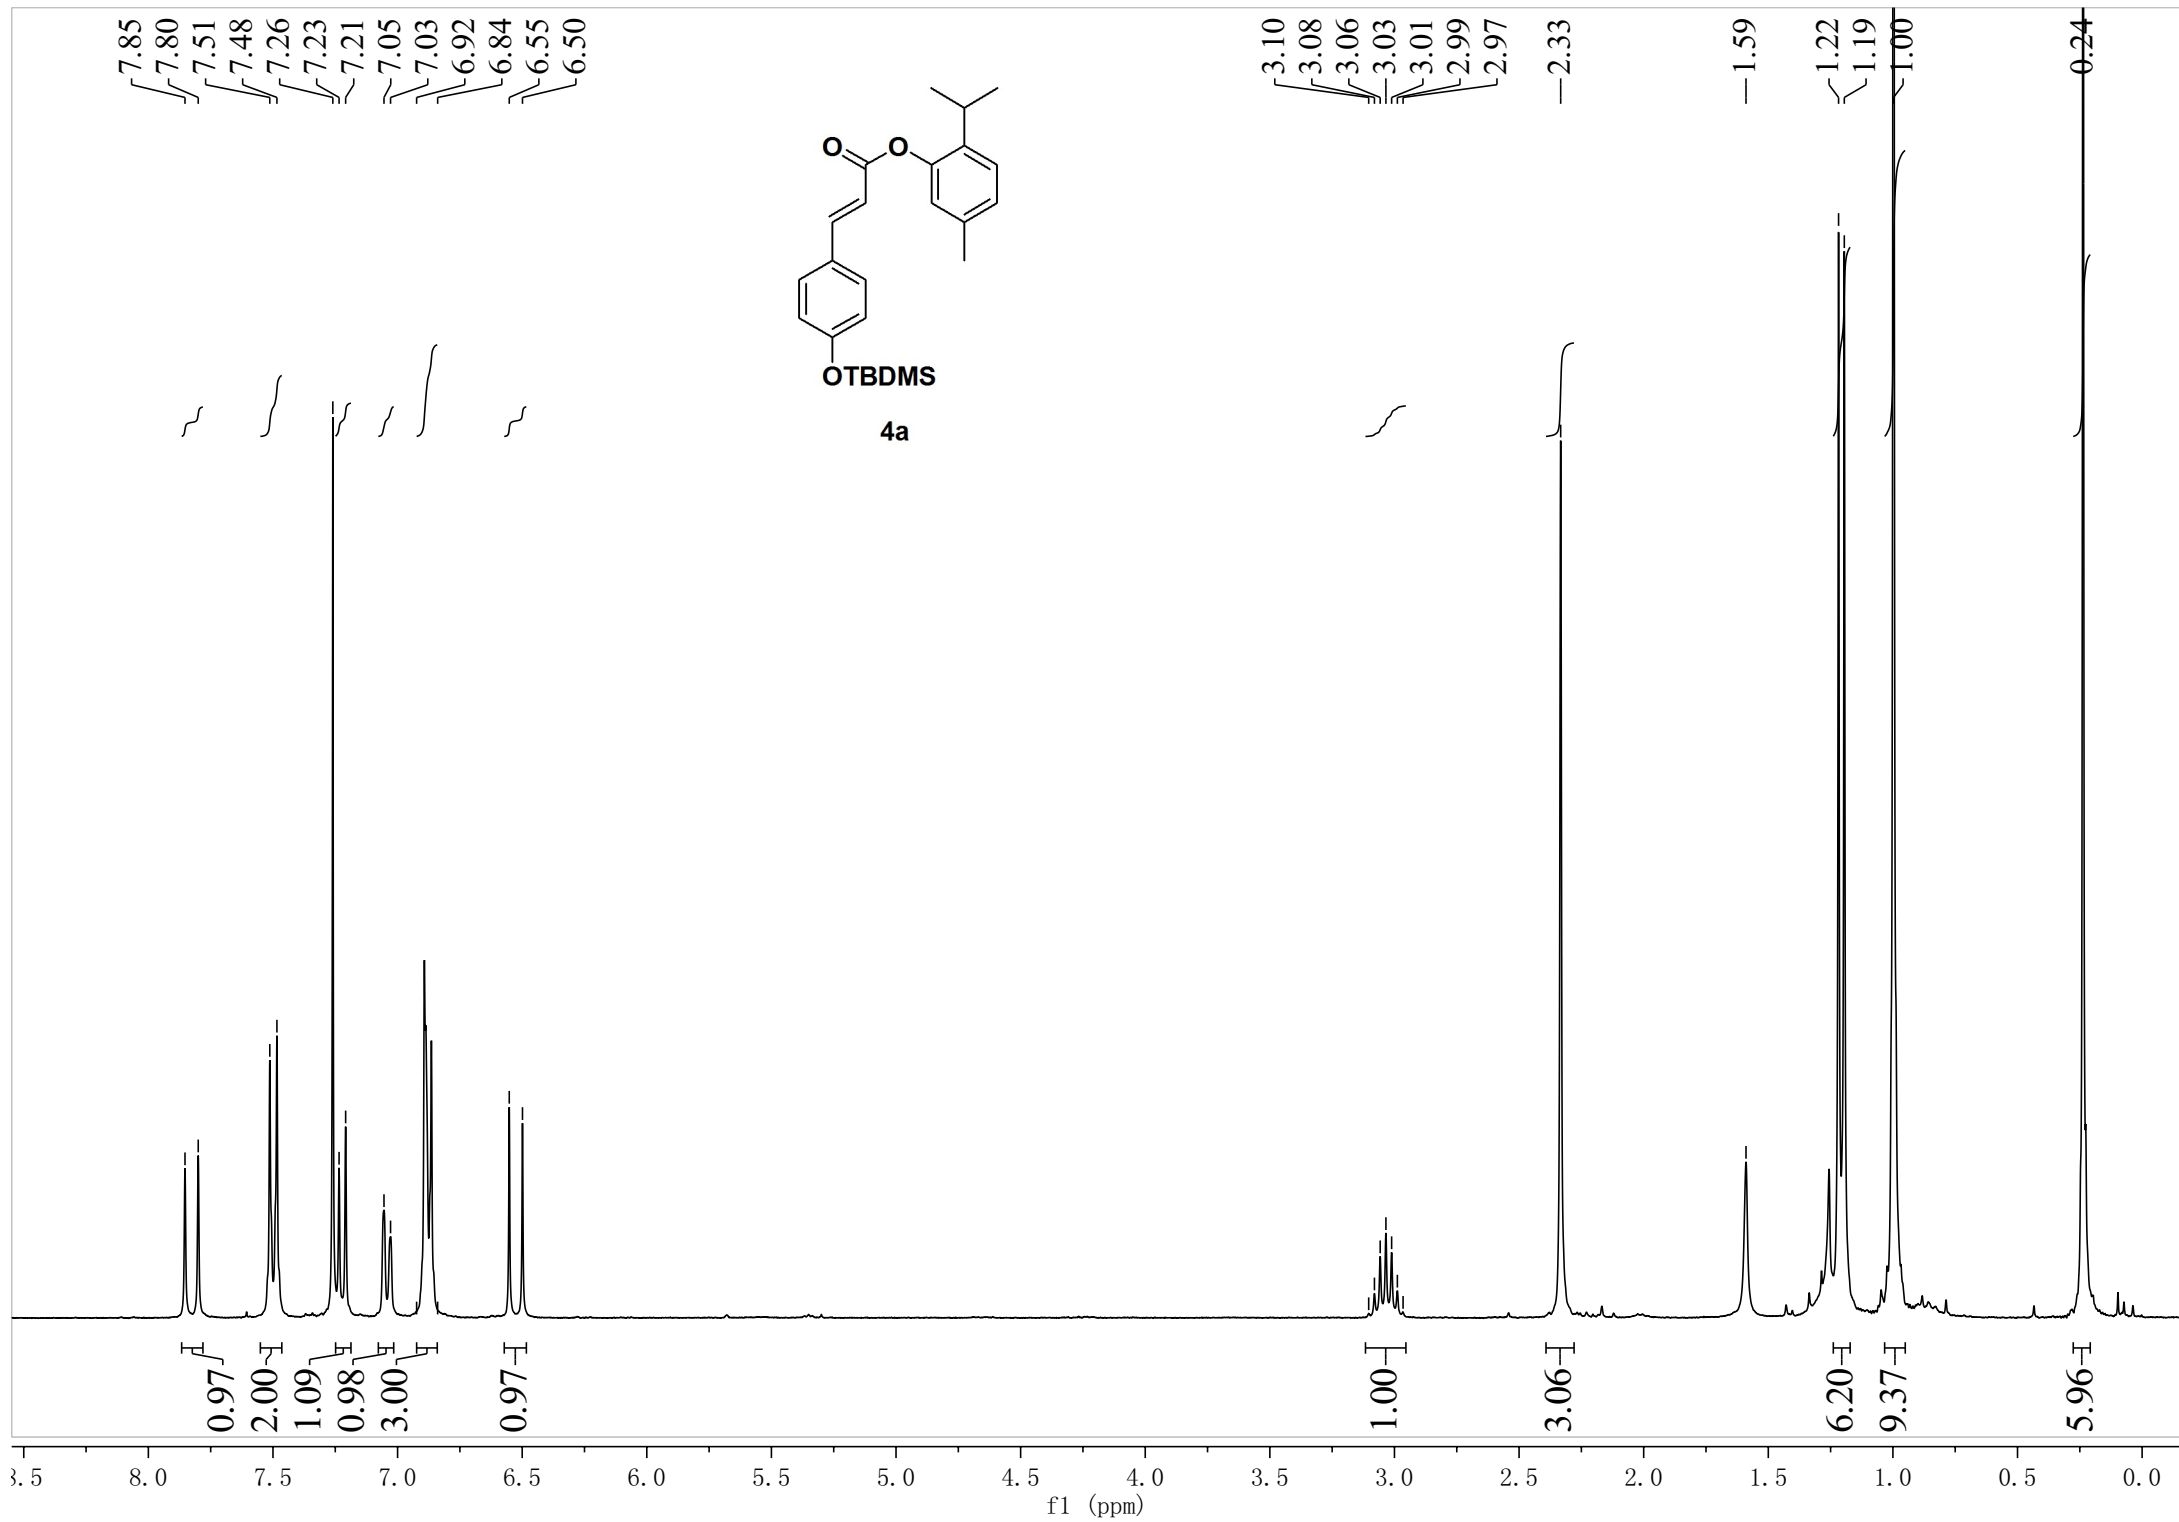

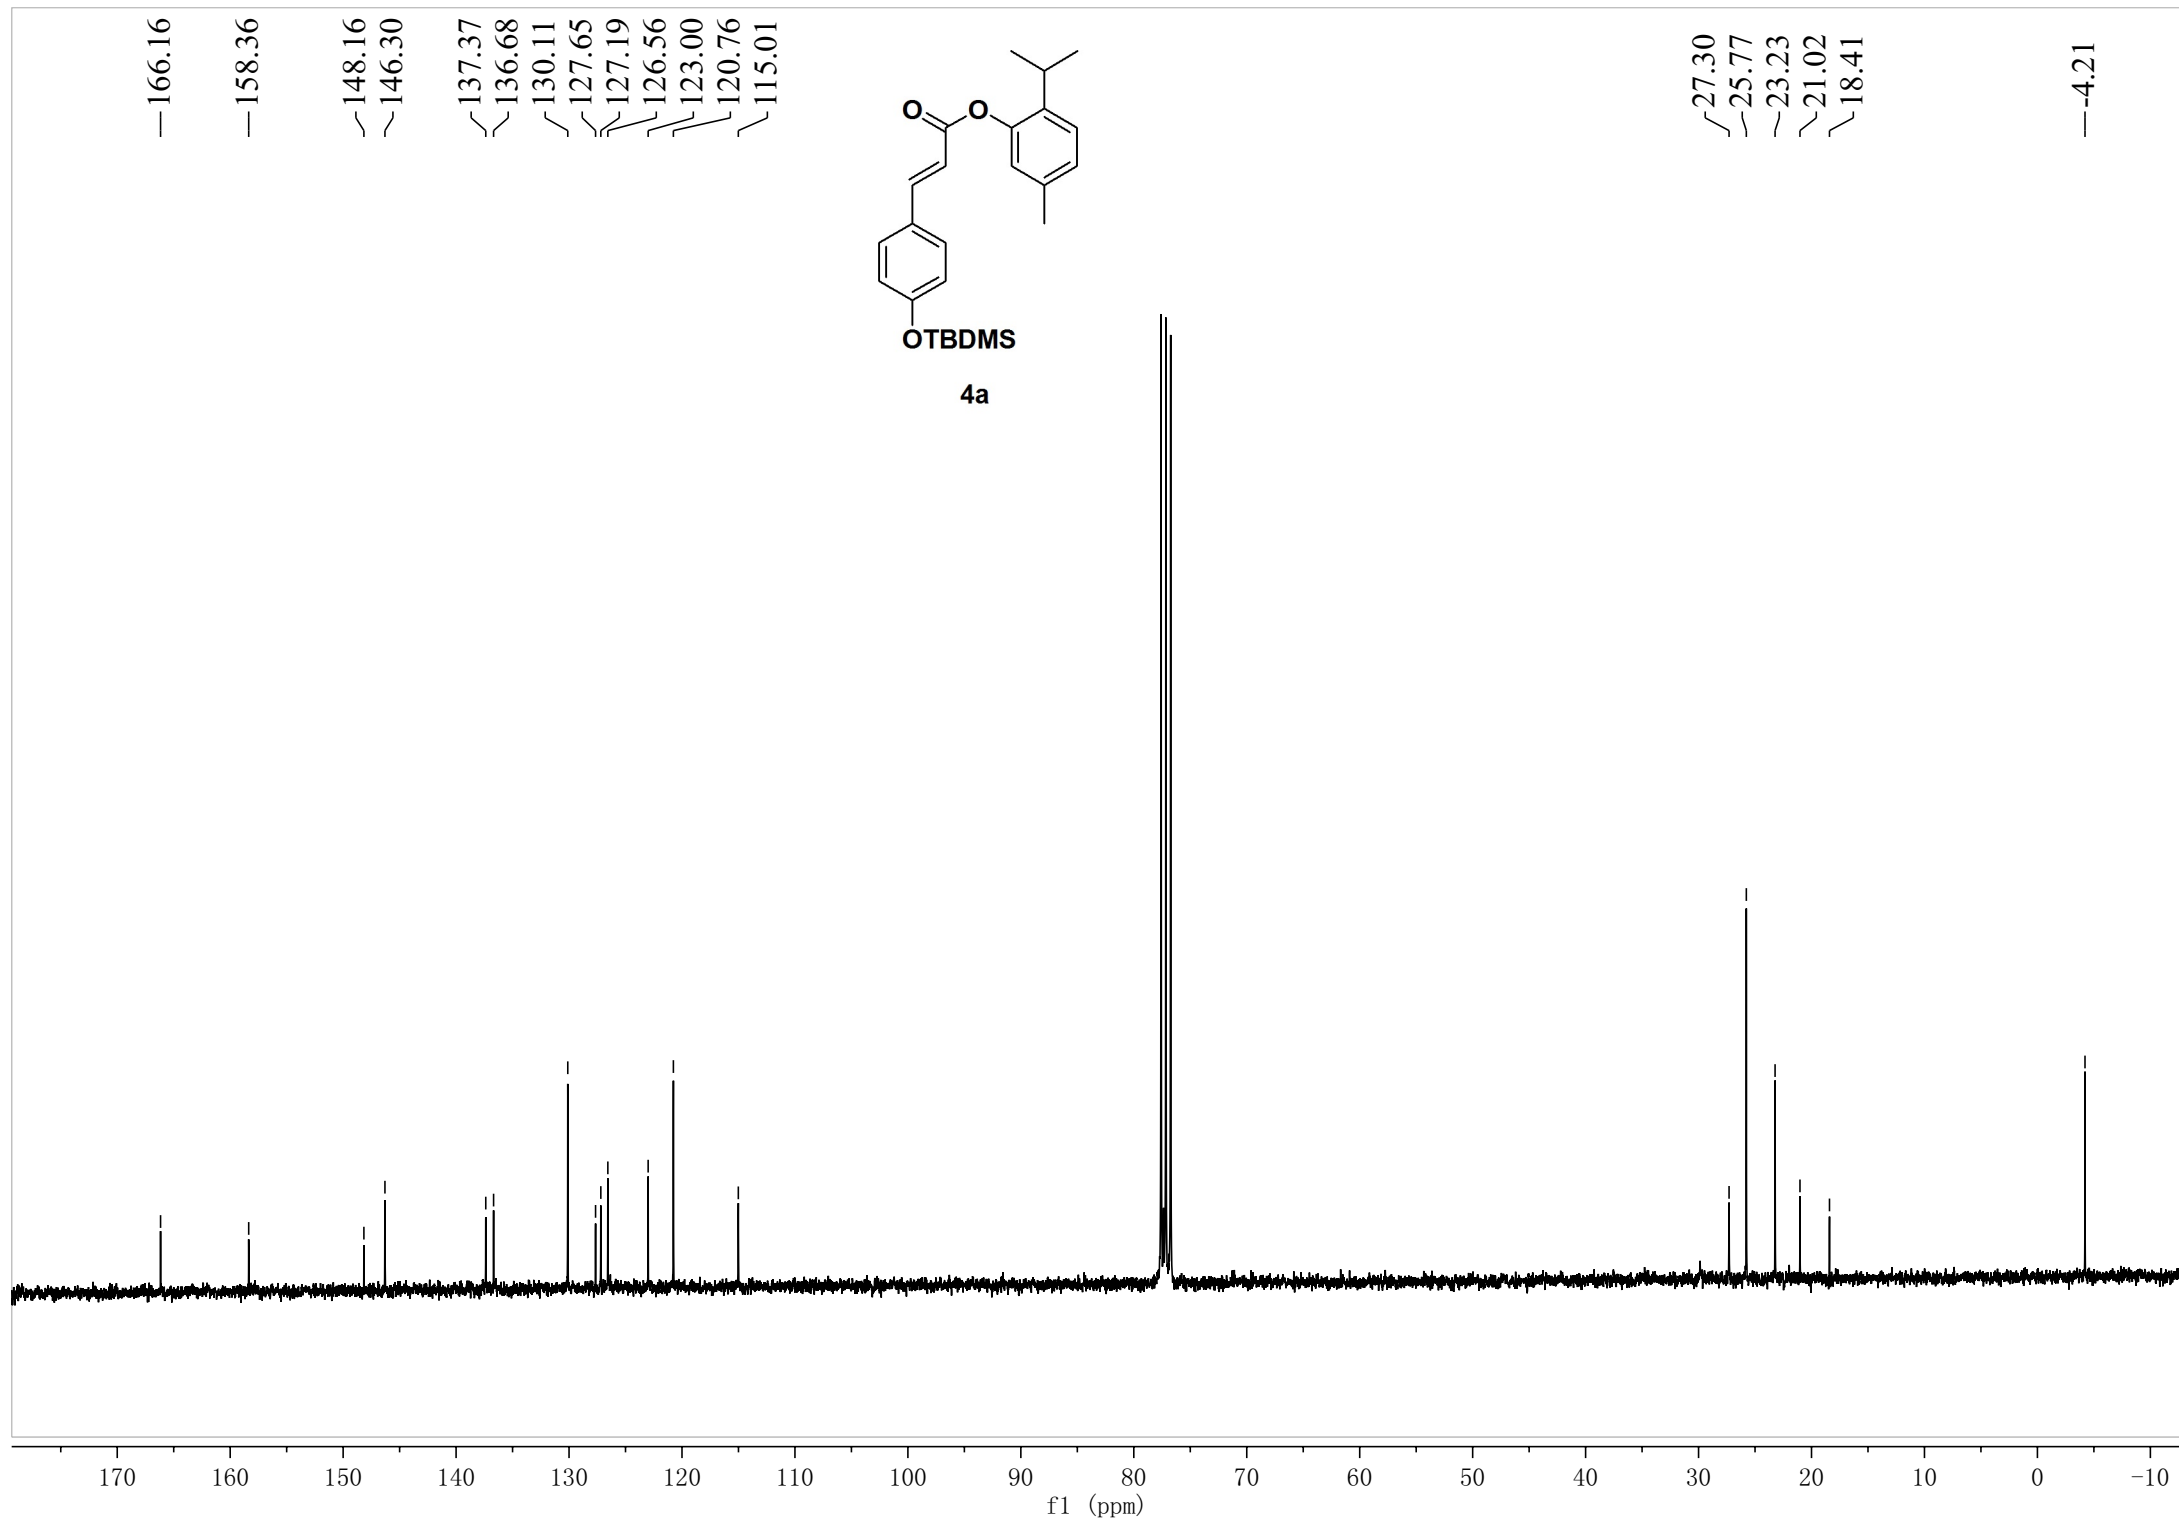

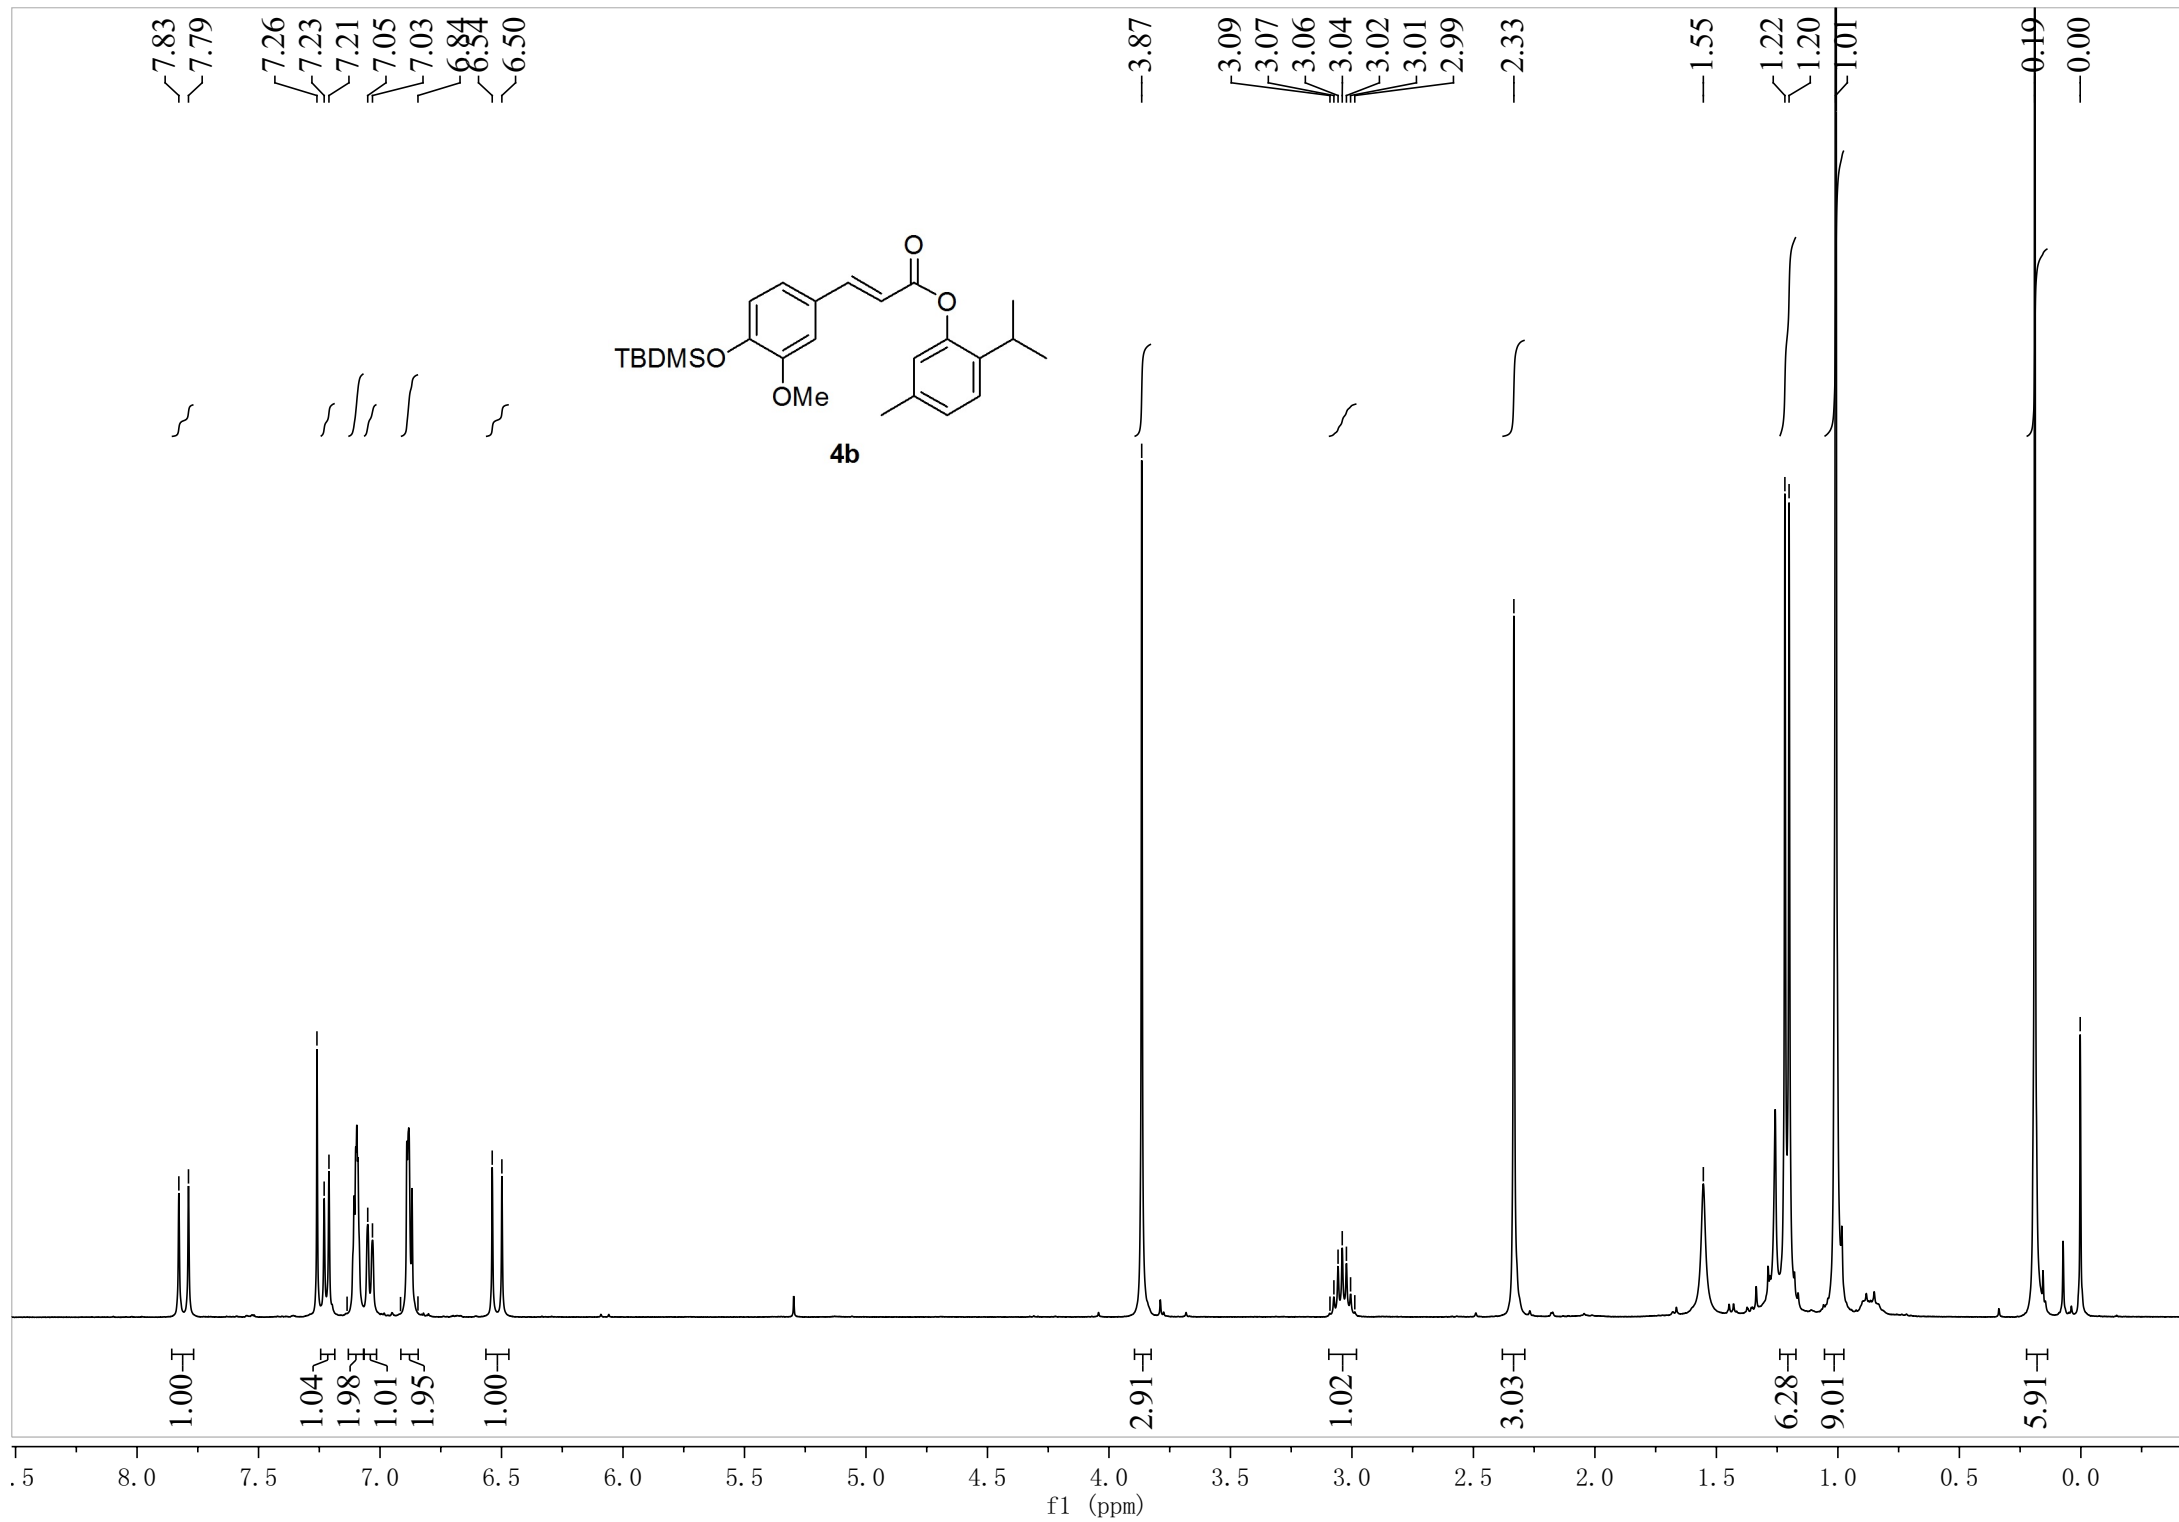

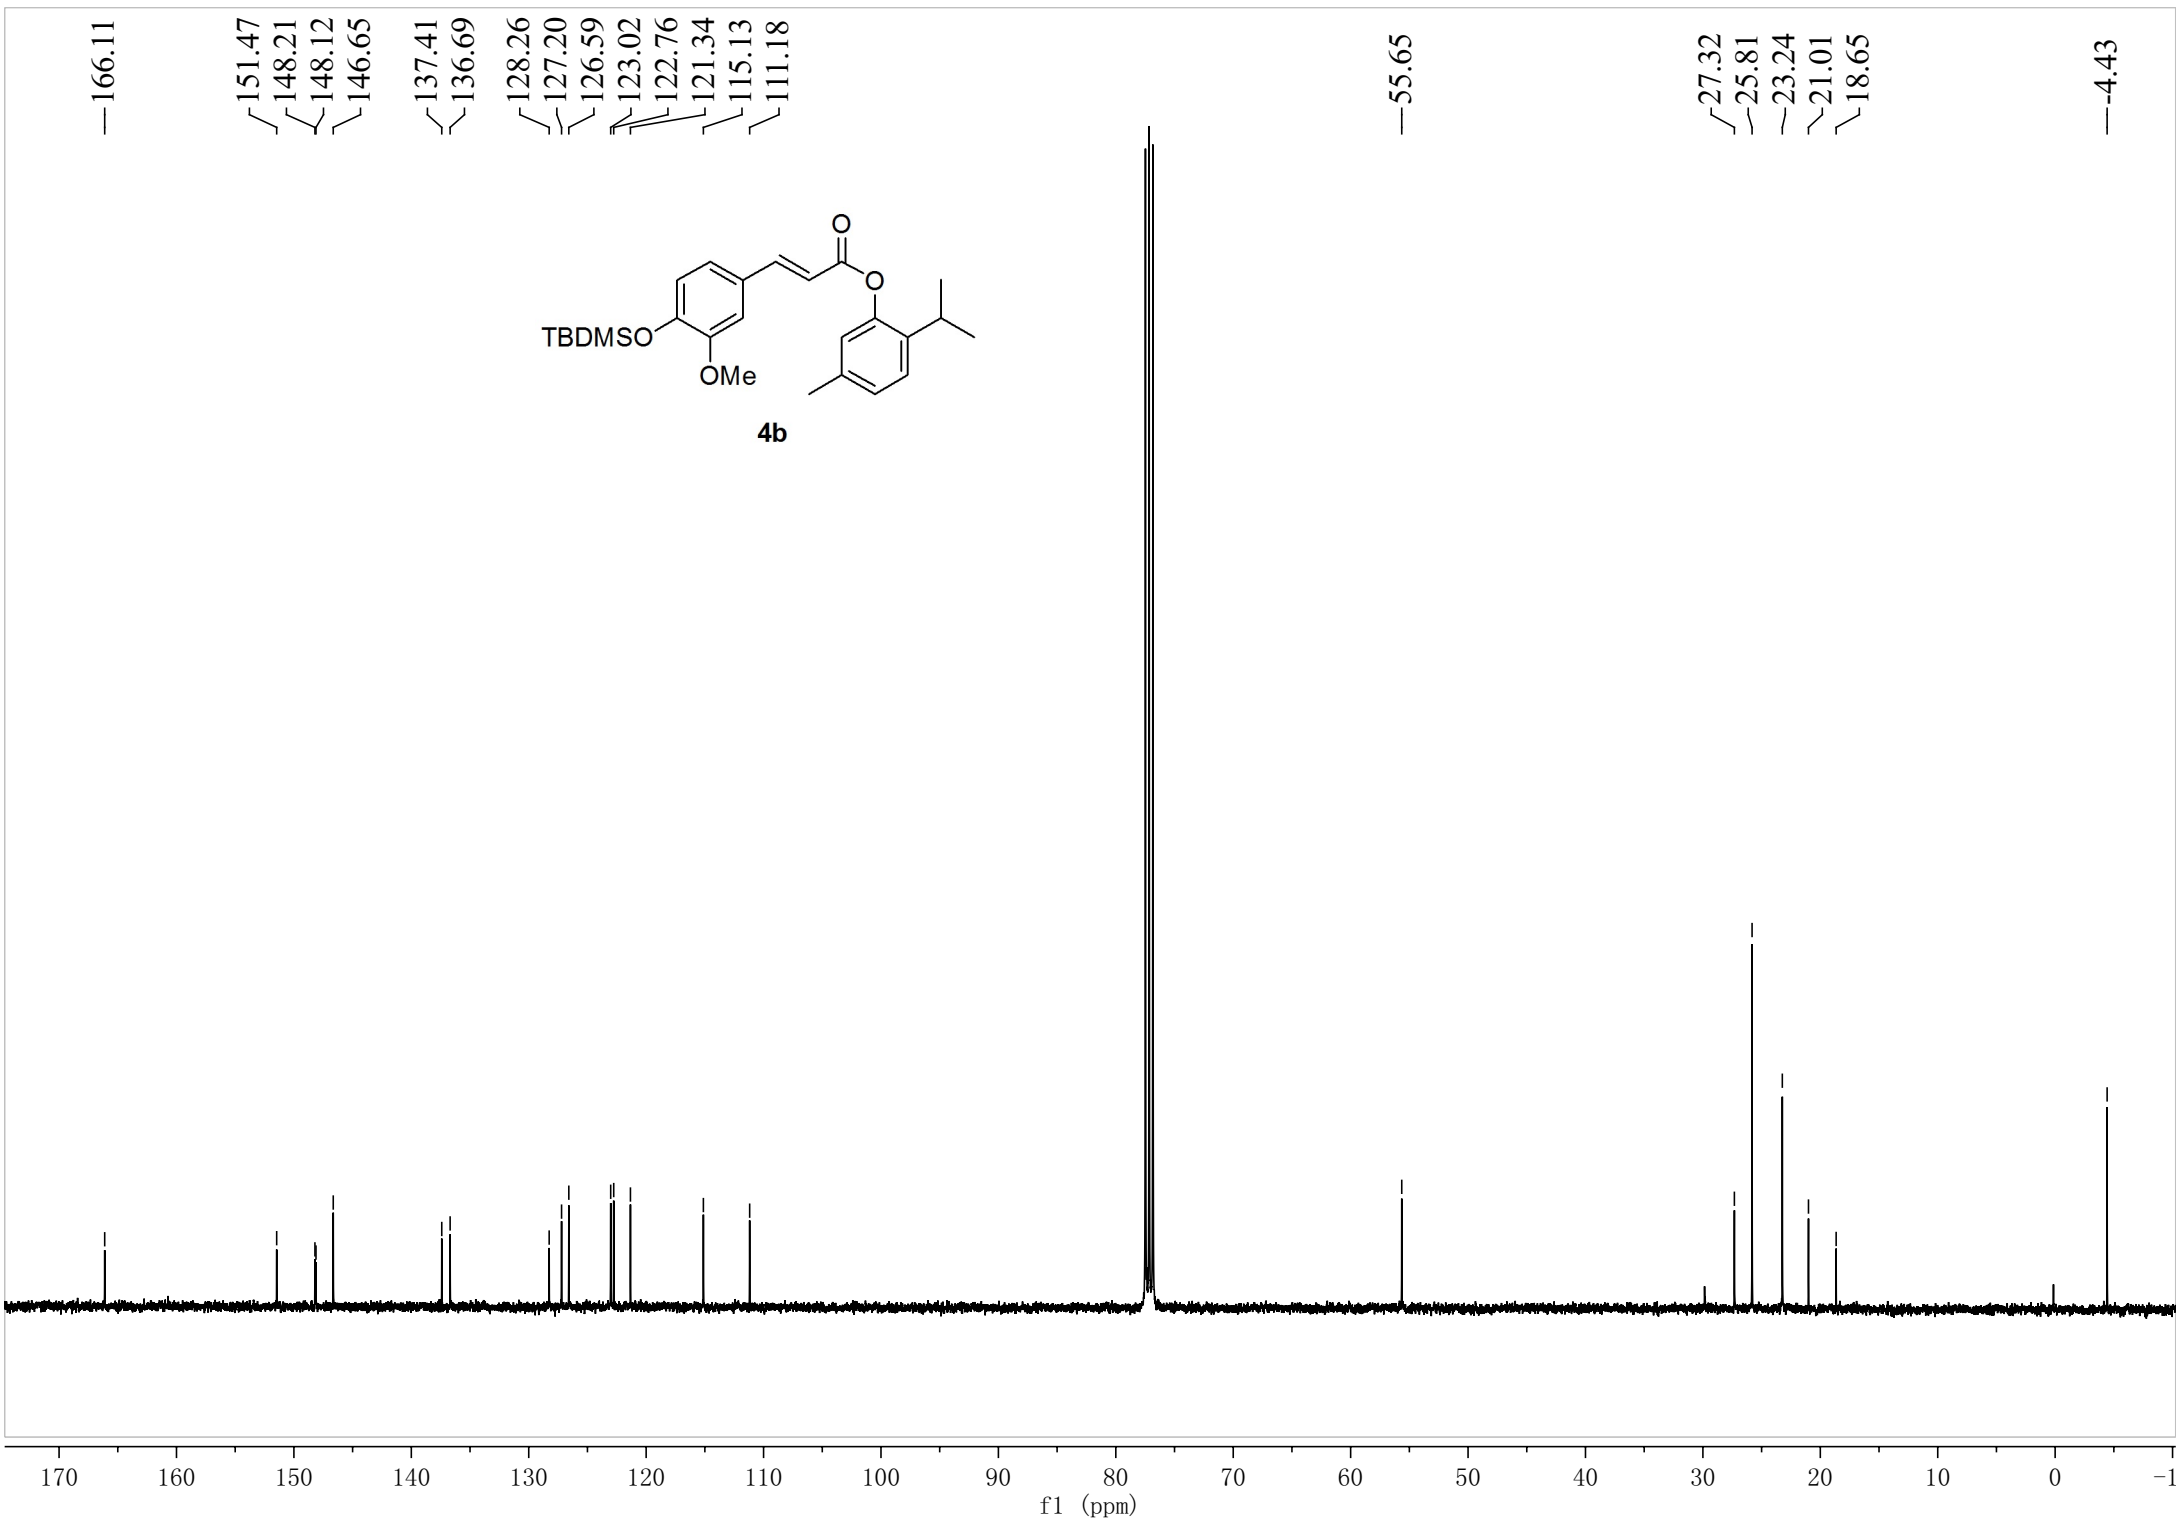

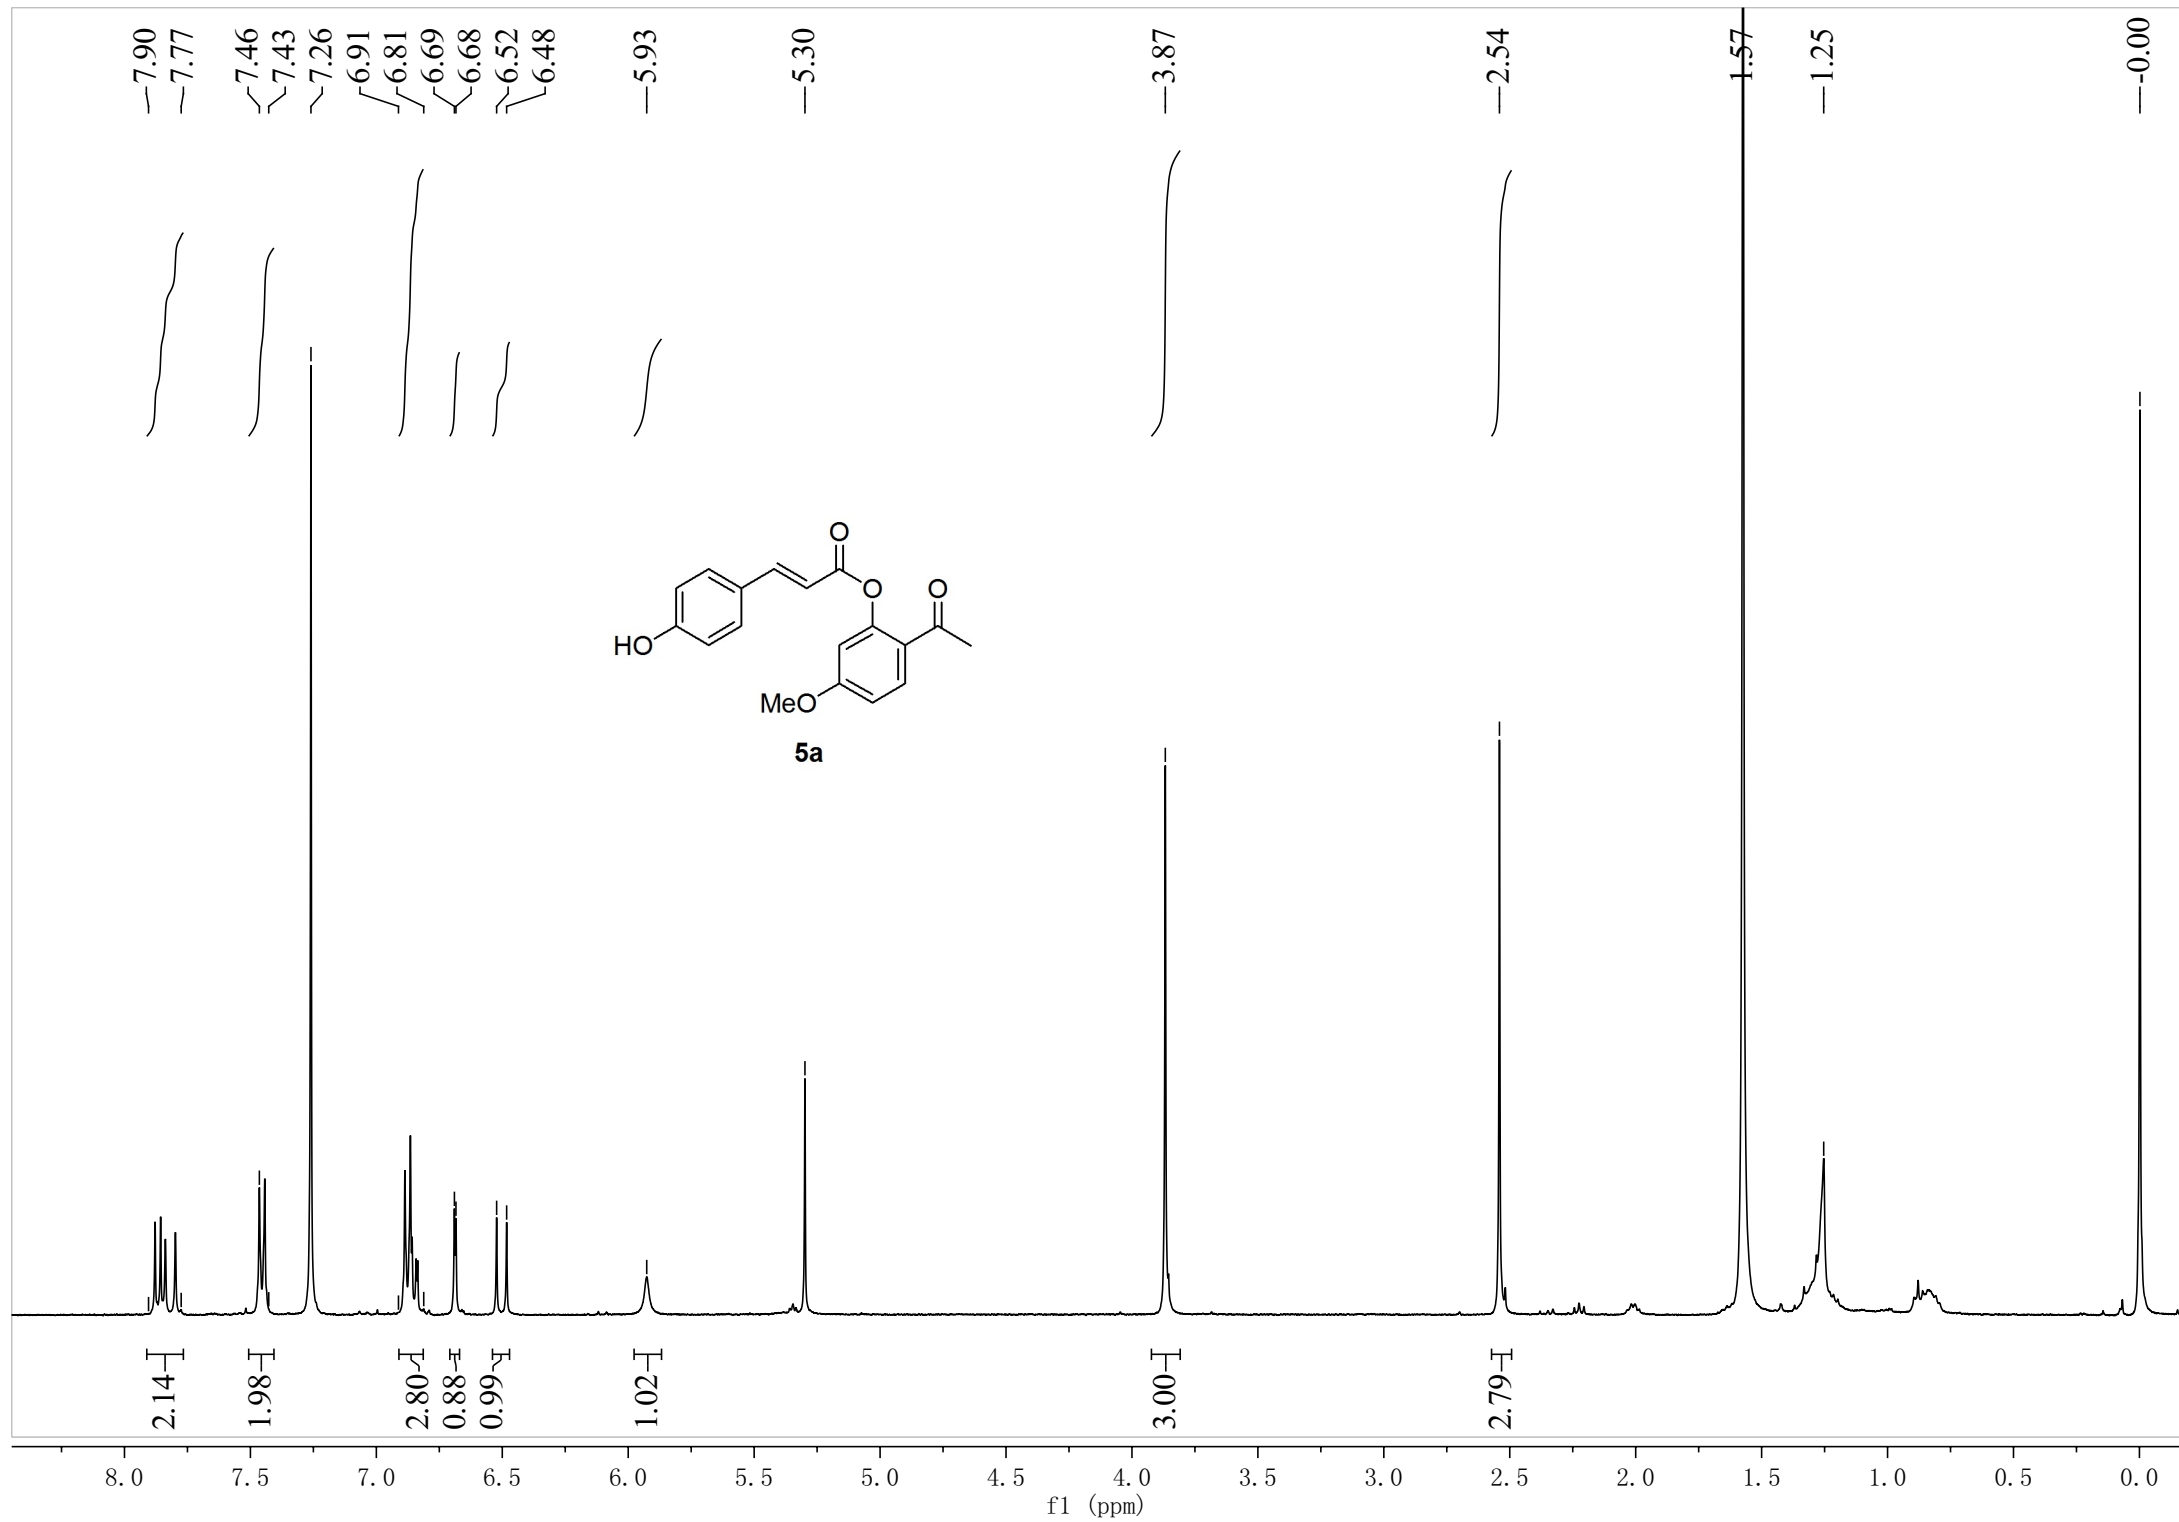

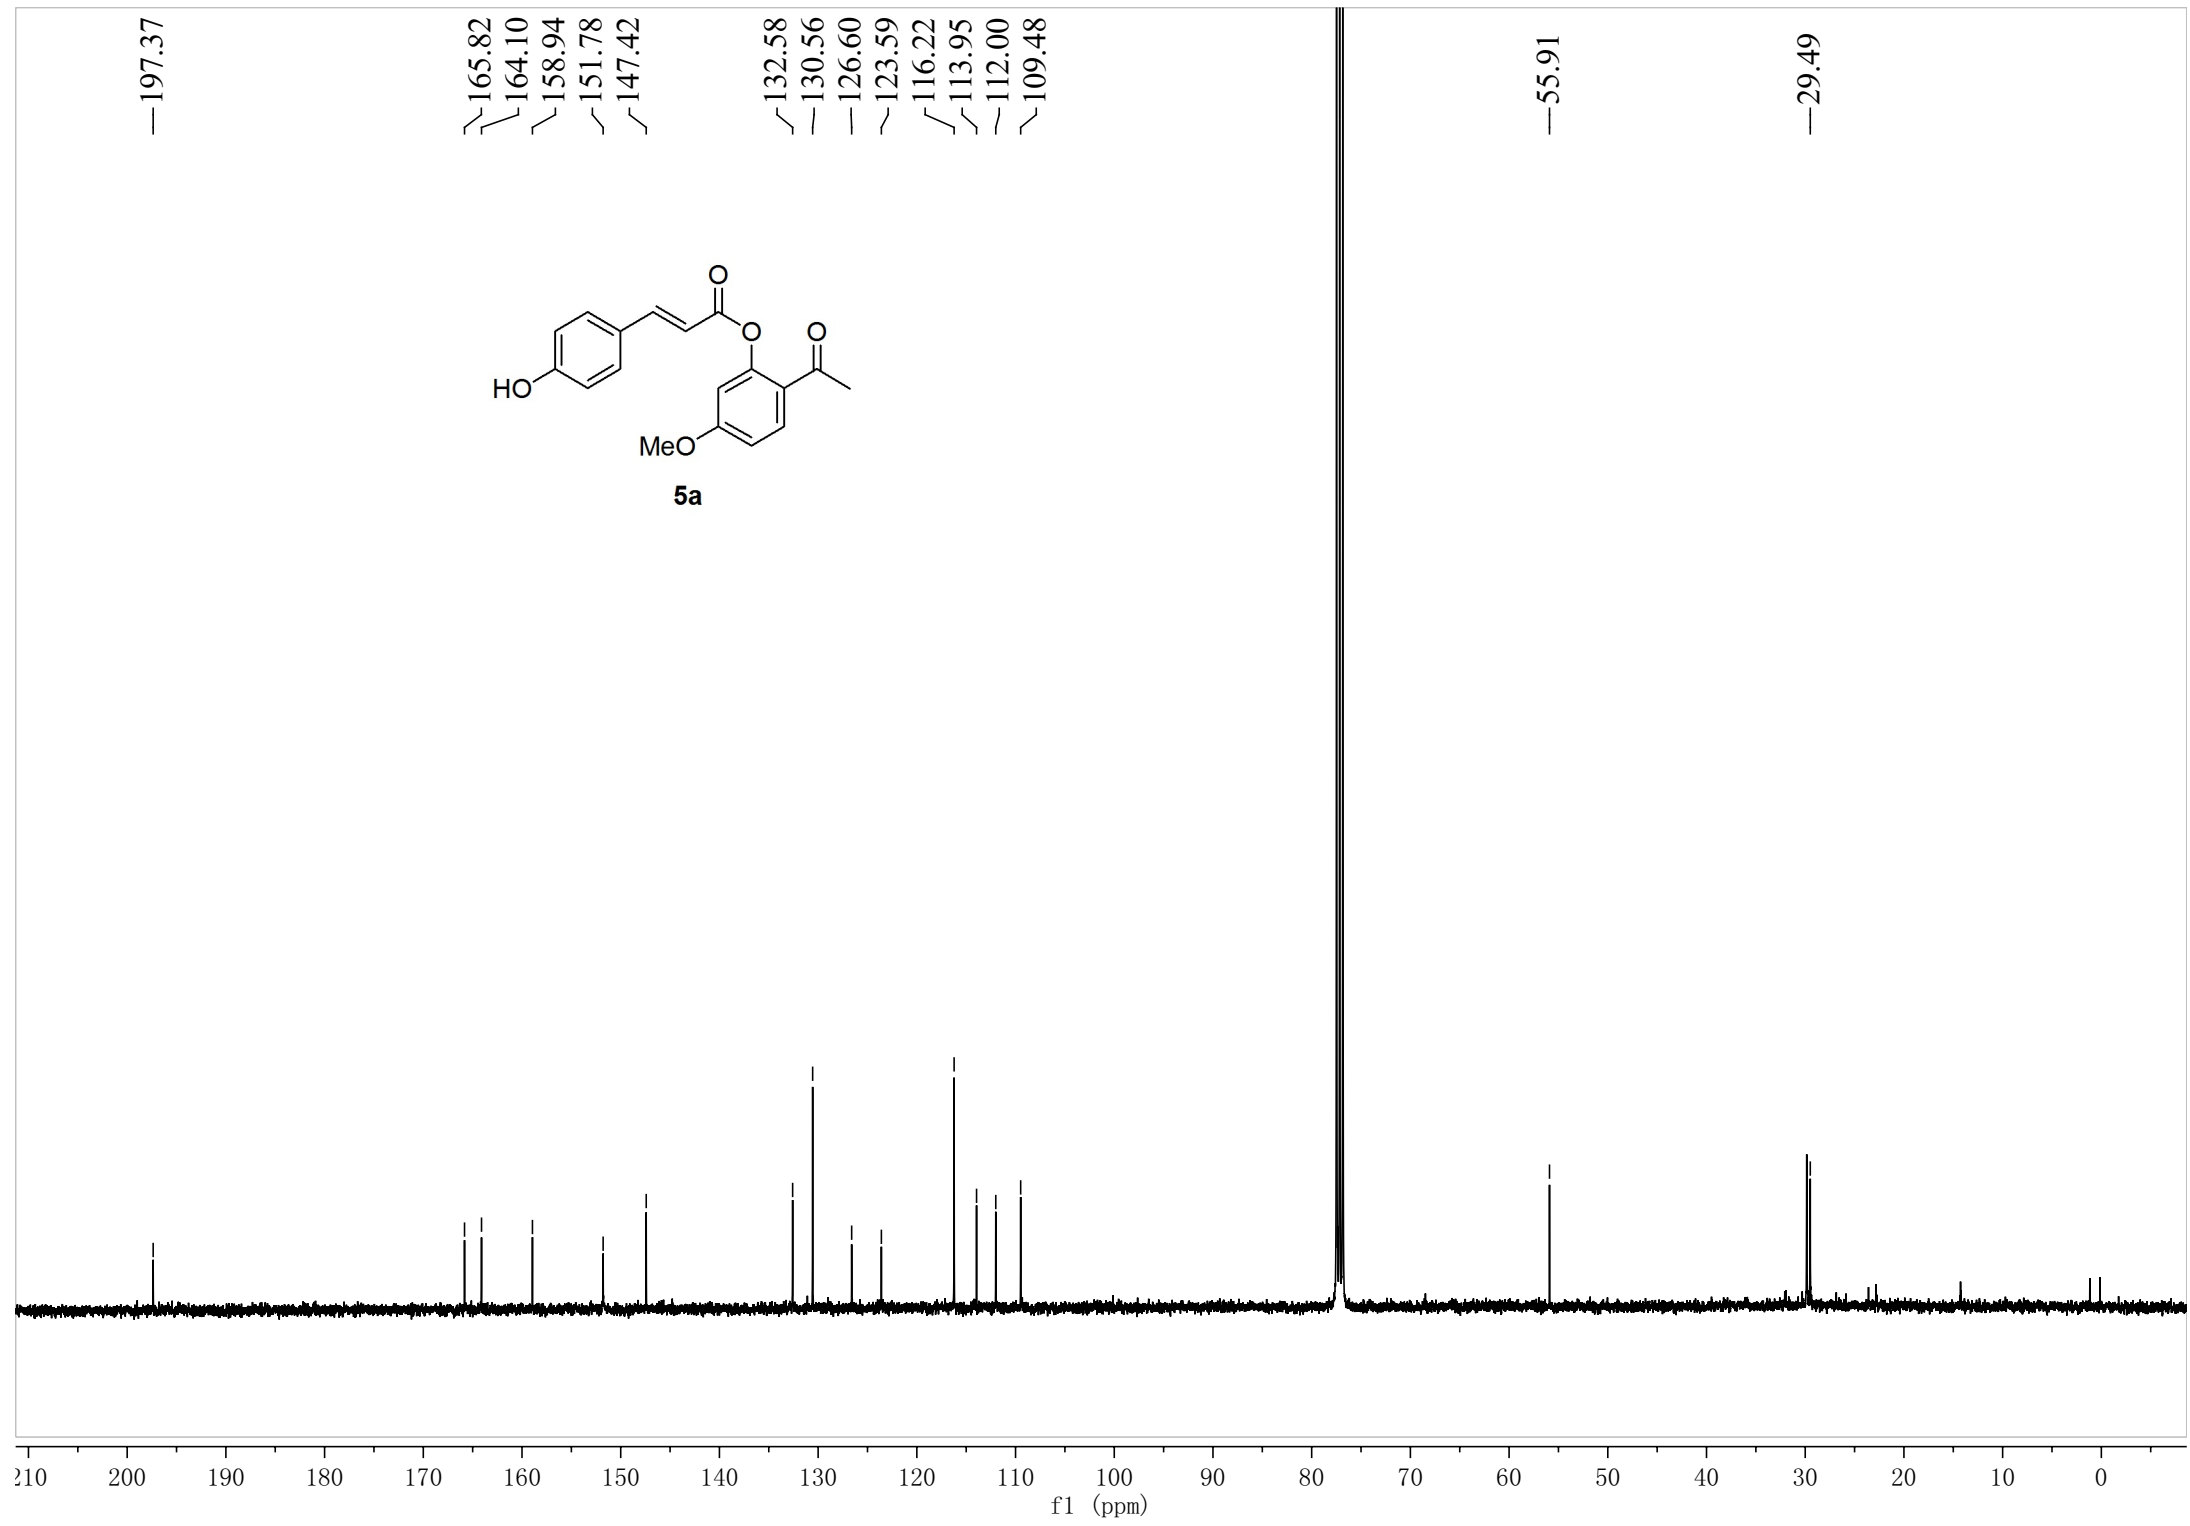

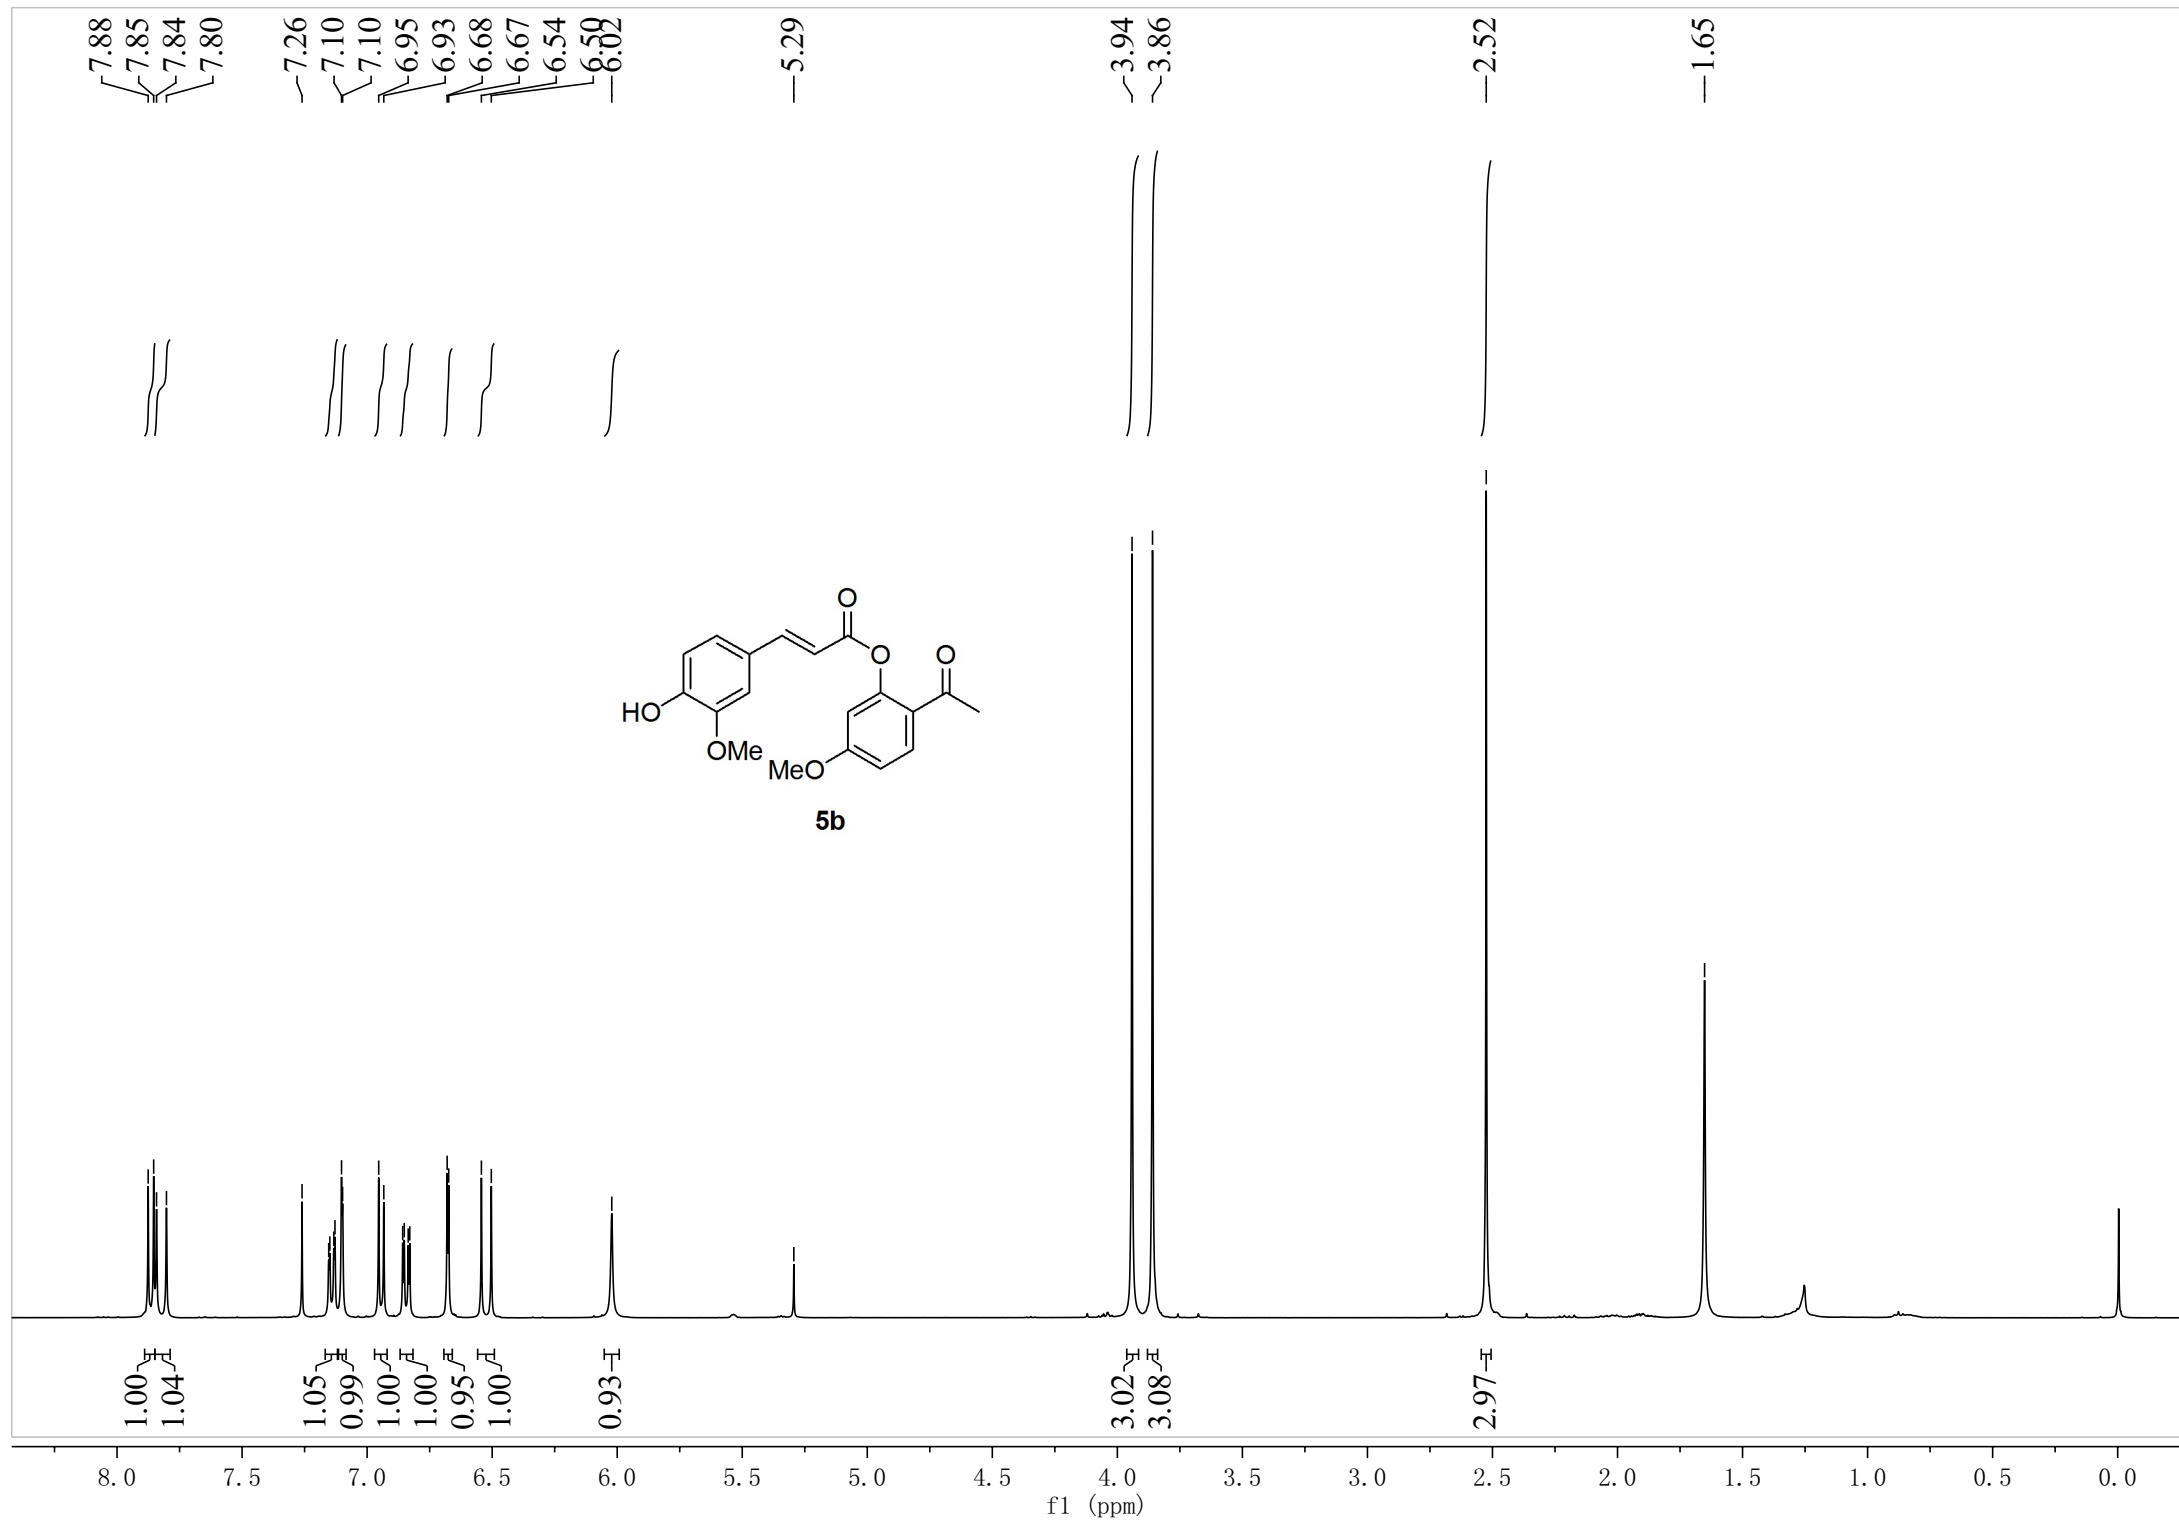

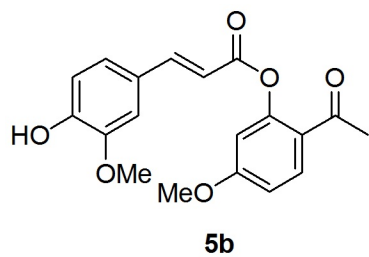

—196.18

~165.60  
~163.84

~151.69  
~148.66  
~147.61  
~146.99

~132.39  
~126.80  
~123.85

~114.96  
~114.24  
~111.97  
~109.75  
~109.31

~56.13  
~55.86

—29.73

200 190 180 170 160 150 140 130 120 110 100 90 80 70 60 50 40 30 20 10 0

f1 (ppm)



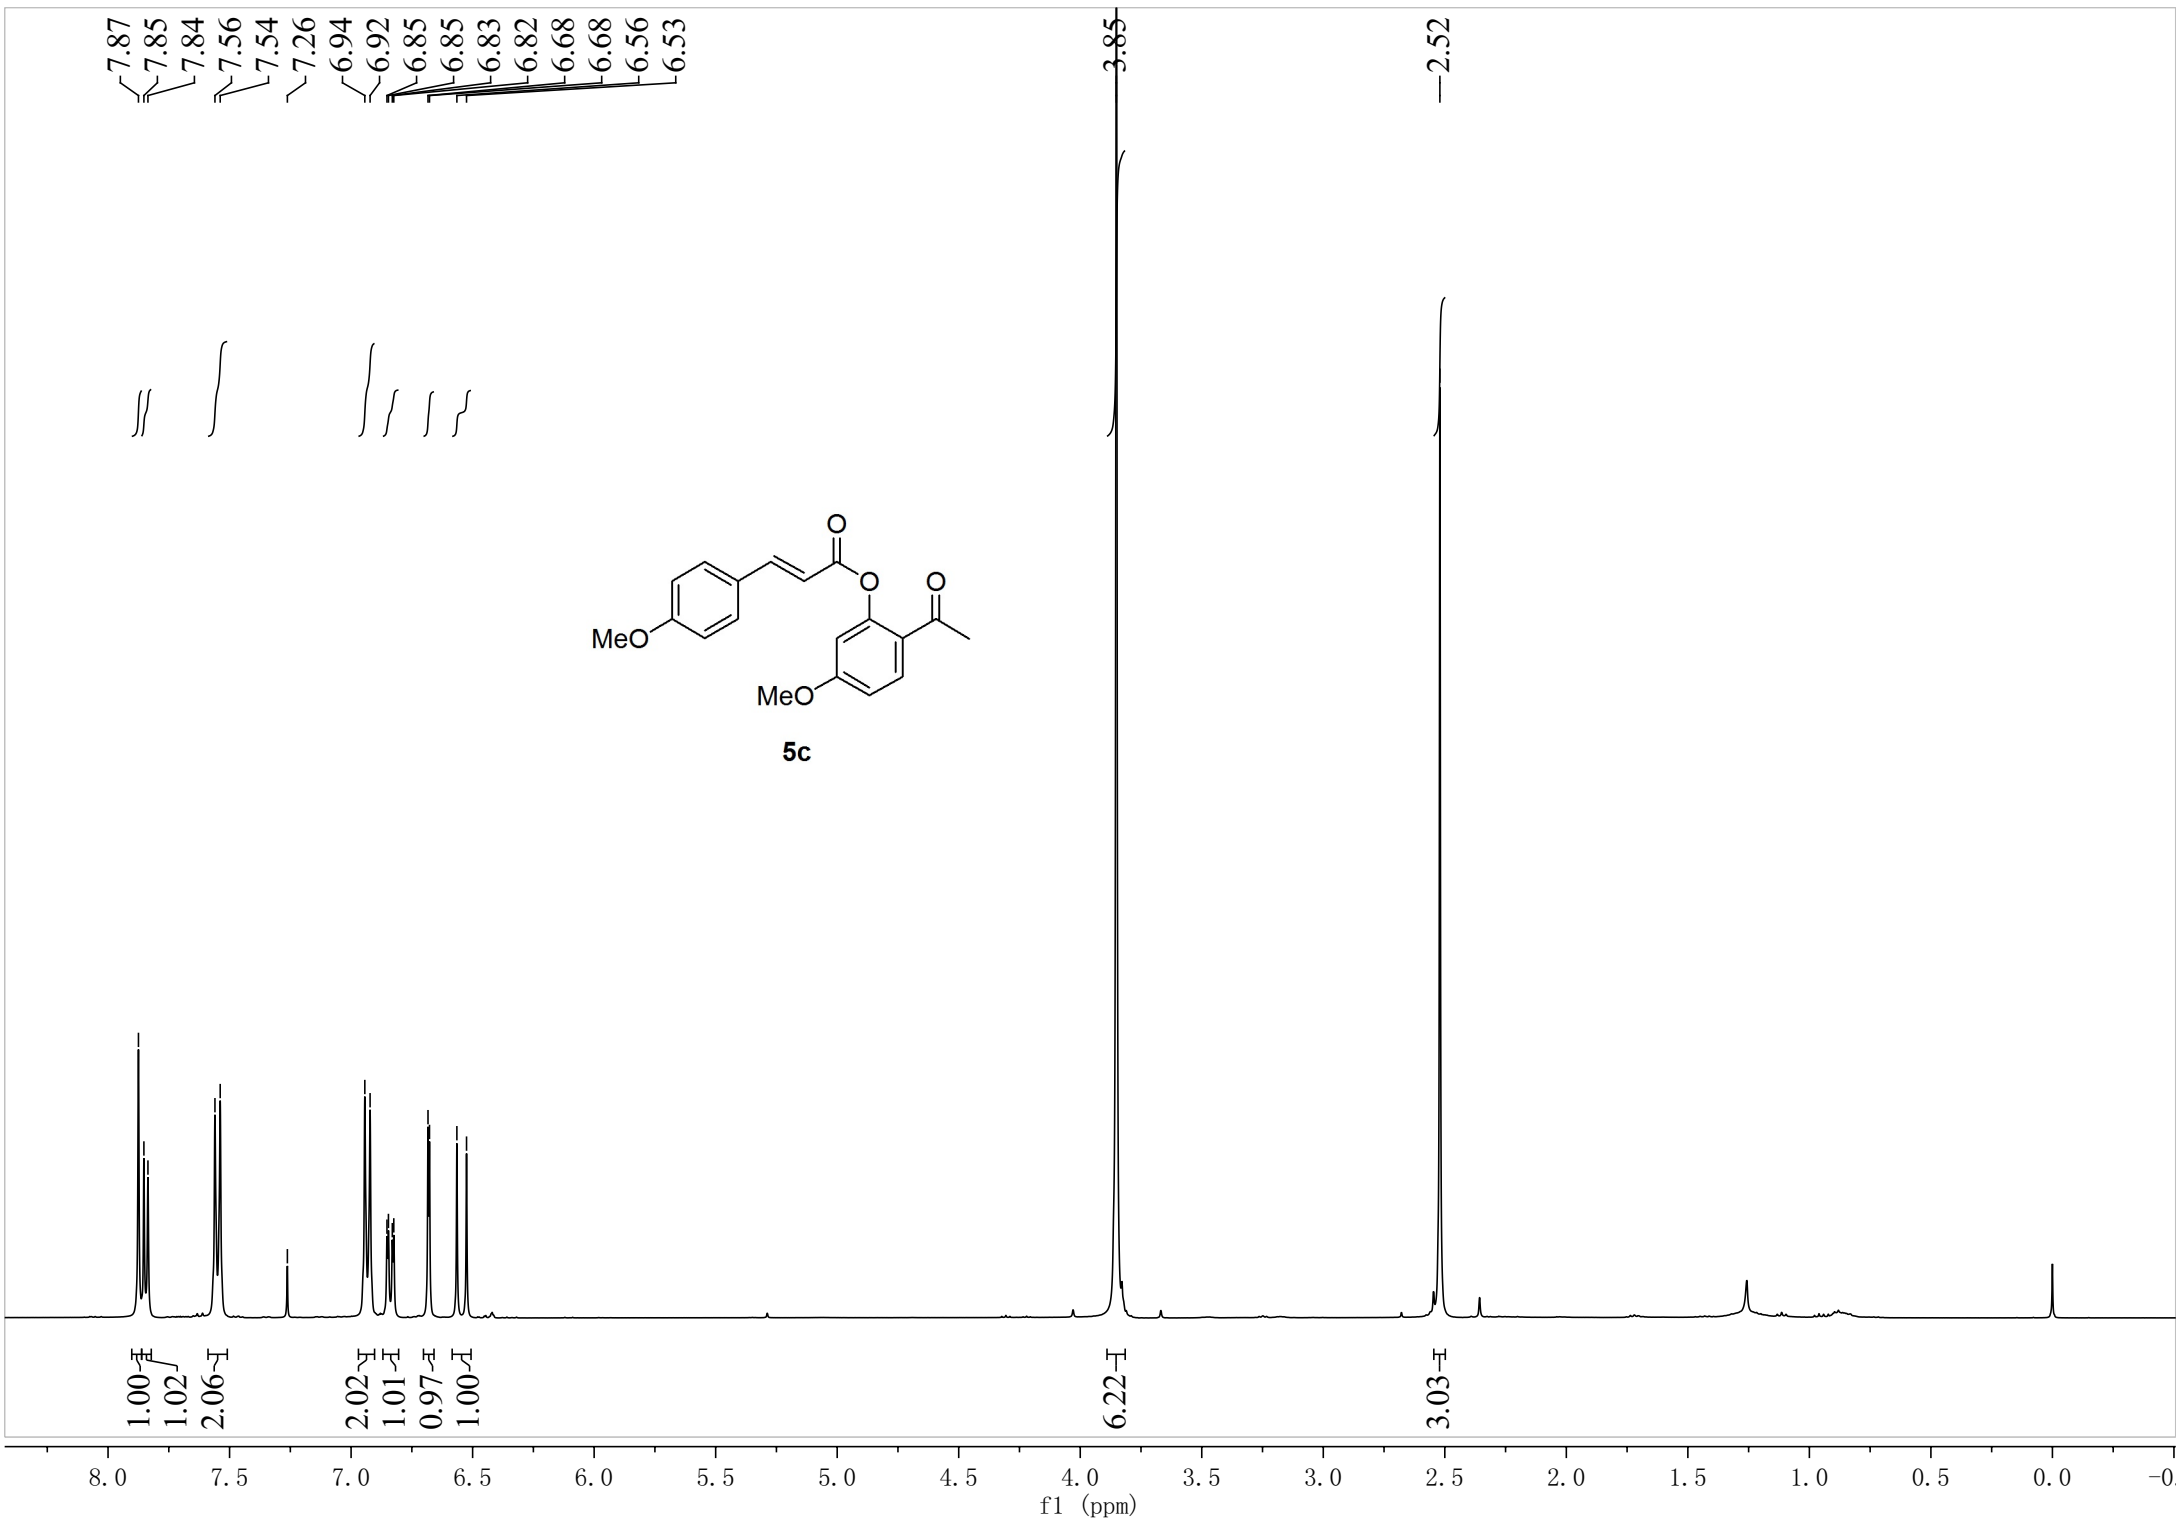

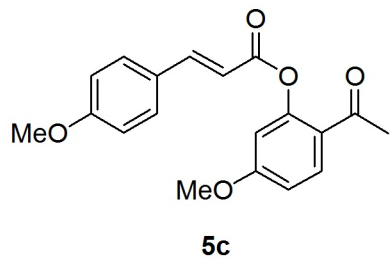

—195.97

—165.53

—163.79

—162.00

—151.70

—147.16

—132.29

—130.31

—126.94

—123.94

—114.56

—114.34

—111.96

—109.24

—55.81

—55.52

—29.76

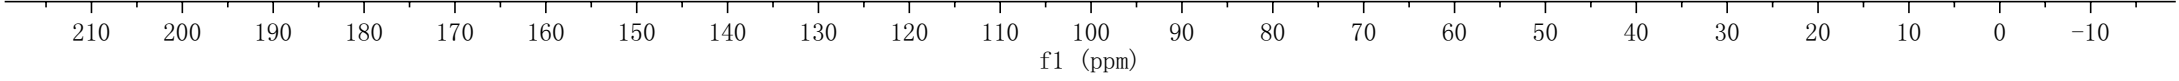

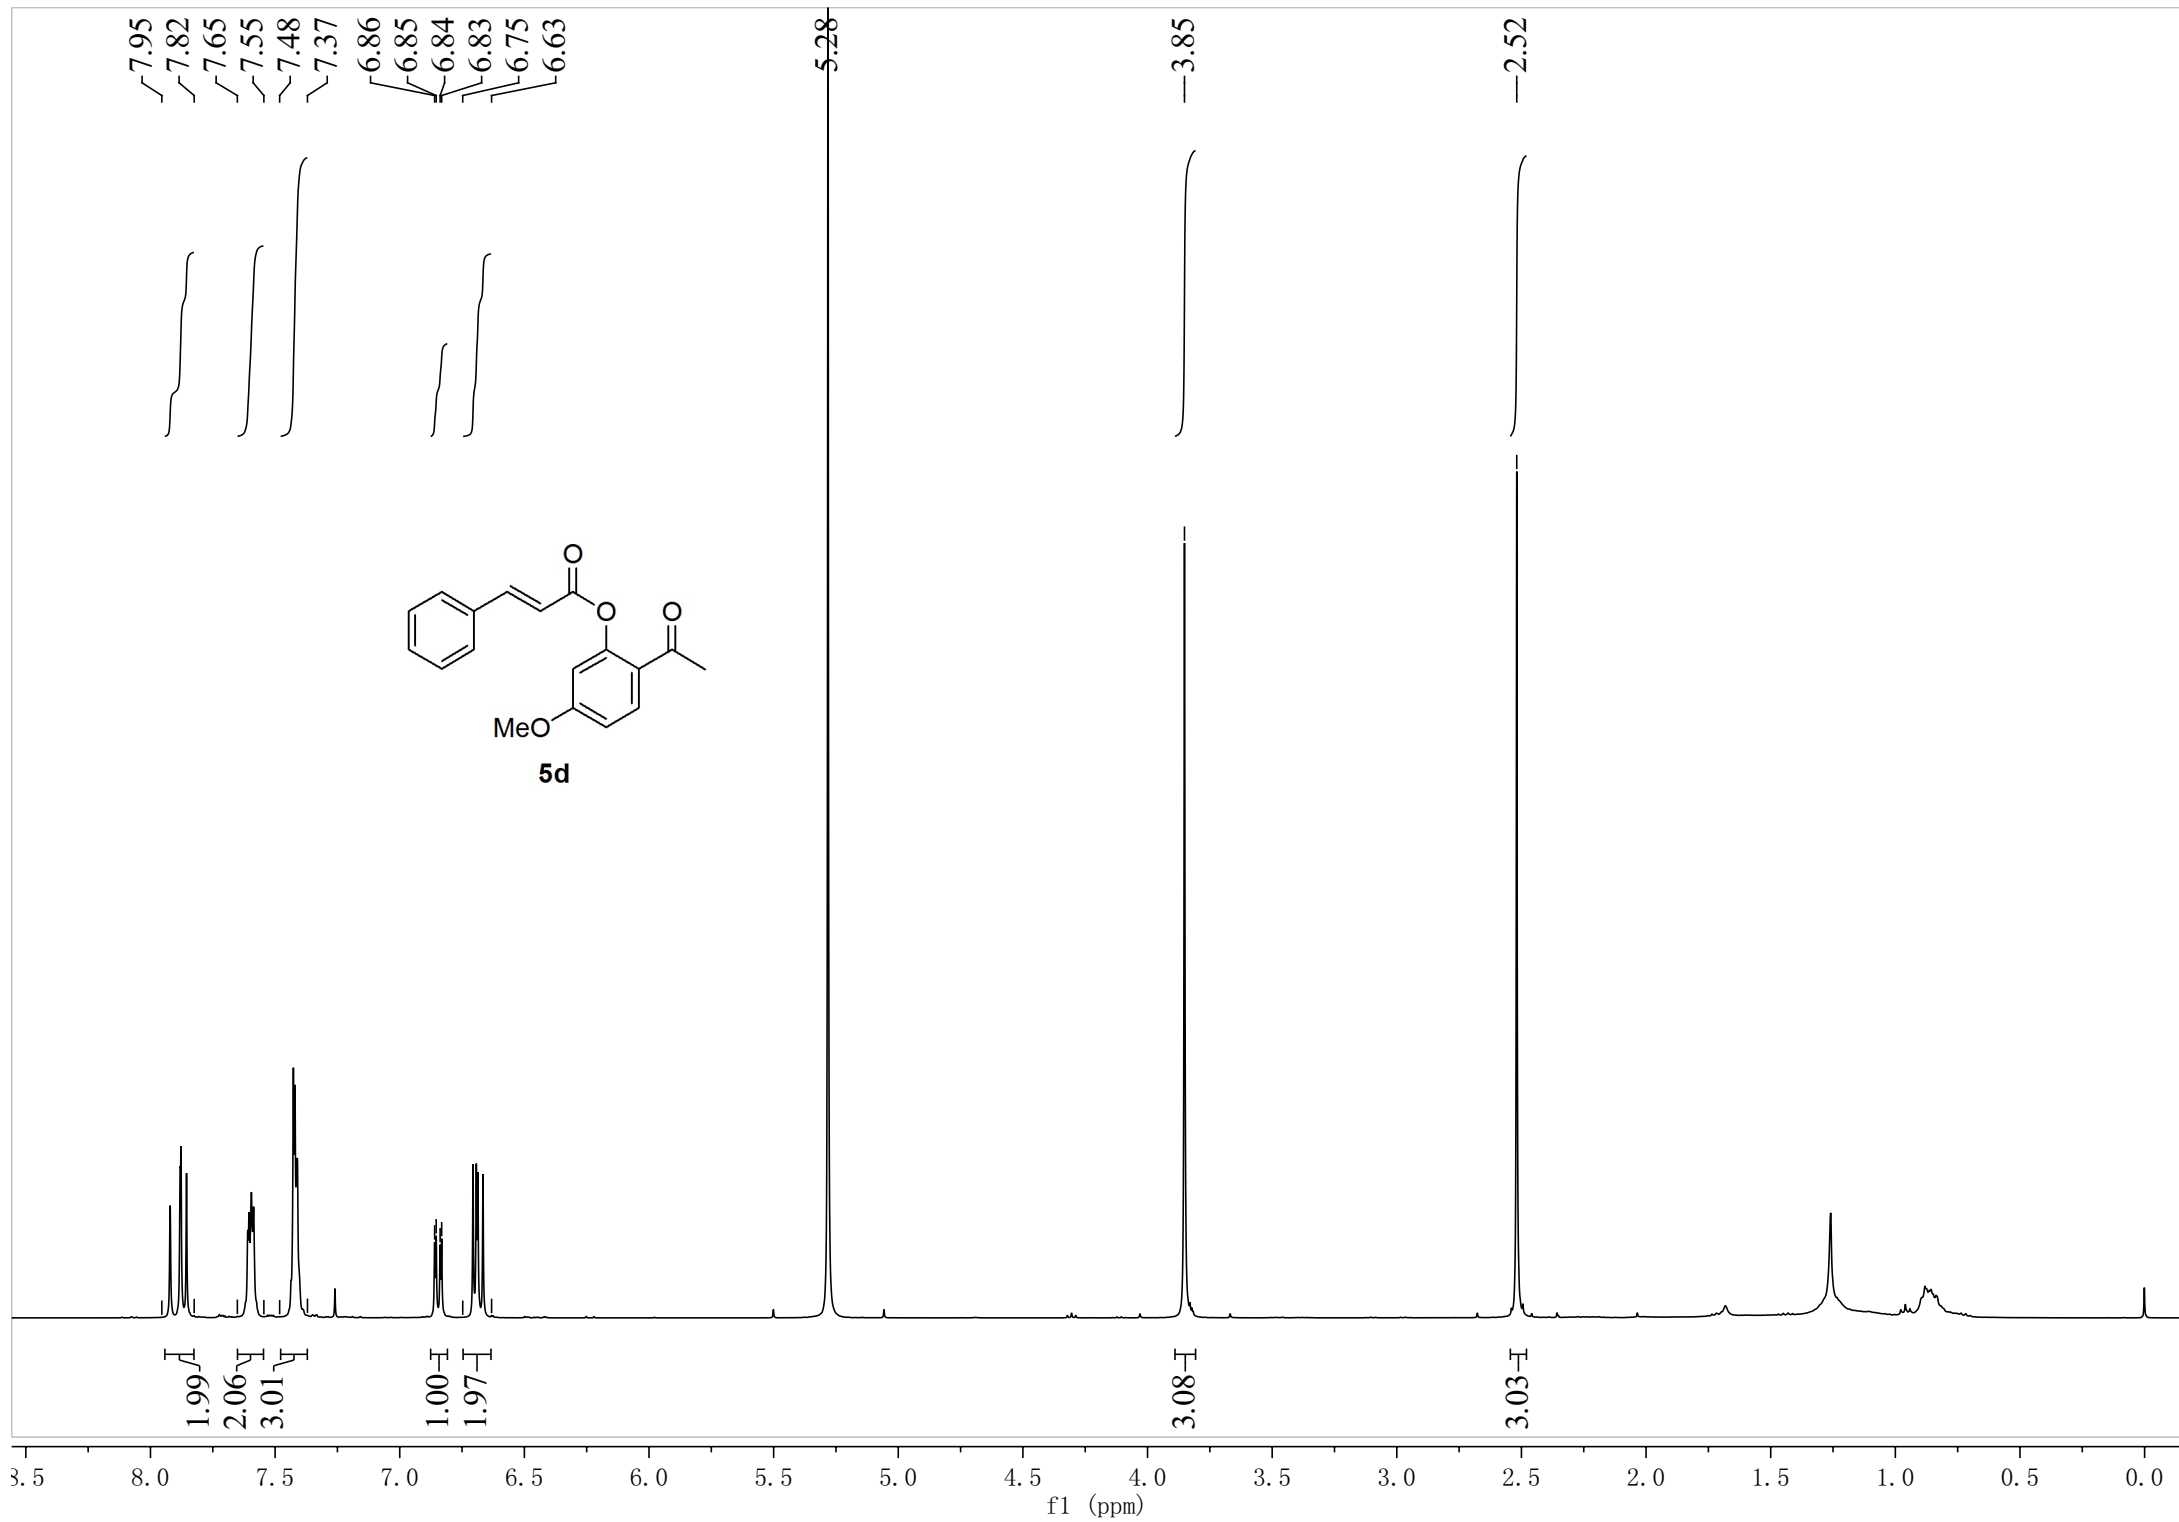

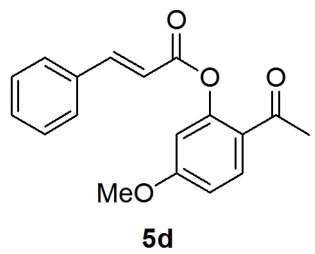

- 195.84
- ~165.20
- ~163.78
- 151.51
- 147.35
- ~134.15
- ~132.35
- ~130.91
- ~129.05
- ~128.50
- ~123.71
- ~117.01
- ~111.93
- ~109.25

—55.79

—29.58

200 190 180 170 160 150 140 130 120 110 100 90 80 70 60 50 40 30 20 10 0

f1 (ppm)

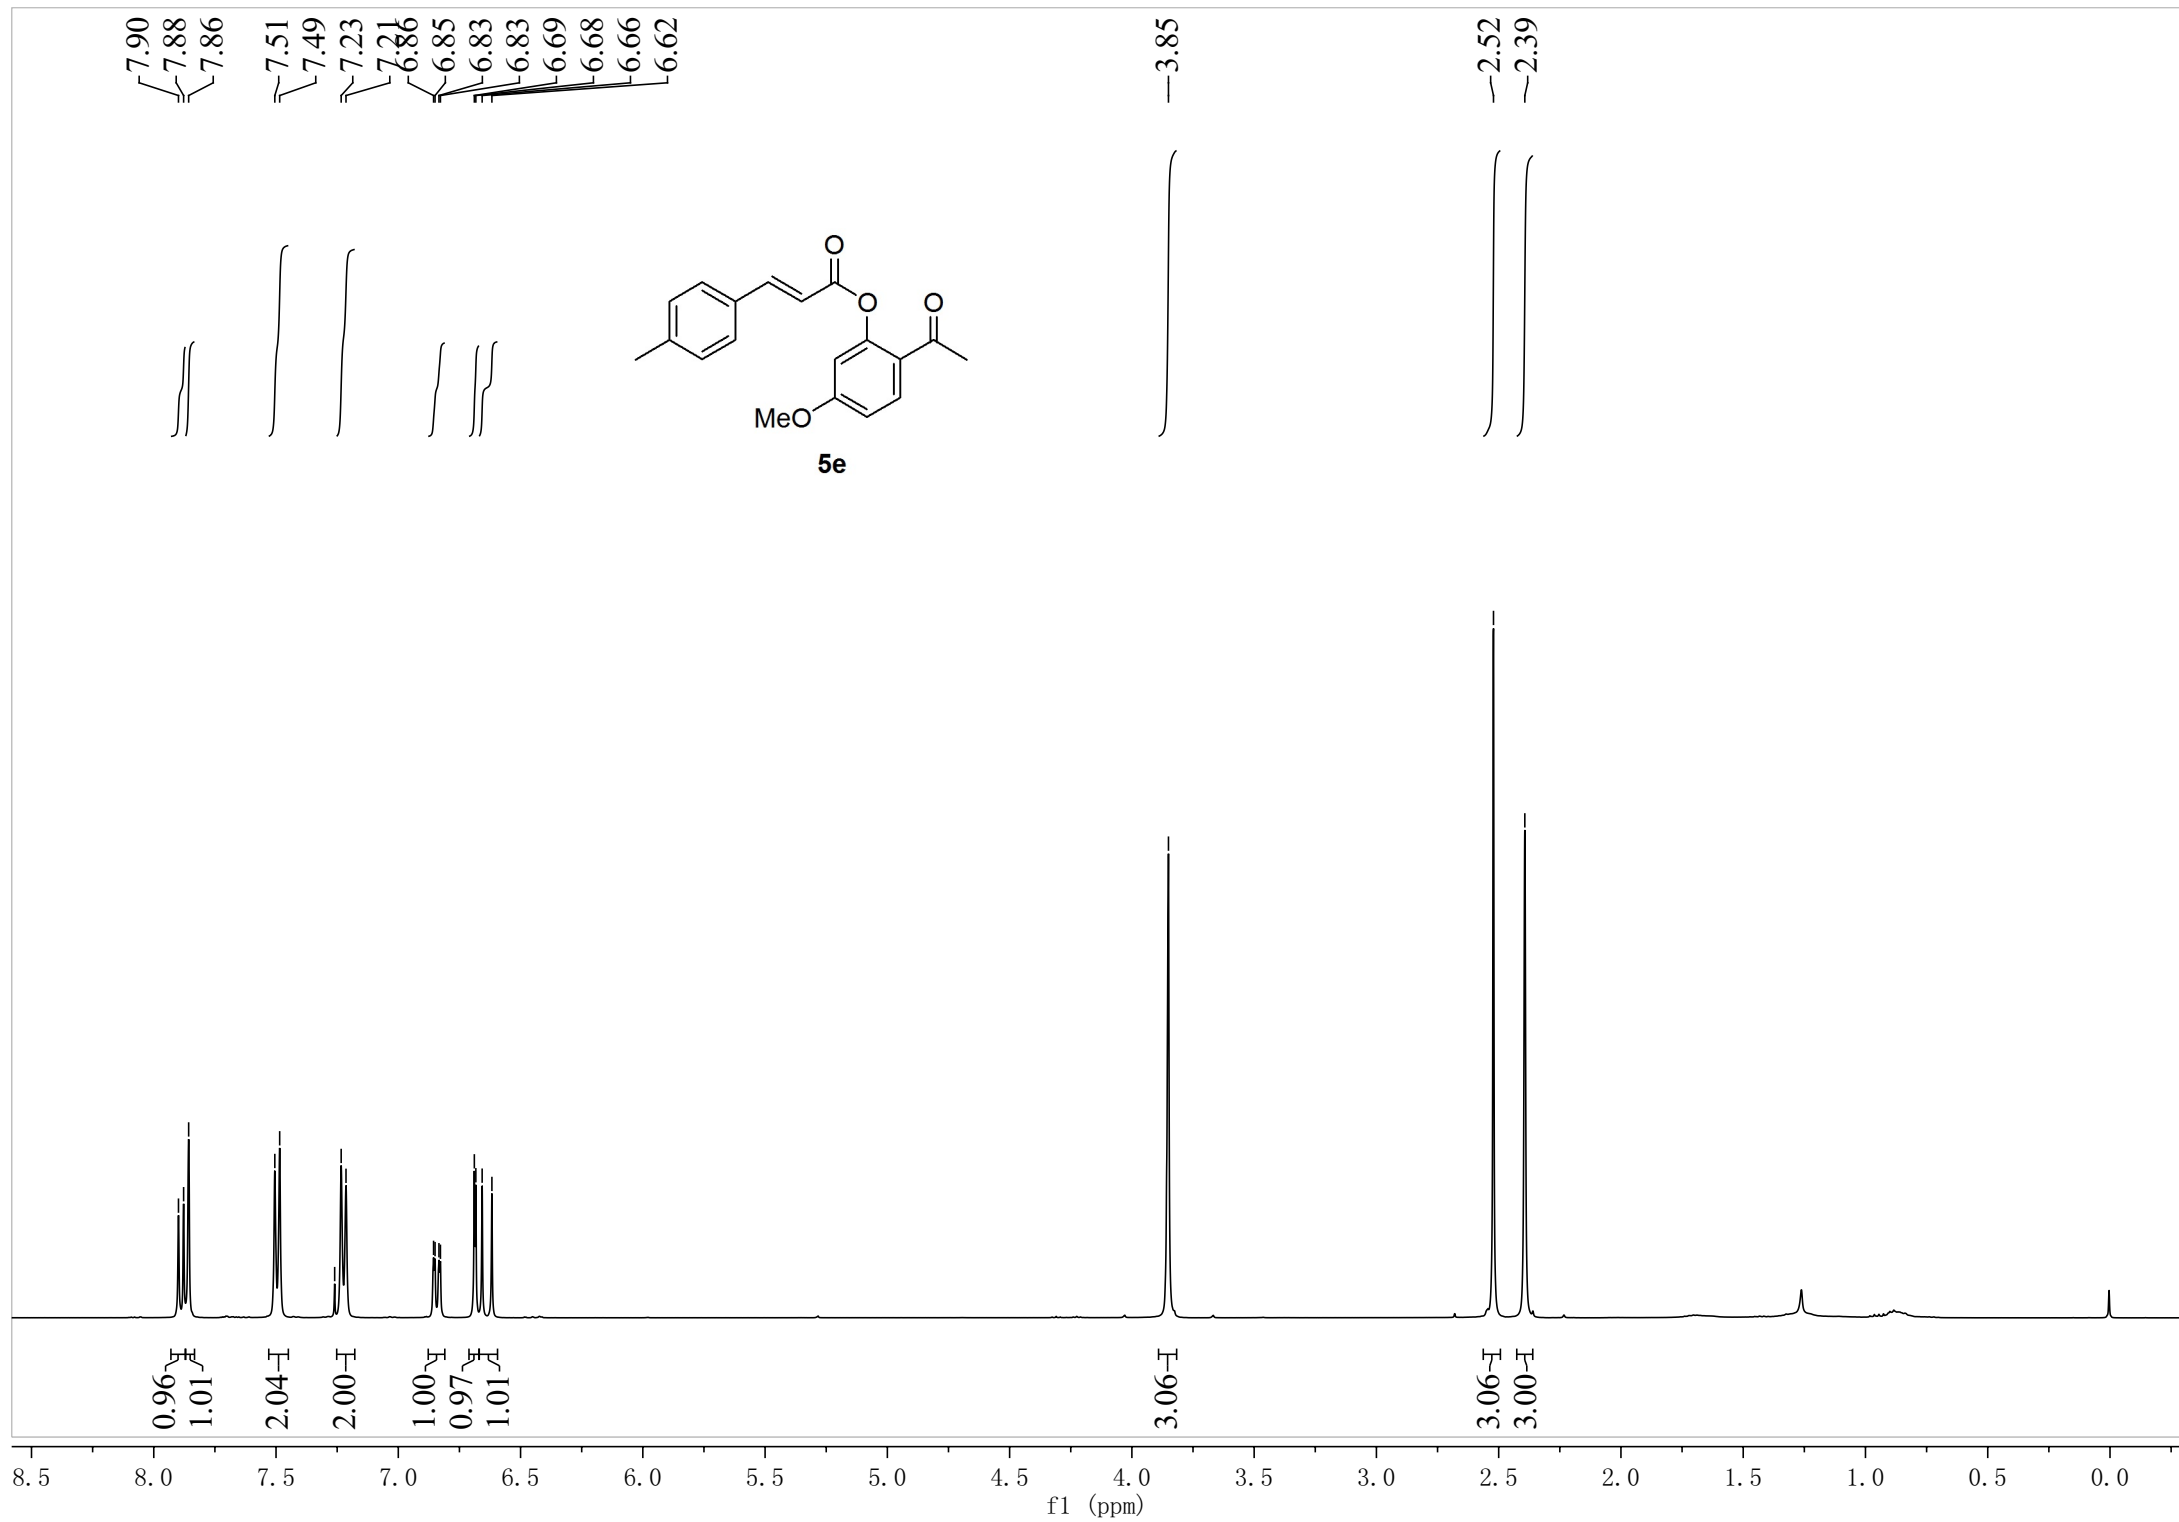

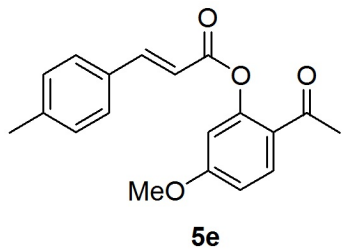

—195.90  
~165.38  
~163.76  
~151.59  
~147.44  
~141.48  
~132.31  
~131.43  
~129.80  
~128.53  
~123.80  
~115.83  
~111.94  
~109.21

—55.78

—29.67

—21.60

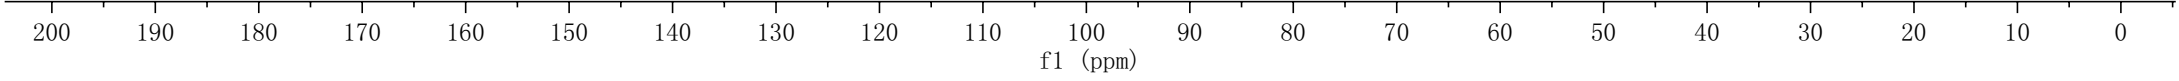

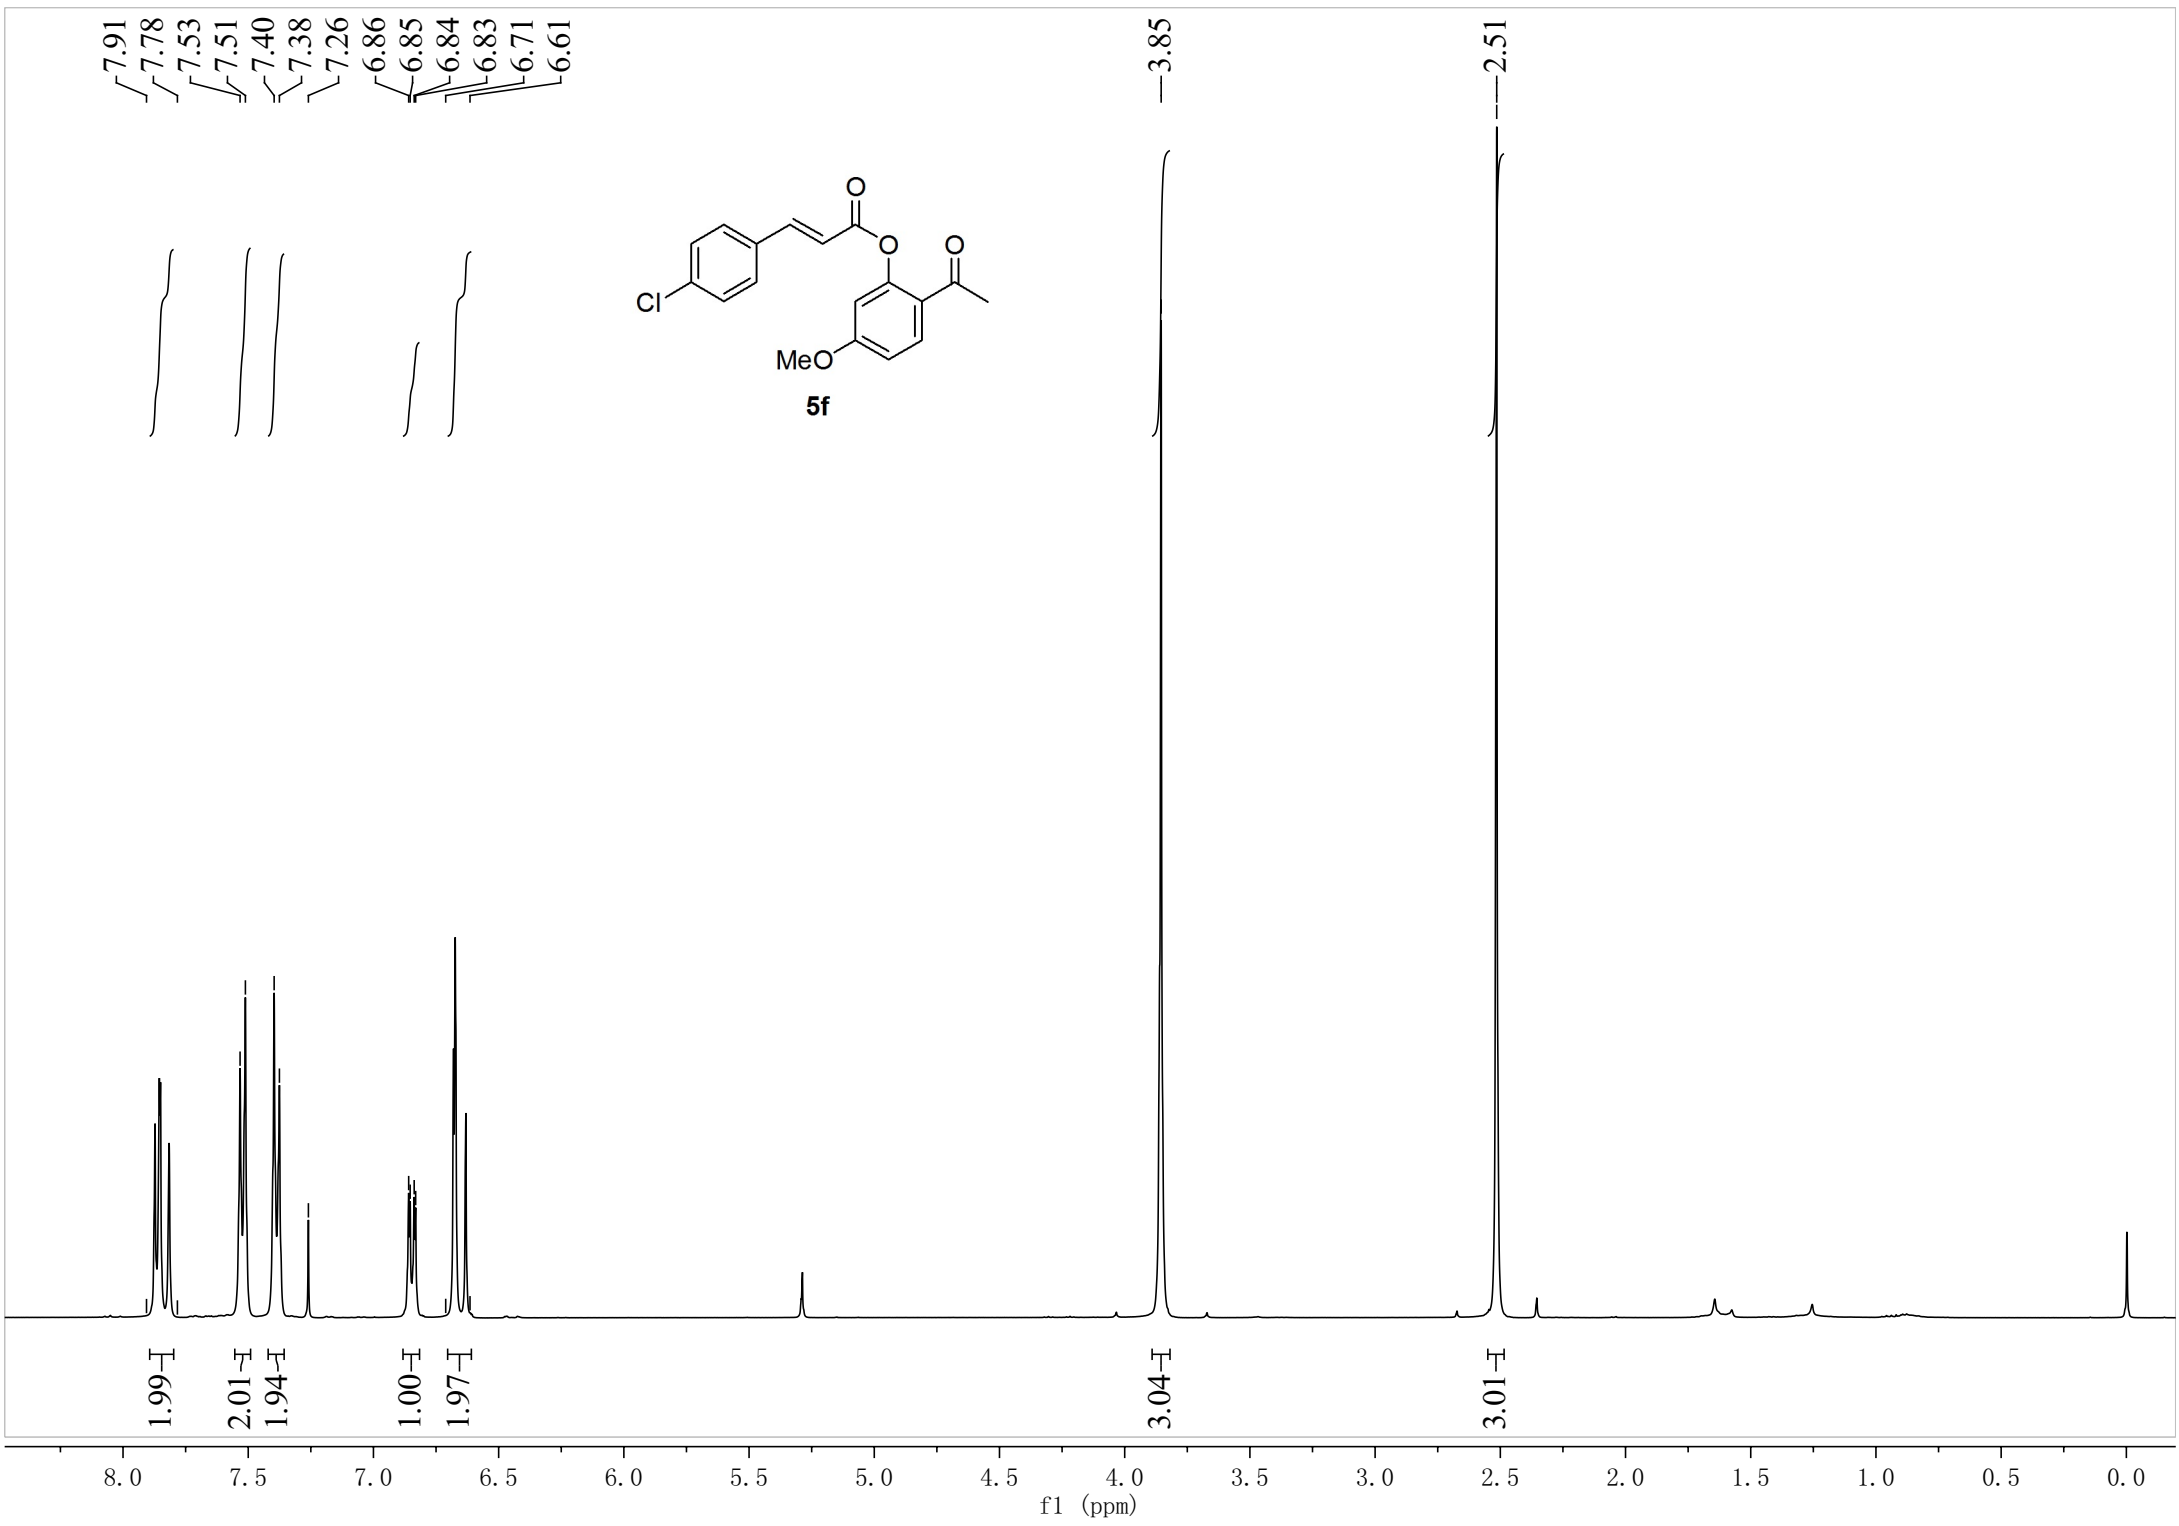

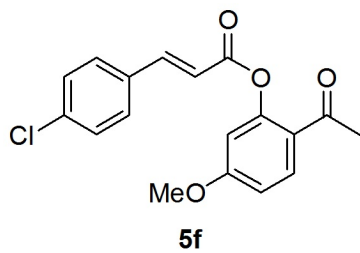

—195.88  
~165.04  
~163.84  
—151.44  
—145.78  
~136.85  
~132.71  
~132.48  
~129.67  
~129.37  
~123.56  
~117.68  
—111.93  
~109.34

—55.83

—29.45

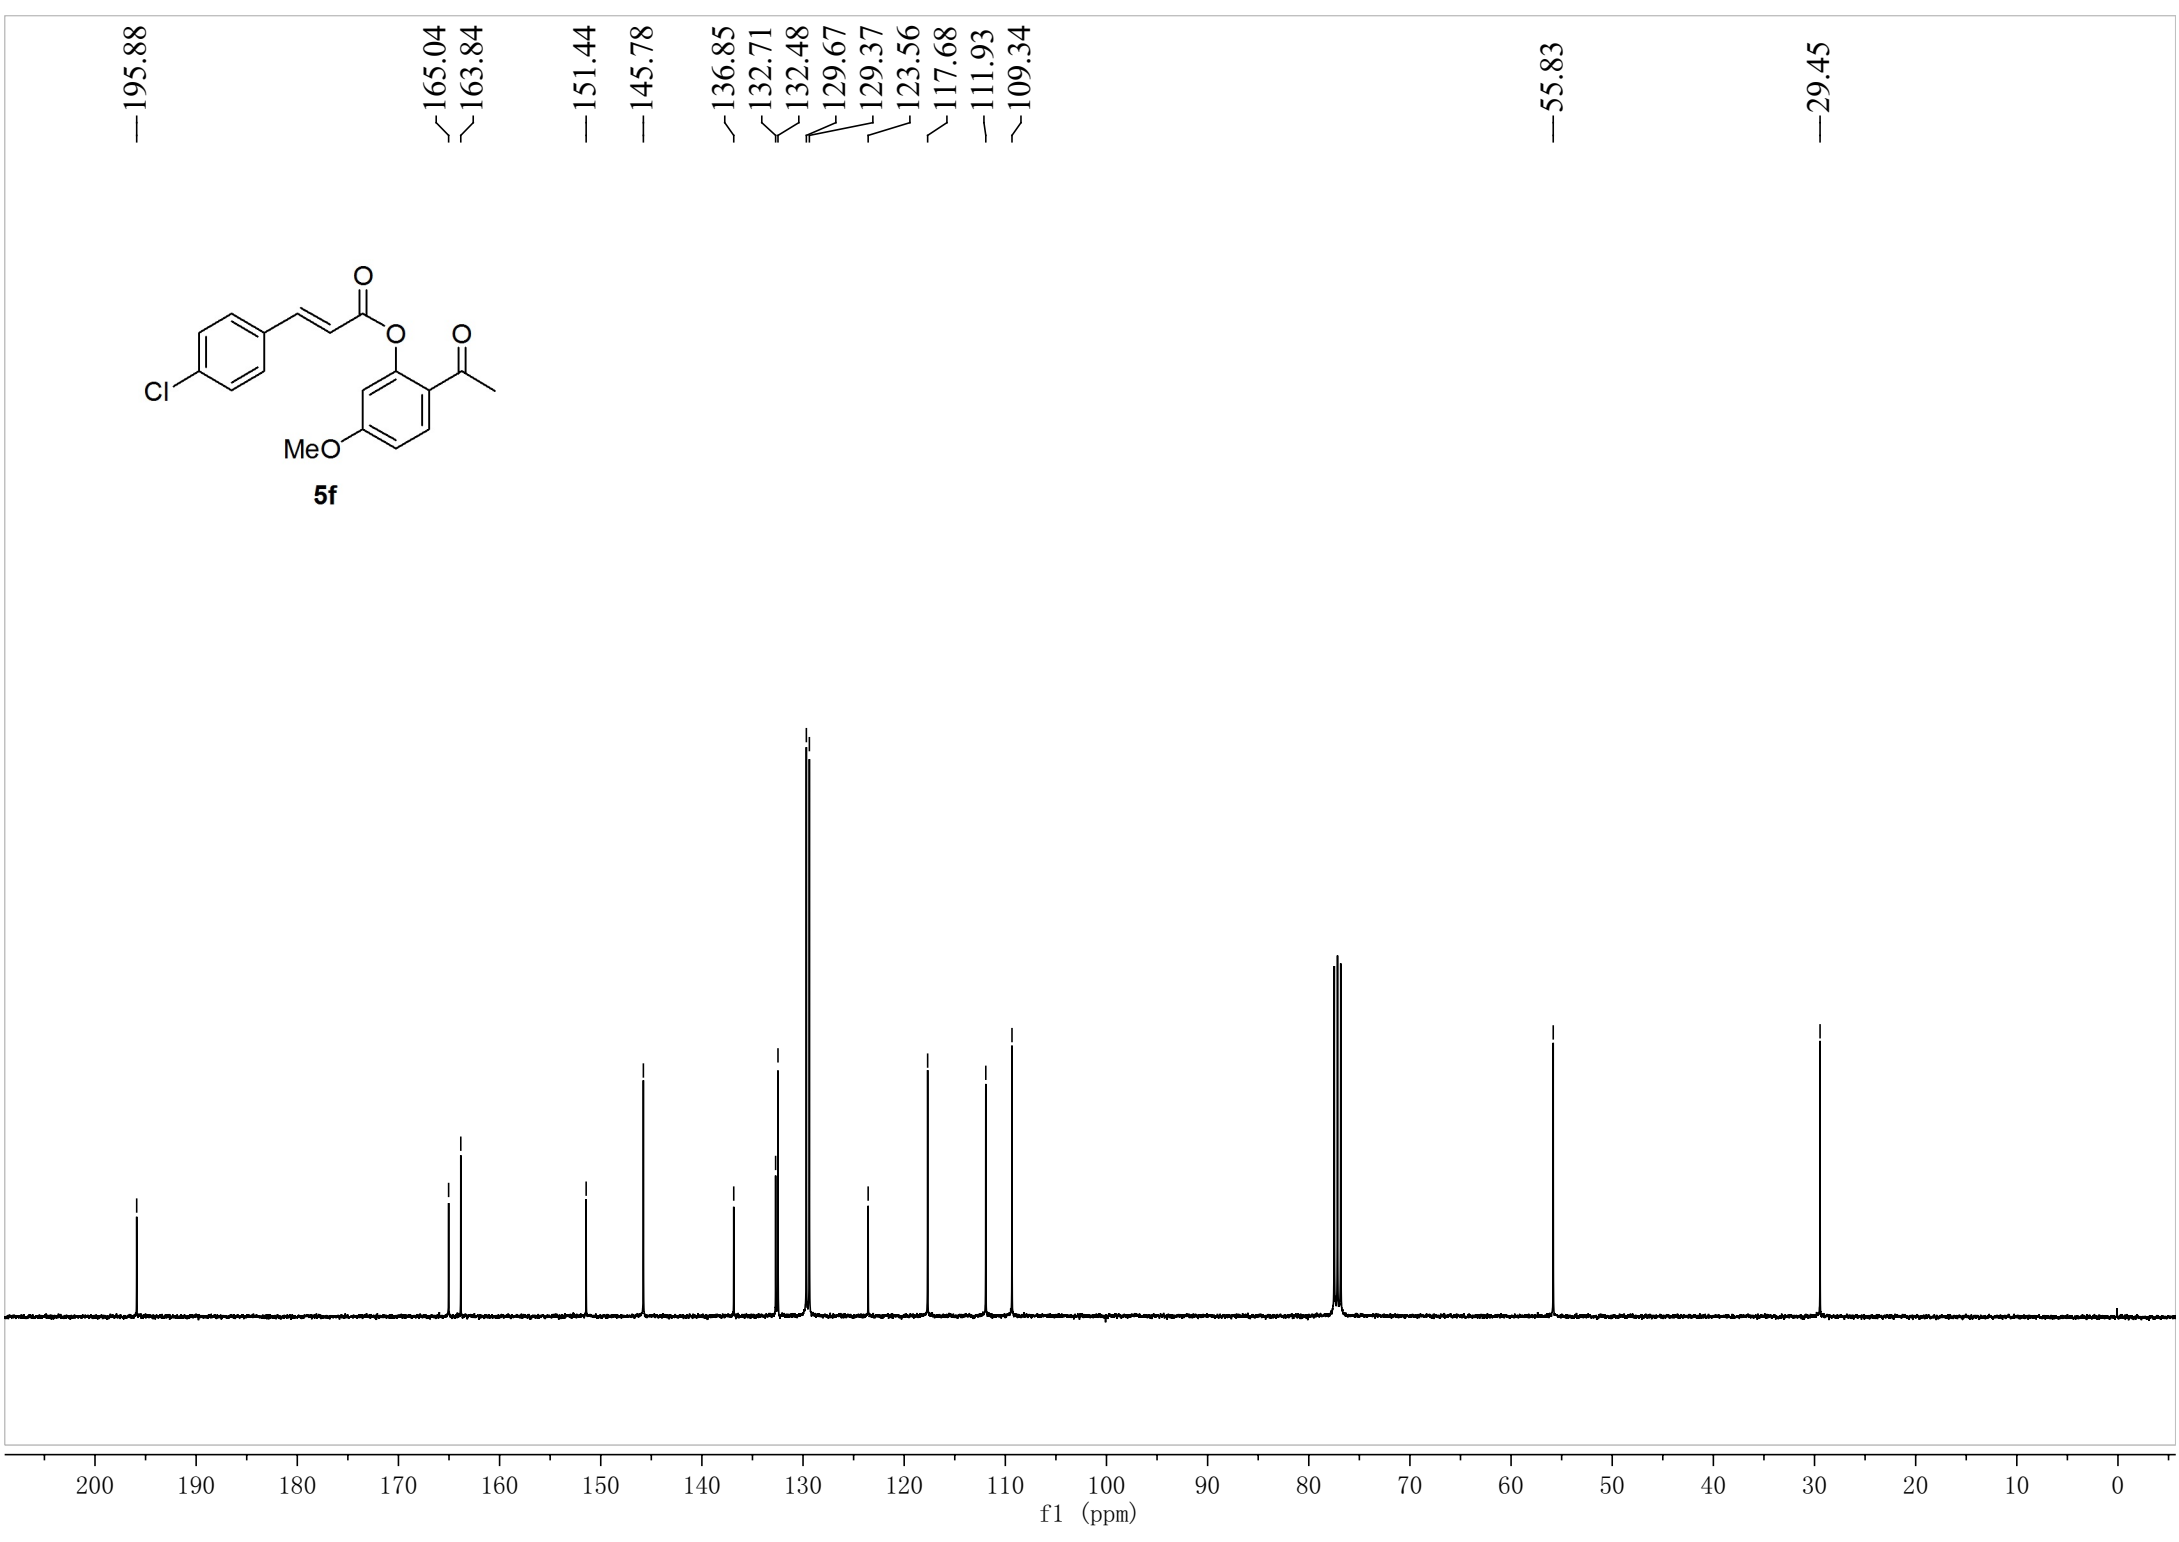



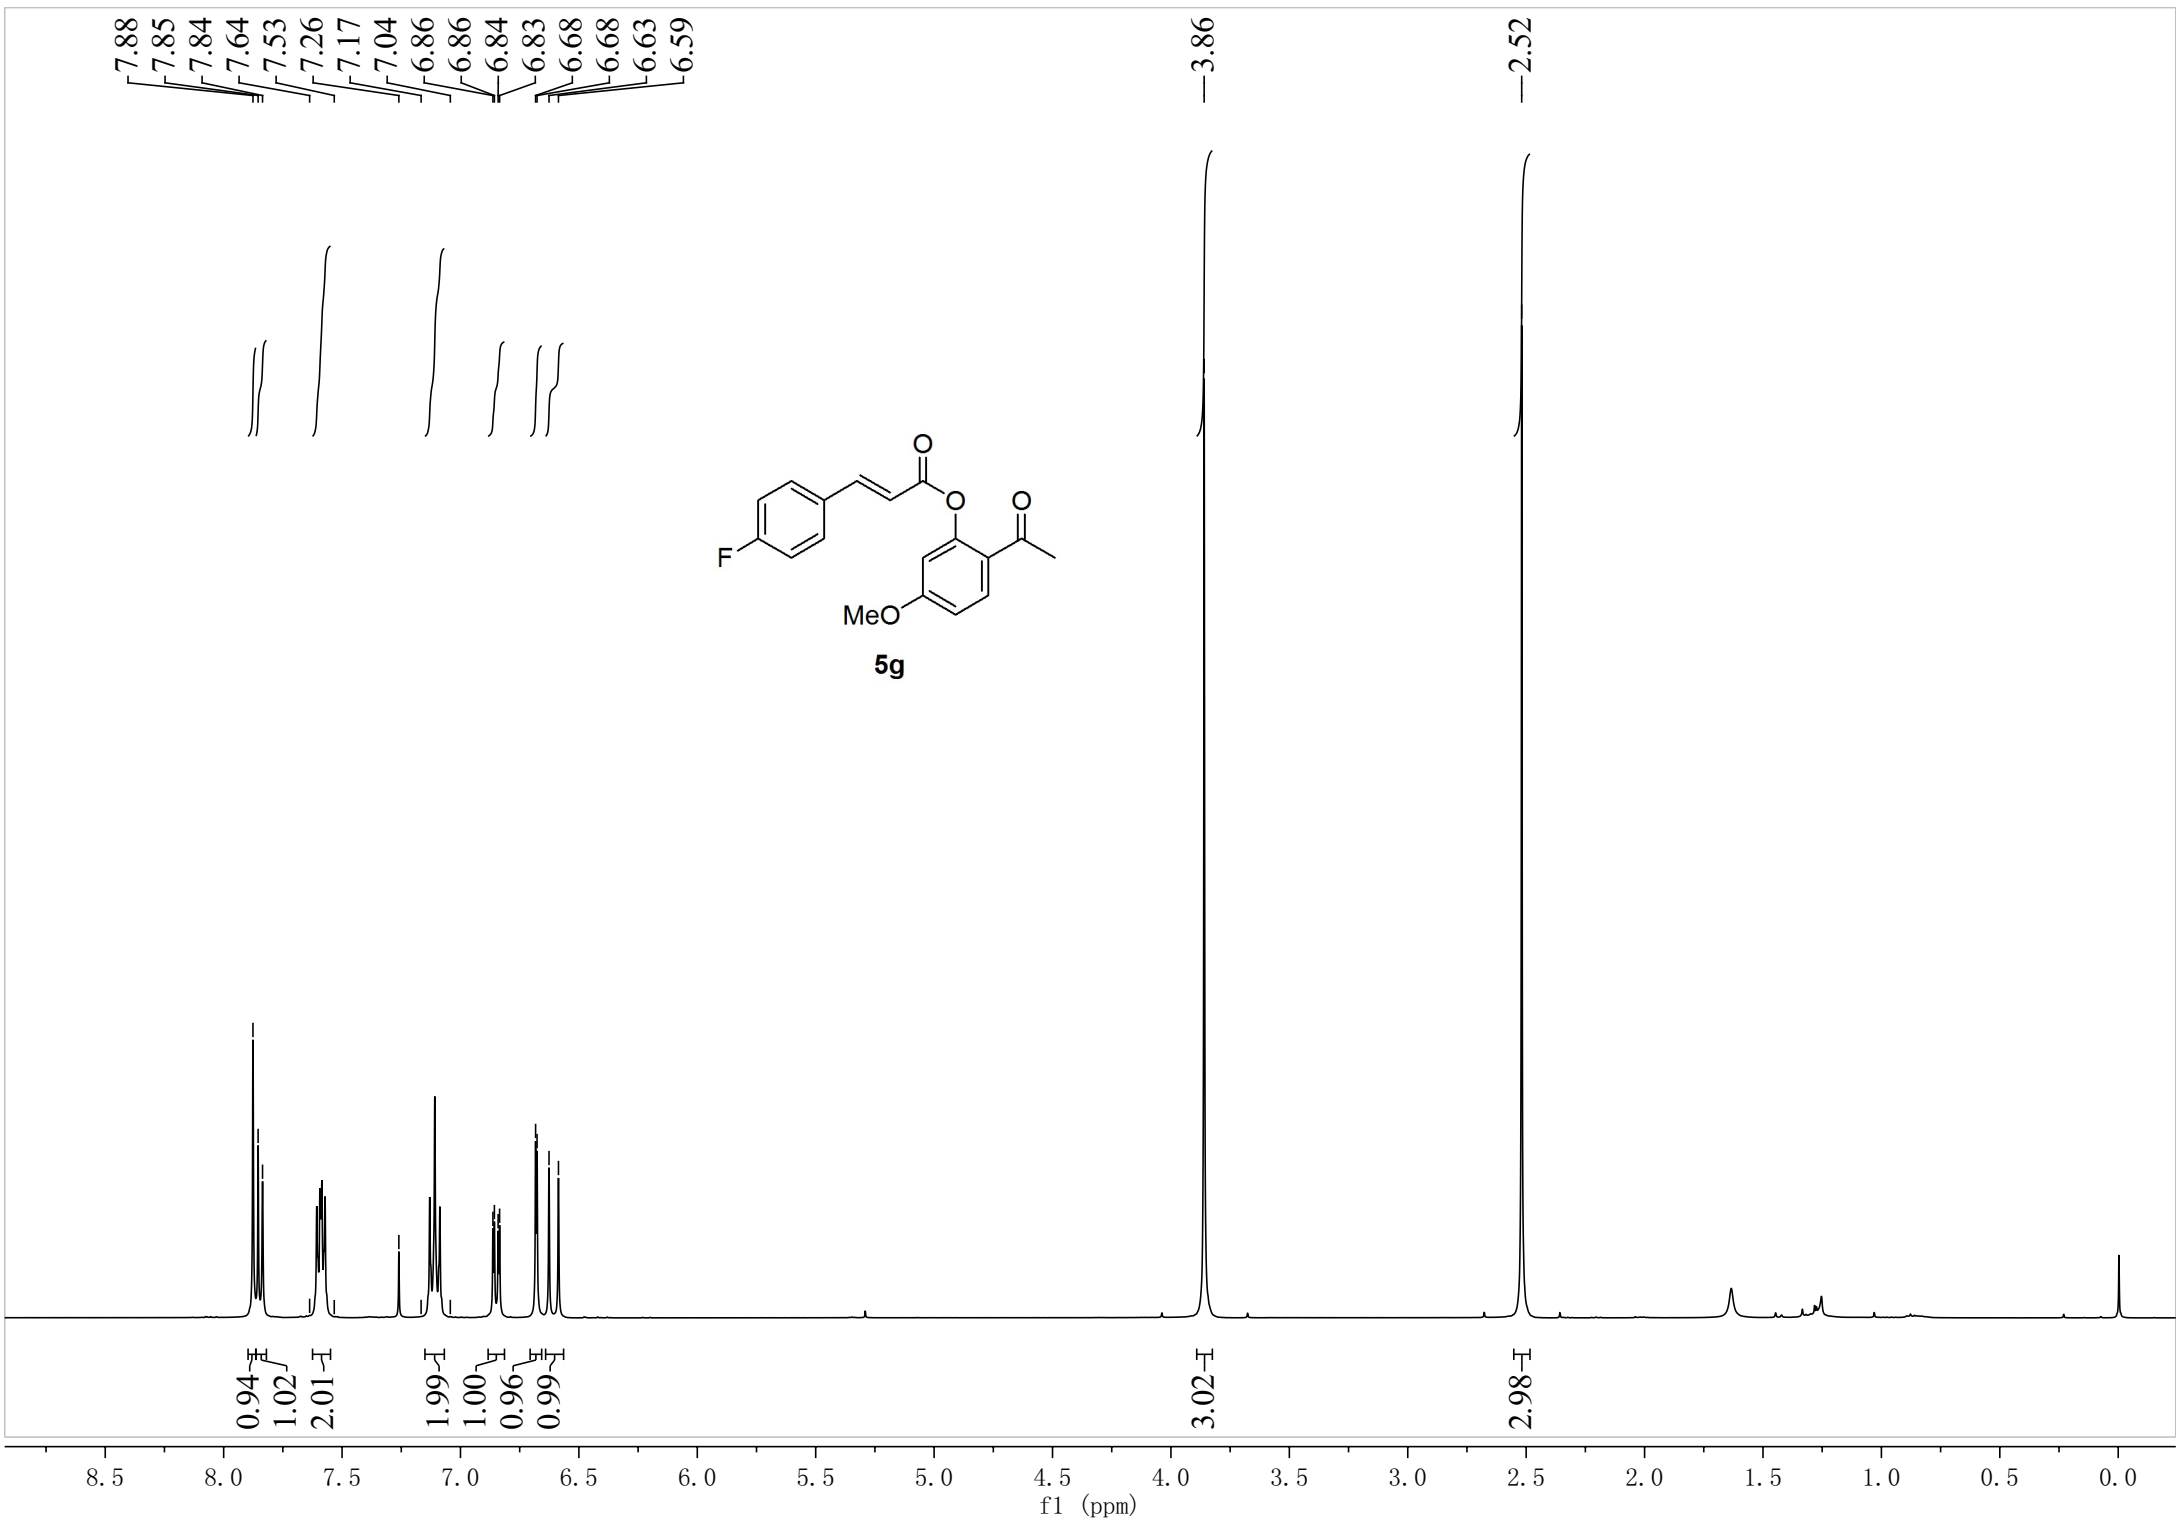

—195.97

165.59

165.20

163.85

163.08

—151.50

—146.02

132.48

130.54

130.51

130.47

130.45

123.62

116.82

116.80

116.40

116.18

111.96

109.33

—55.86

—29.53

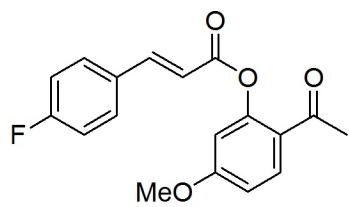

**5g**

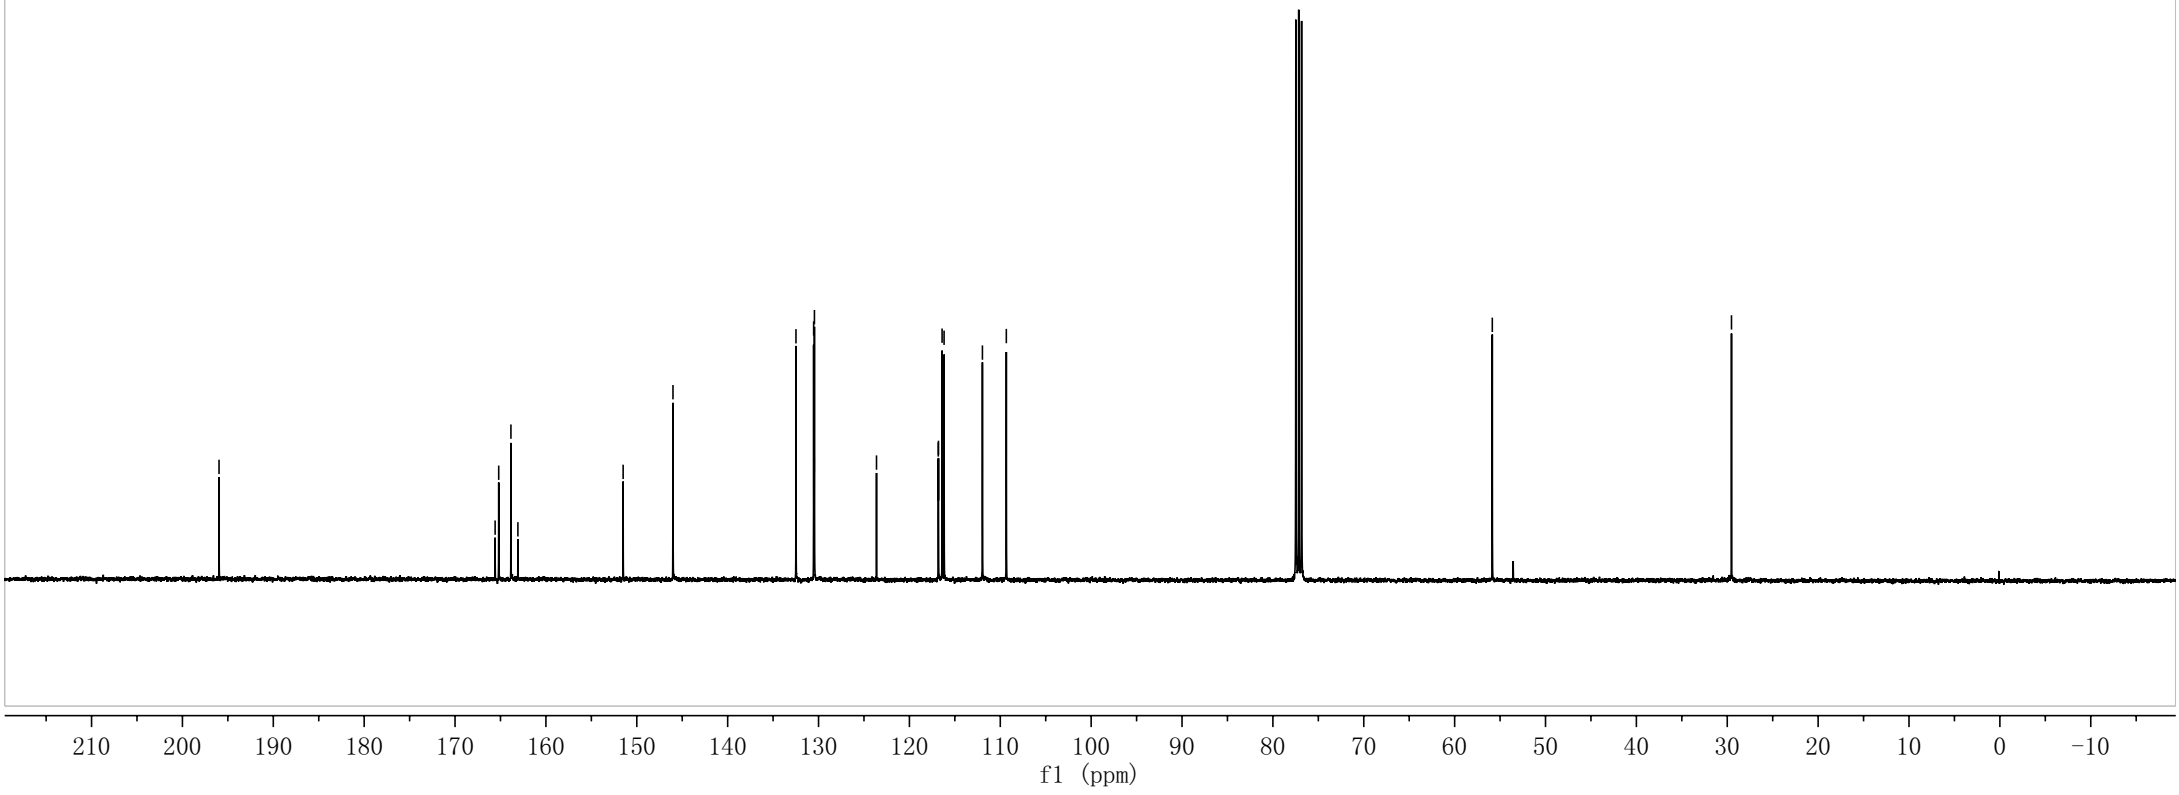

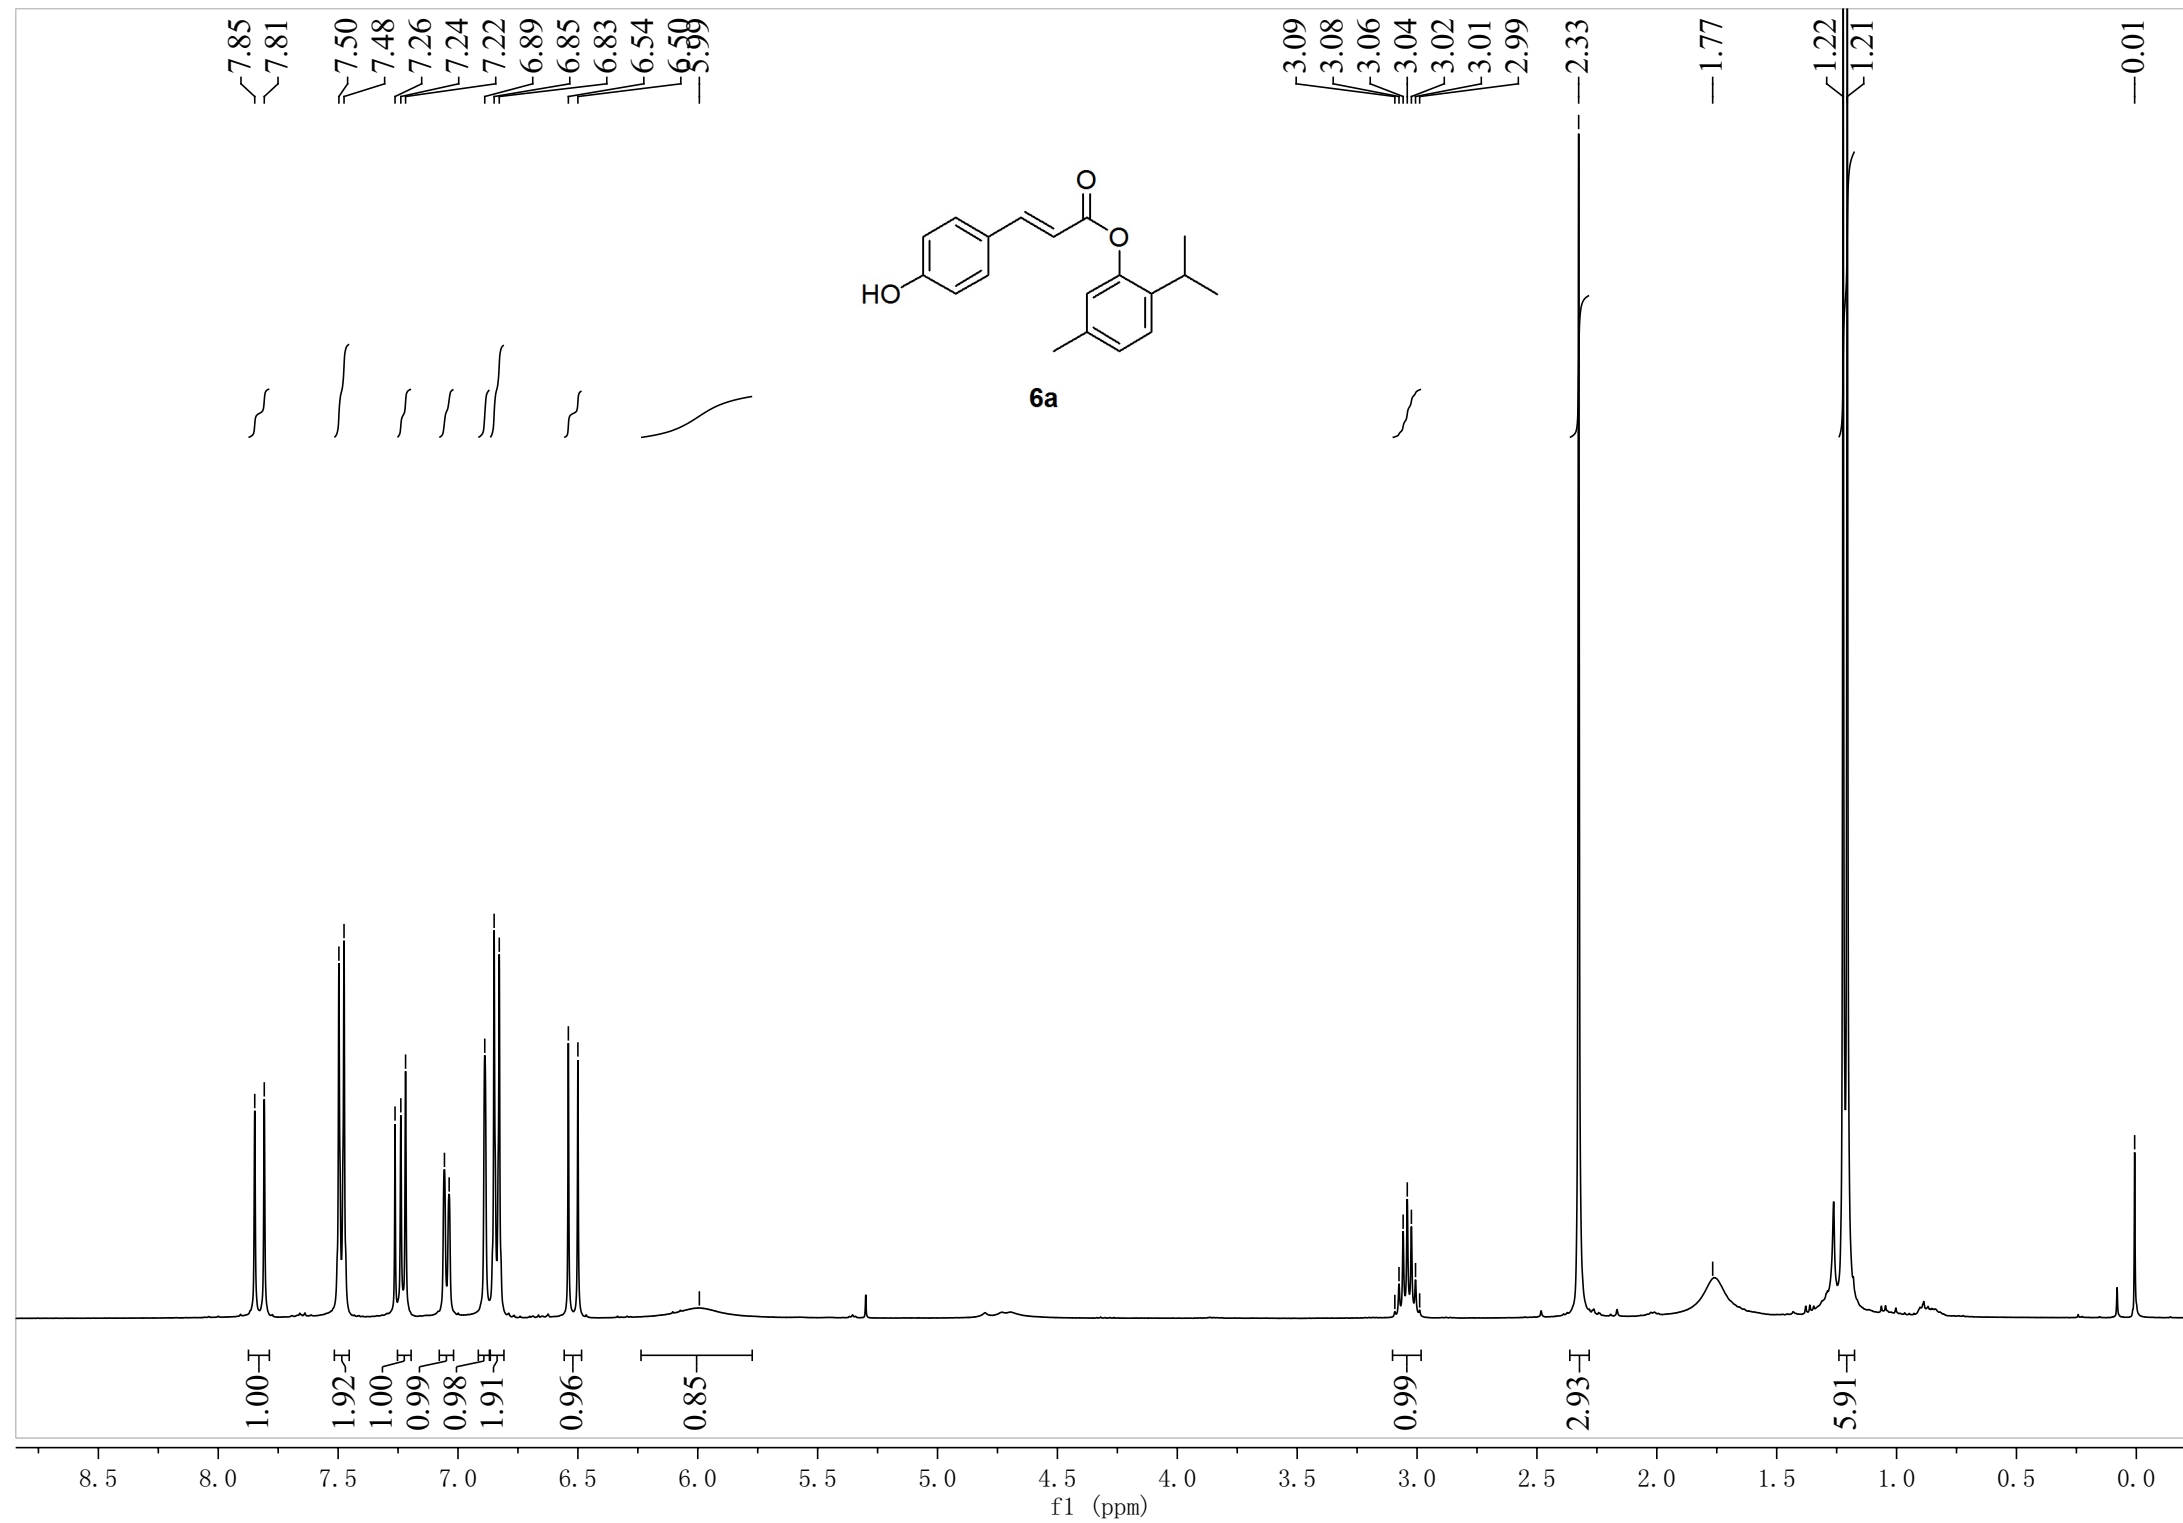

—166.62  
—158.47  
~148.13  
~146.59  
~137.38  
~136.75  
~130.42  
~127.26  
~126.62  
~122.96  
~116.14  
~114.50

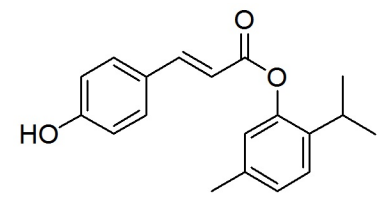

6a

—27.32  
~23.21  
—20.97

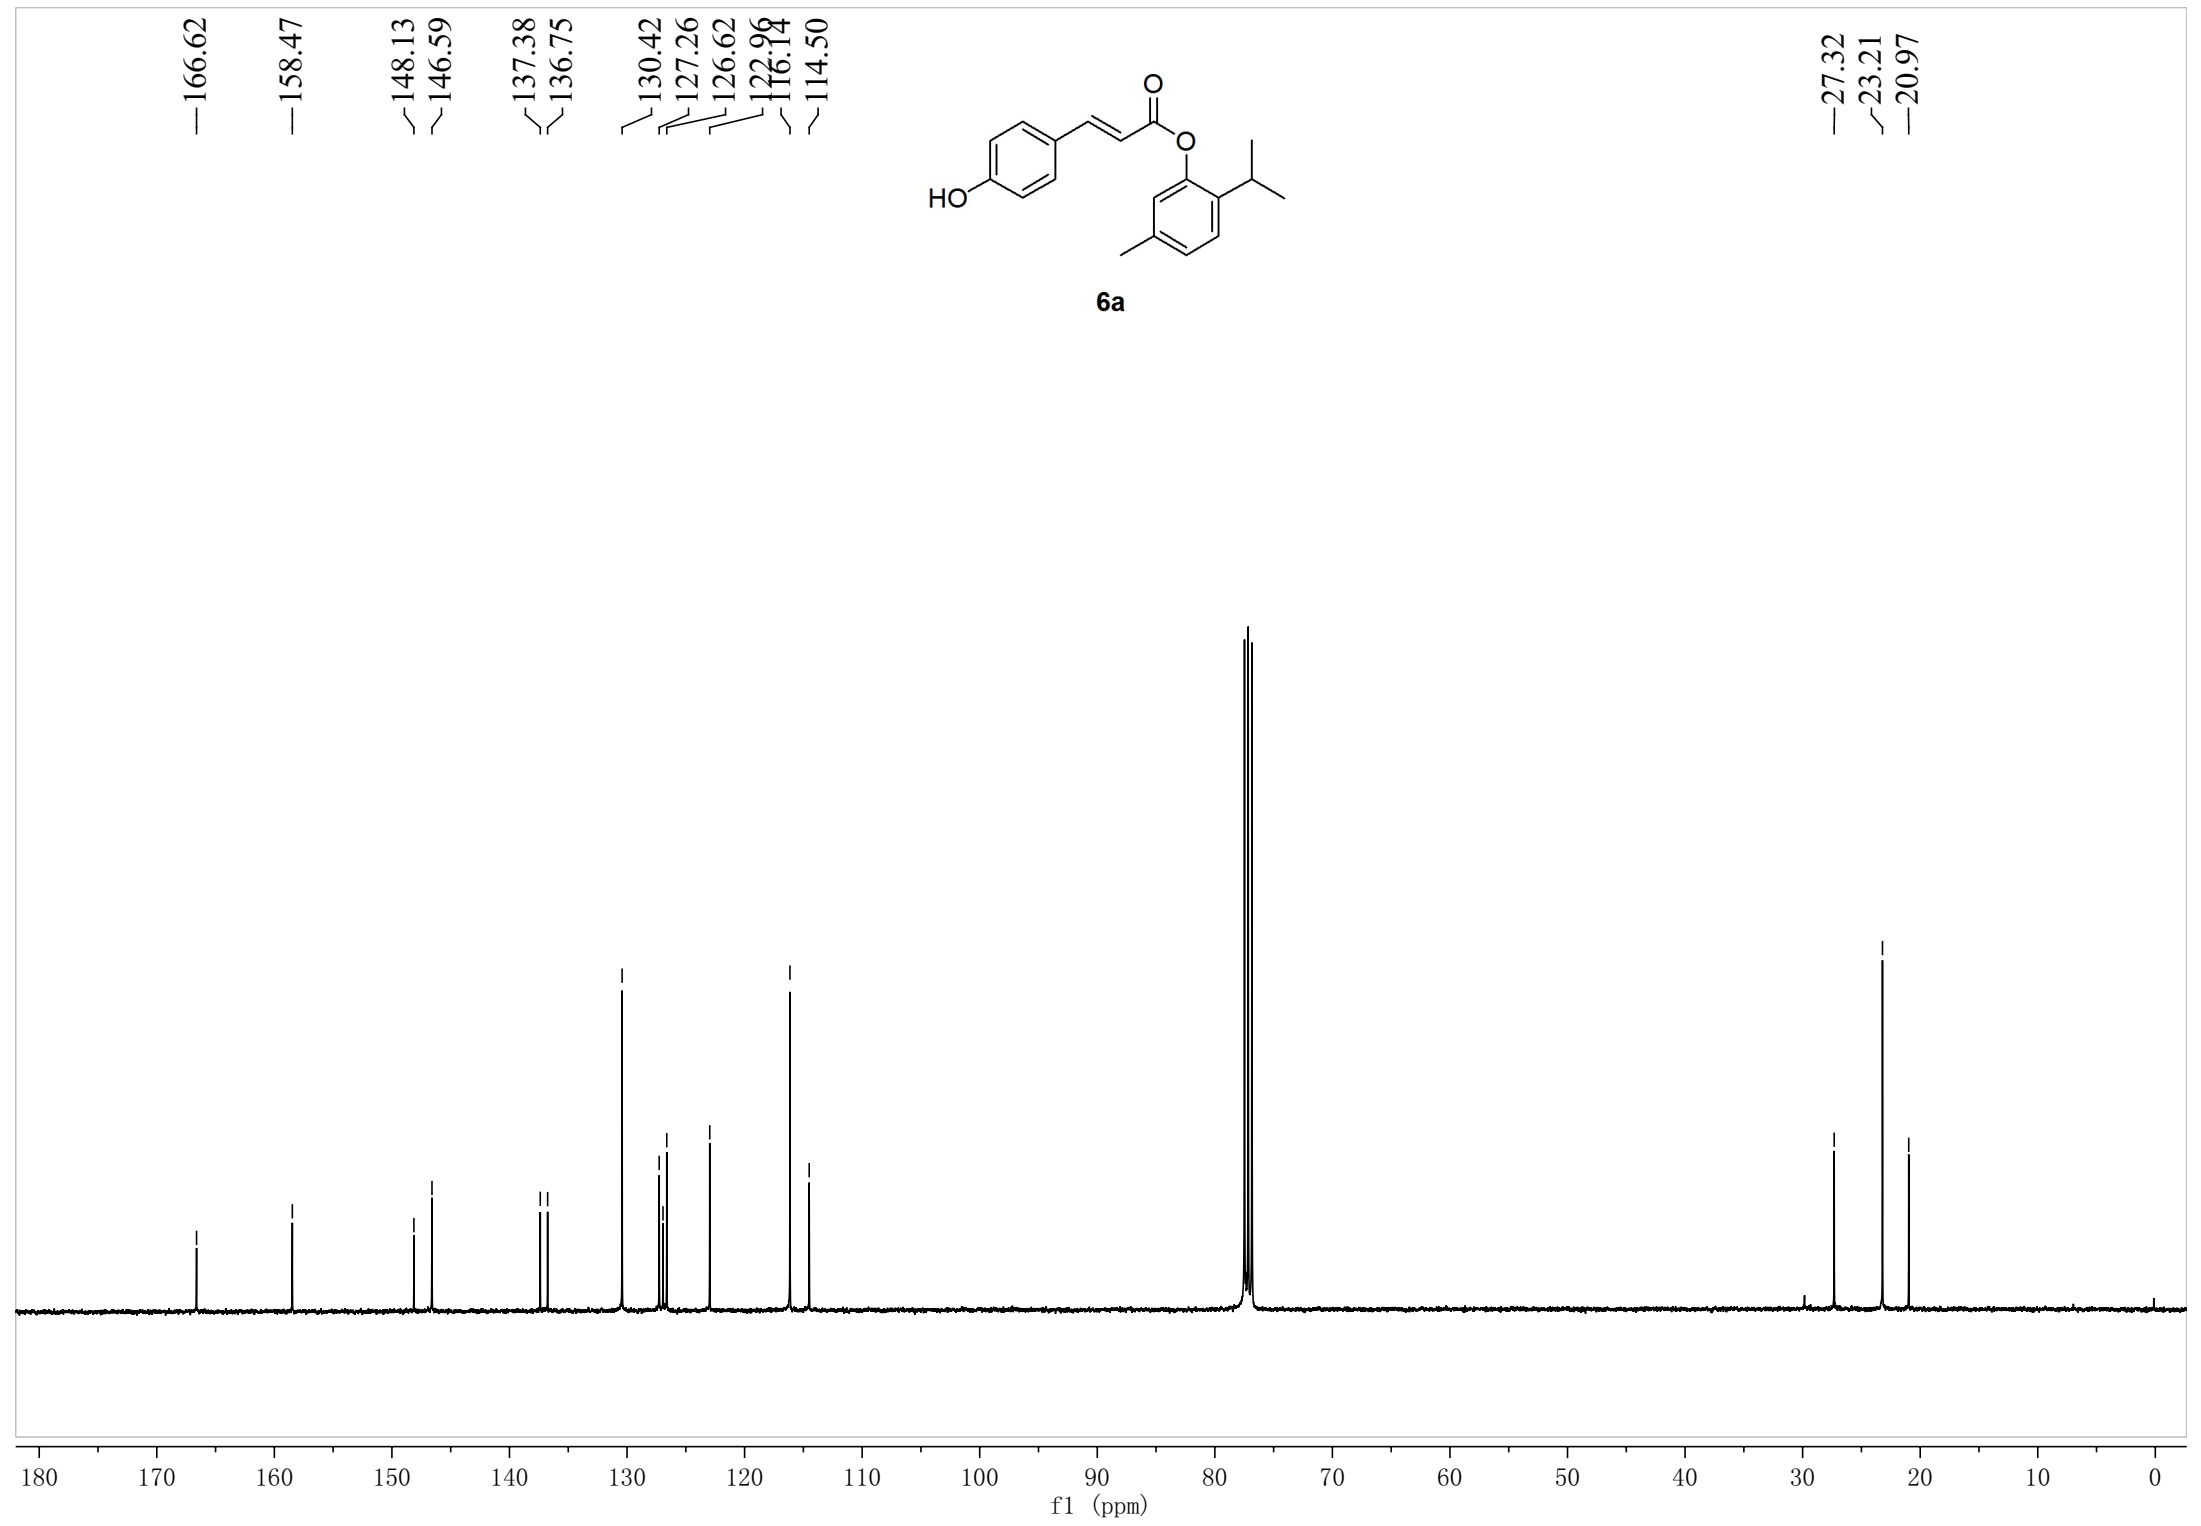

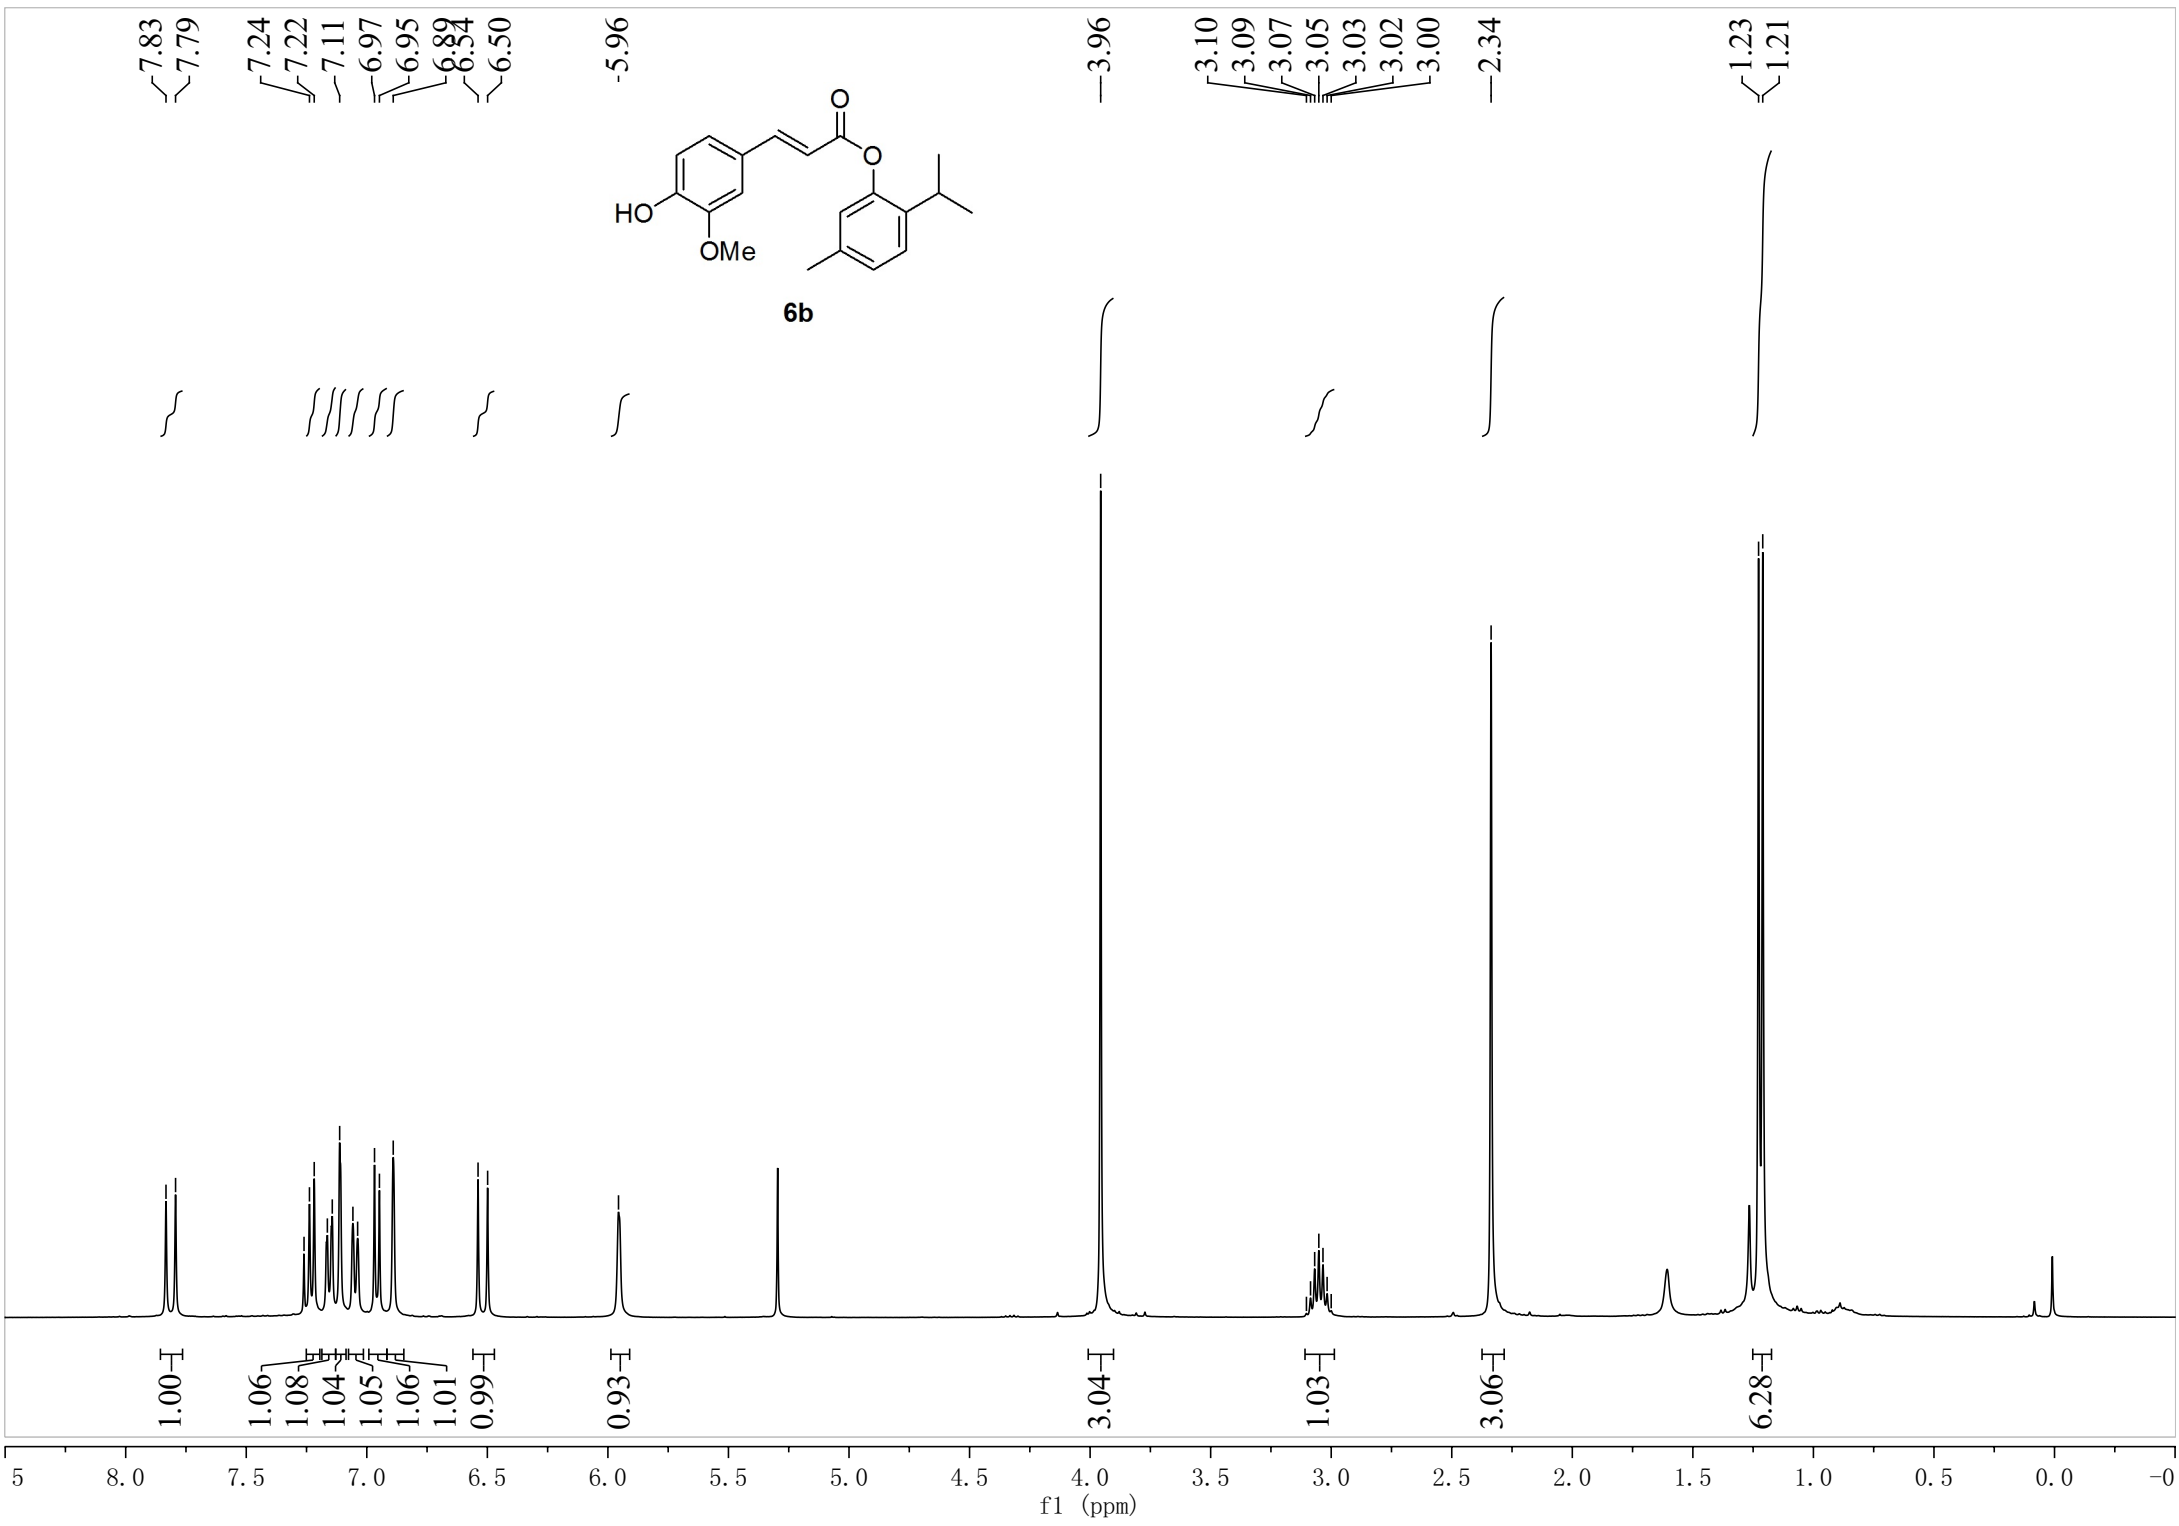

—166.12

148.50

148.21

147.02

146.63

137.39

136.68

127.19

127.09

126.58

123.58

123.01

114.99

114.80

~109.72

—56.15

~27.32

23.22

—20.98

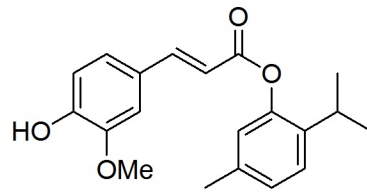

**6b**

170 160 150 140 130 120 110 100 90 80 70 60 50 40 30 20 10 0

f1 (ppm)

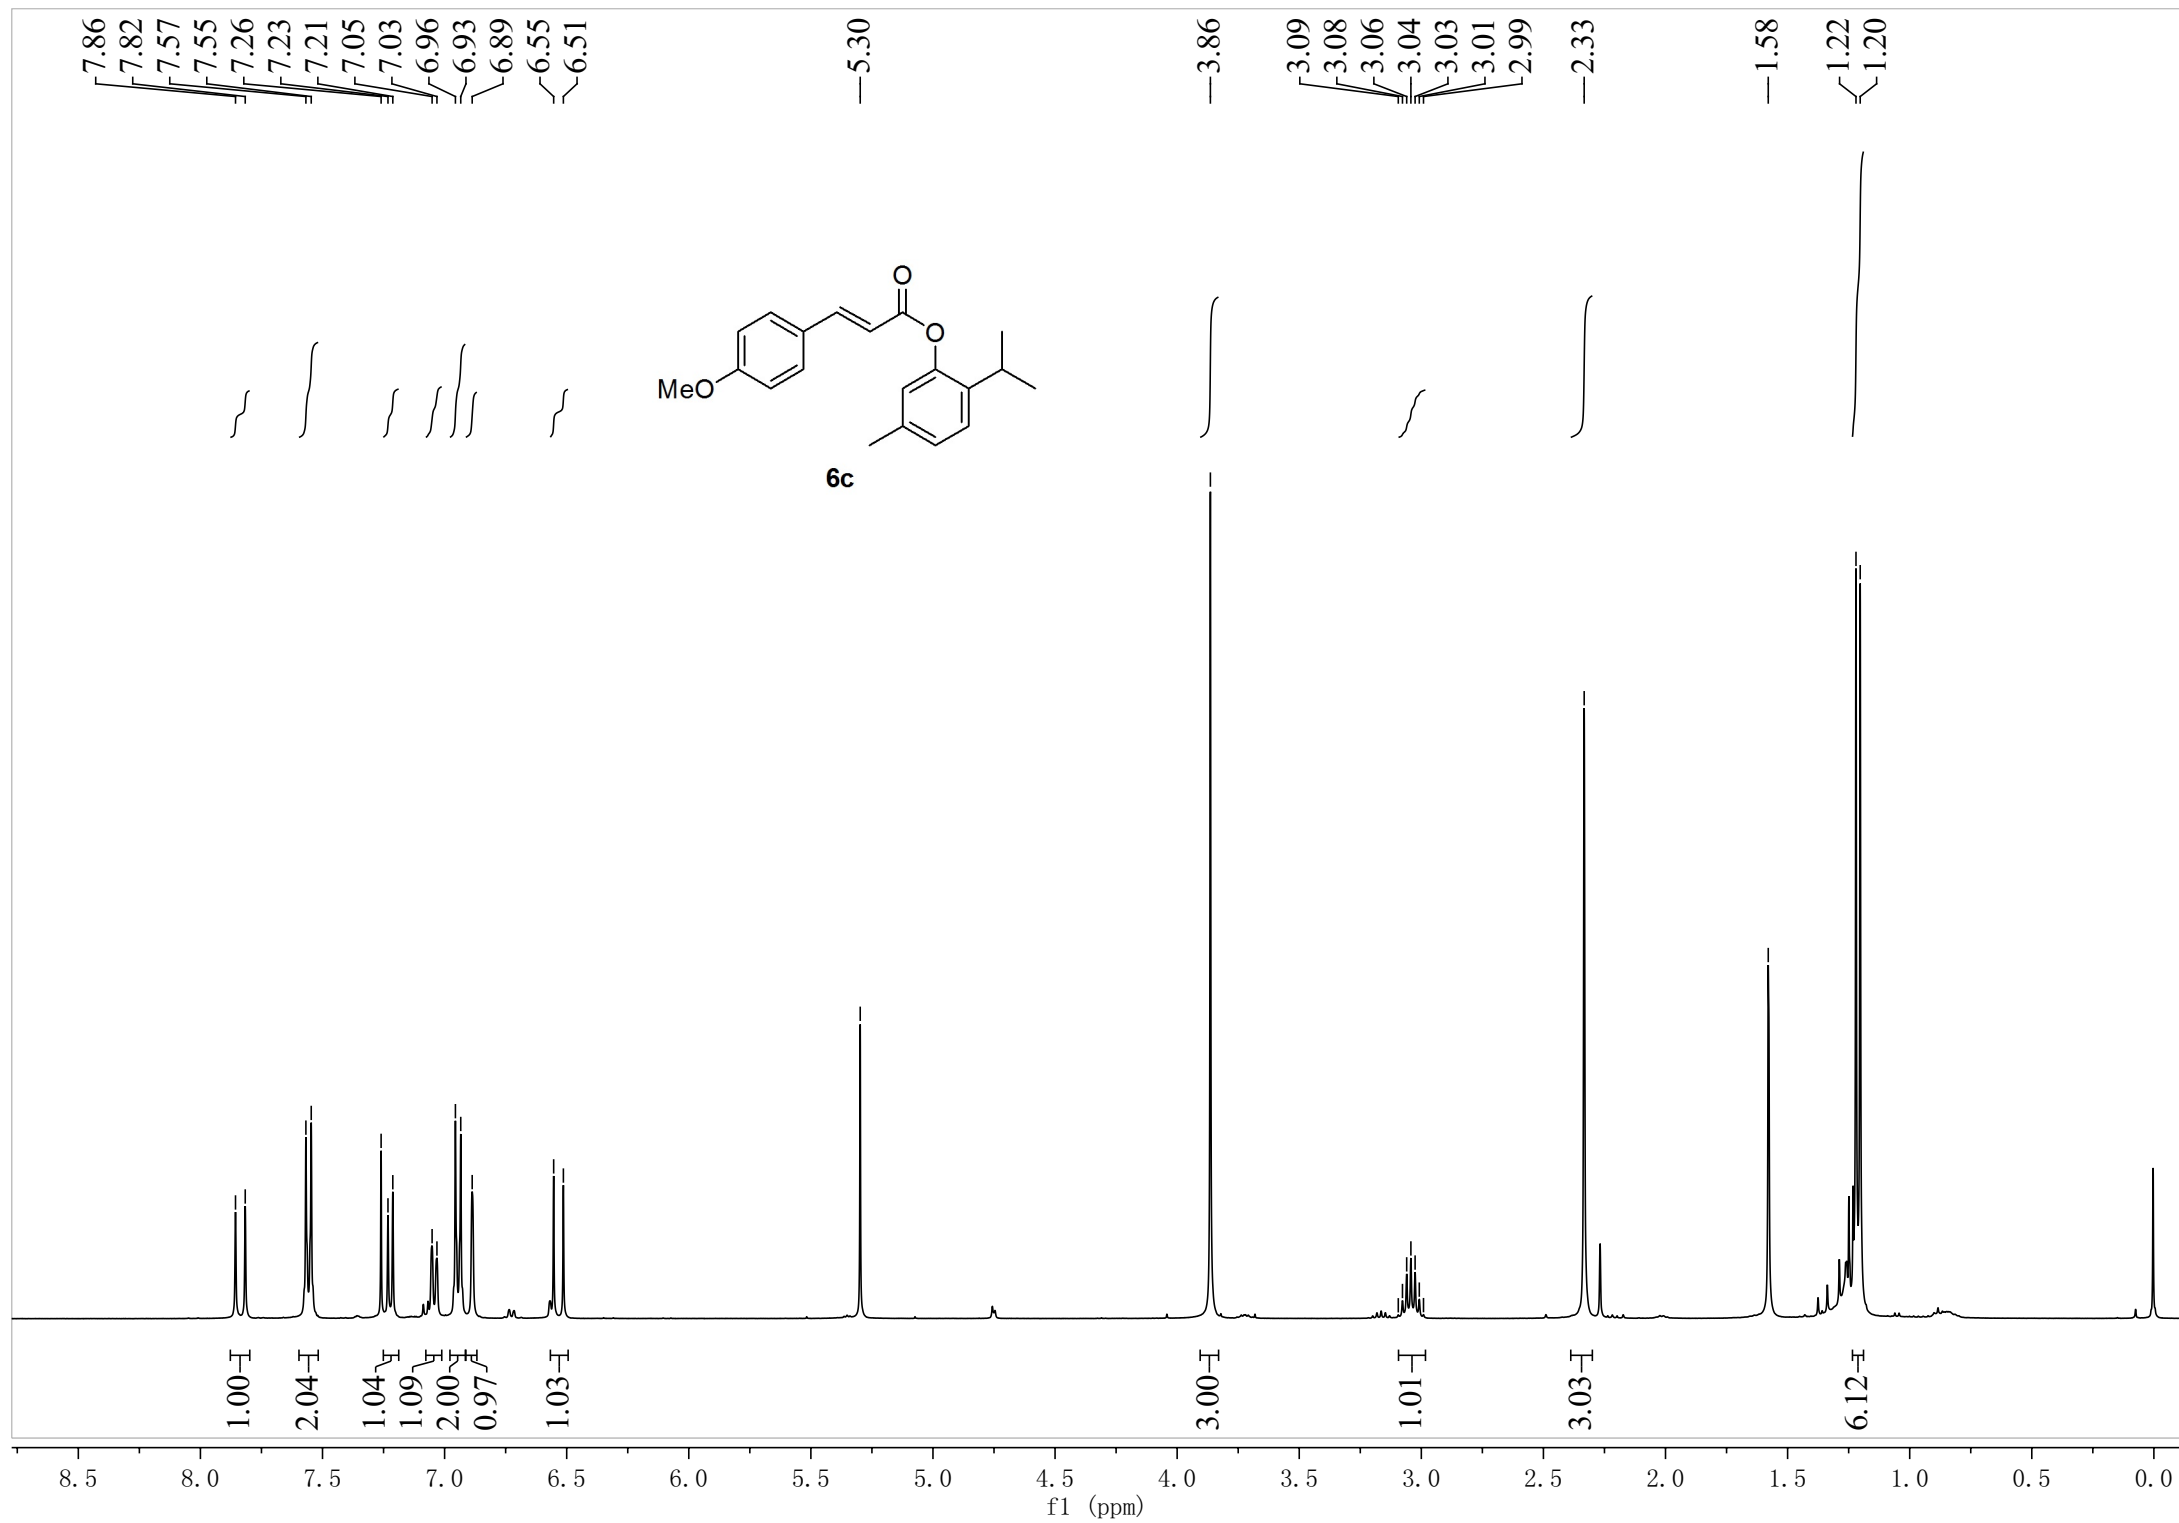

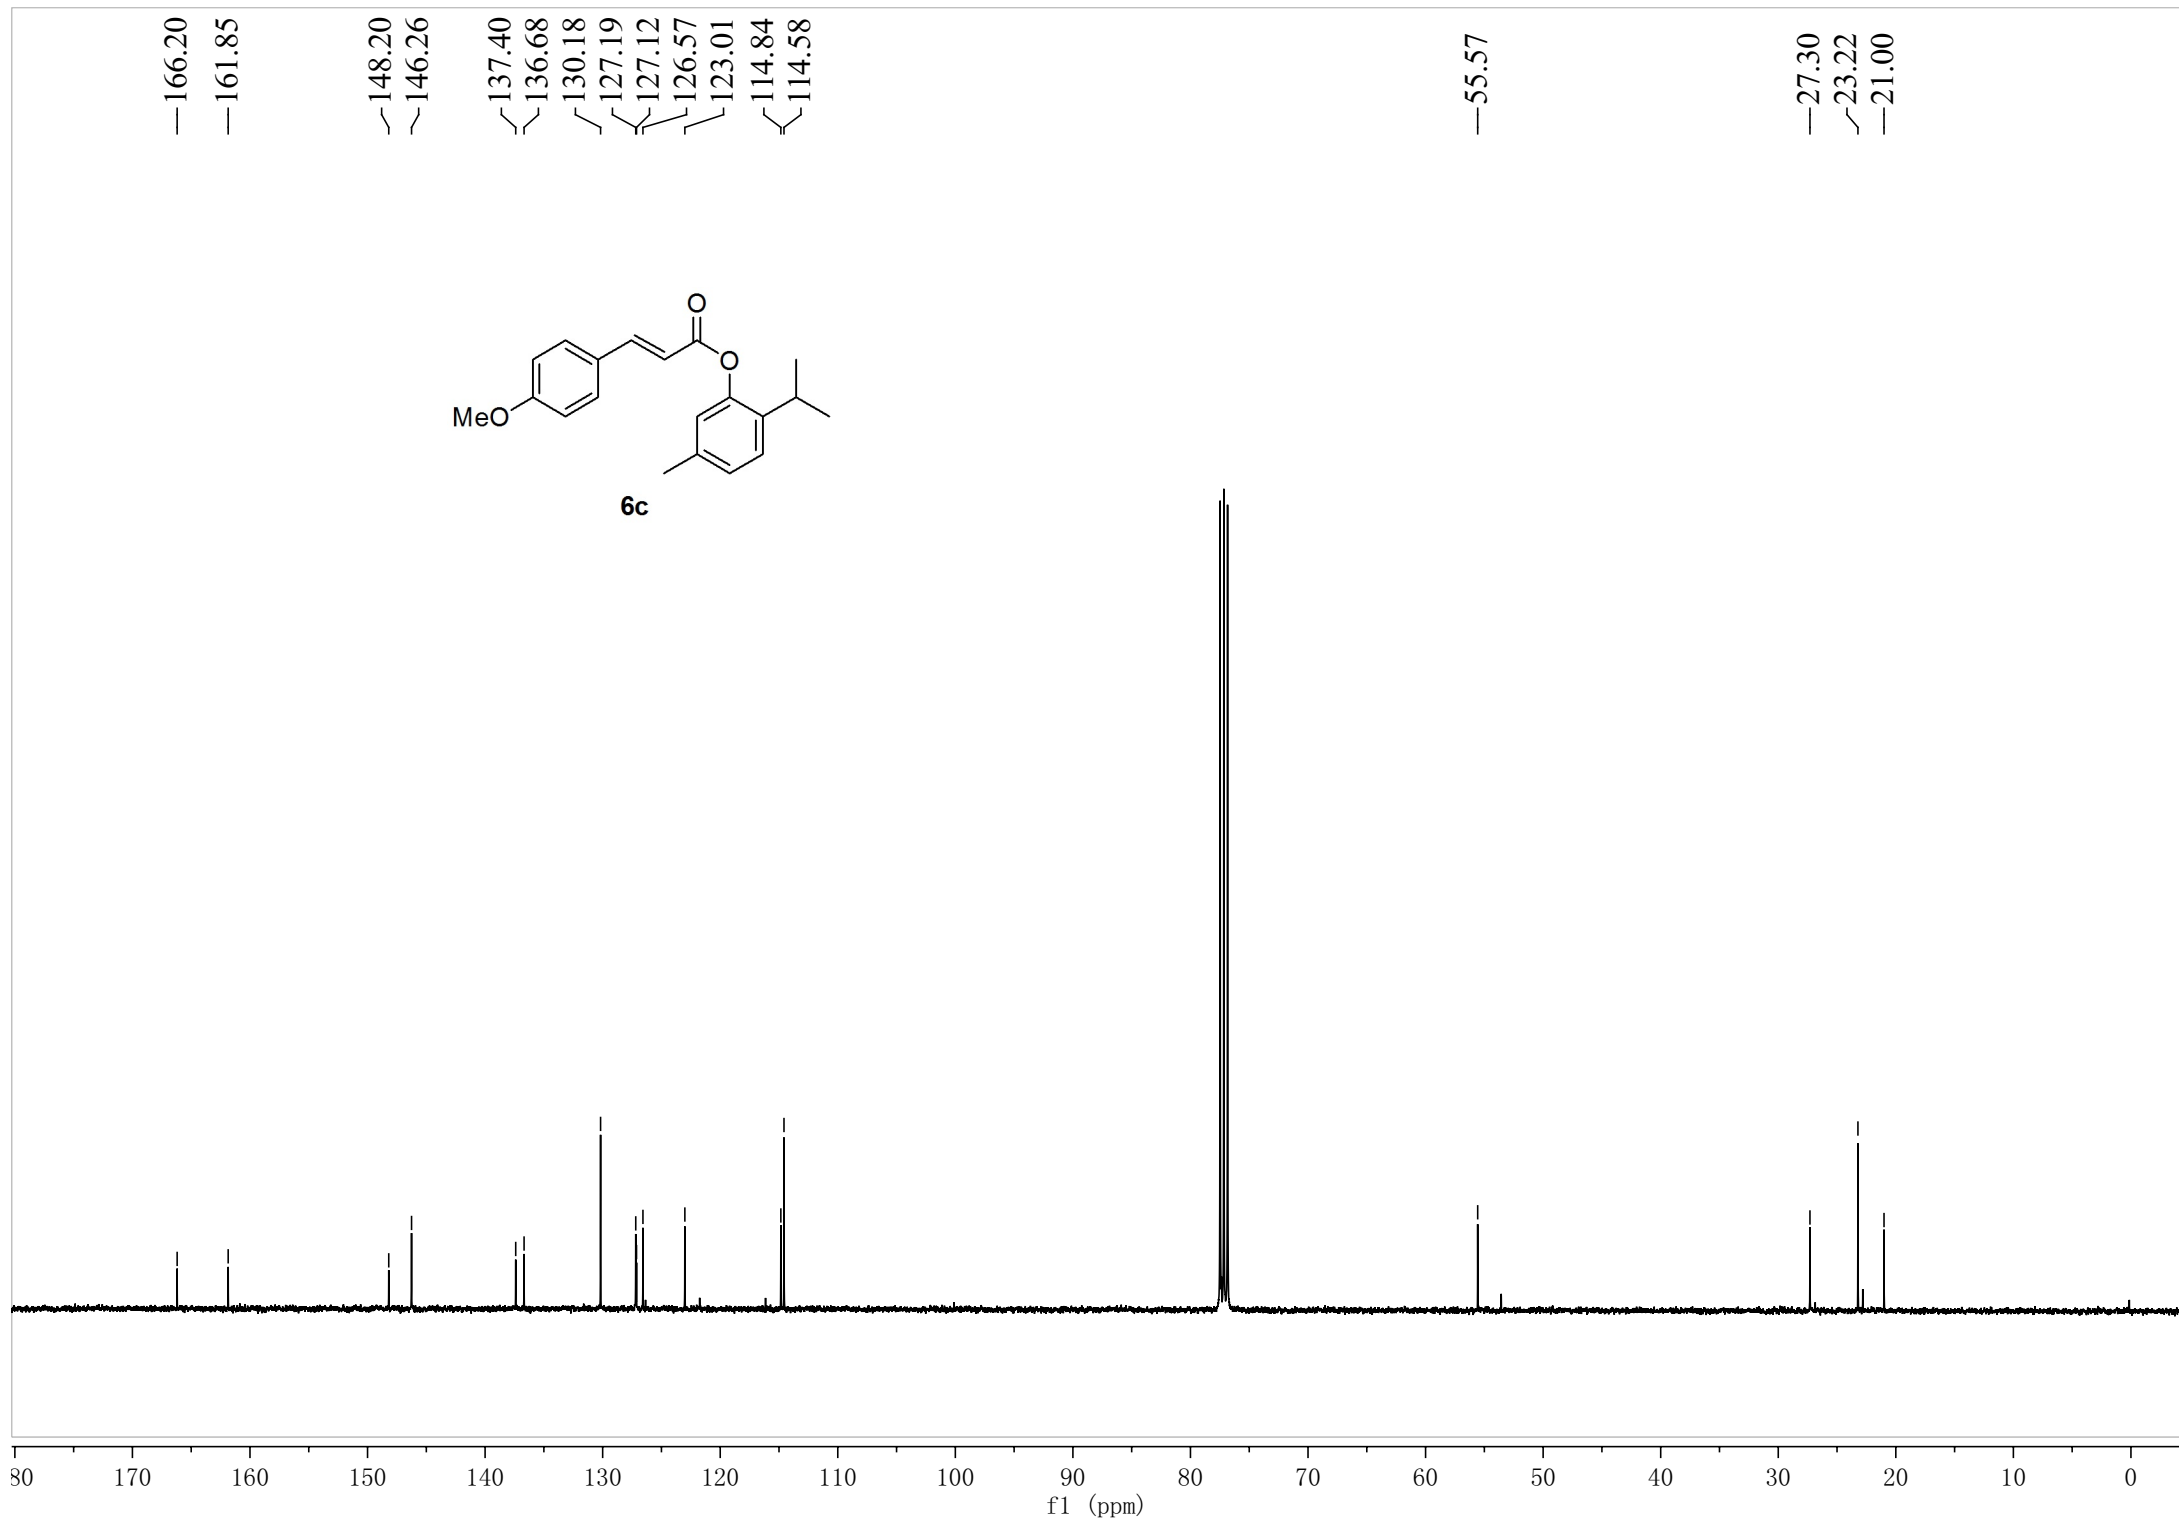



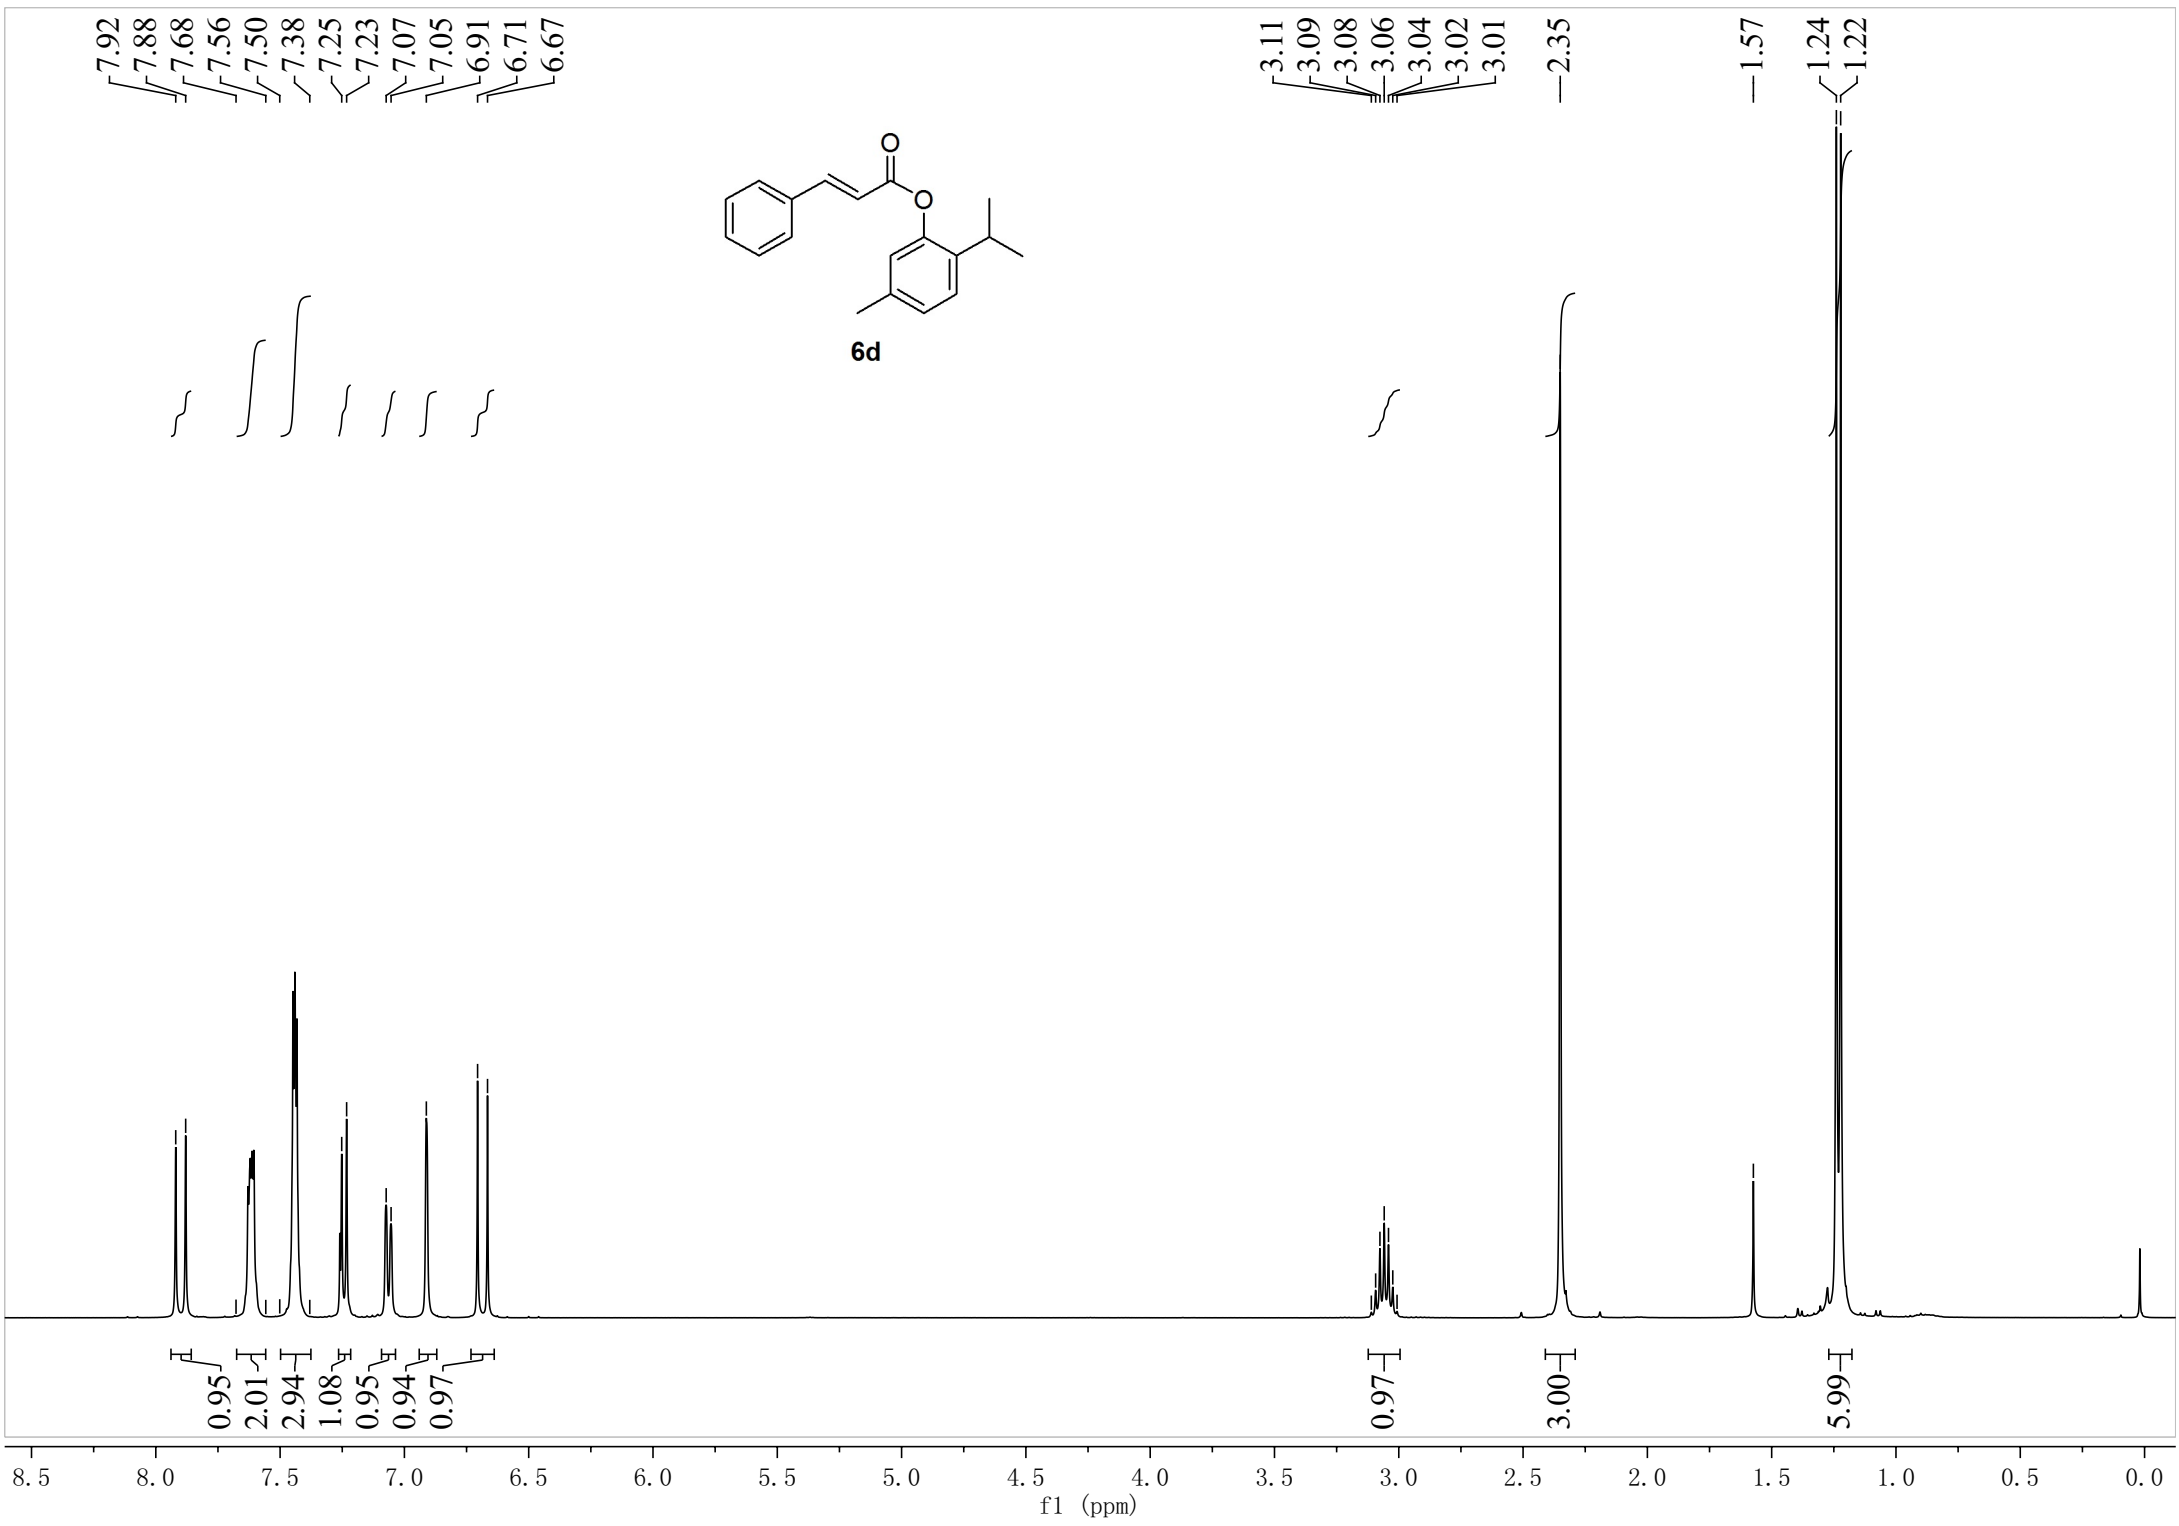

—165.83

~148.09

~146.57

~137.32

~136.71

~134.34

~130.80

~129.12

~128.44

~127.27

~126.60

~122.93

~117.37

—27.31

~23.21

—20.99

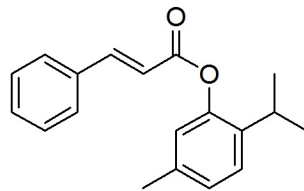

**6d**

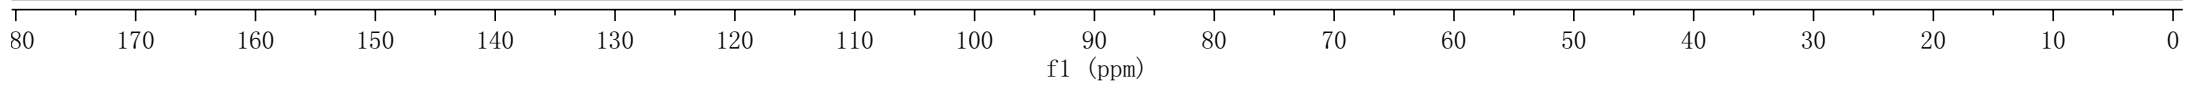

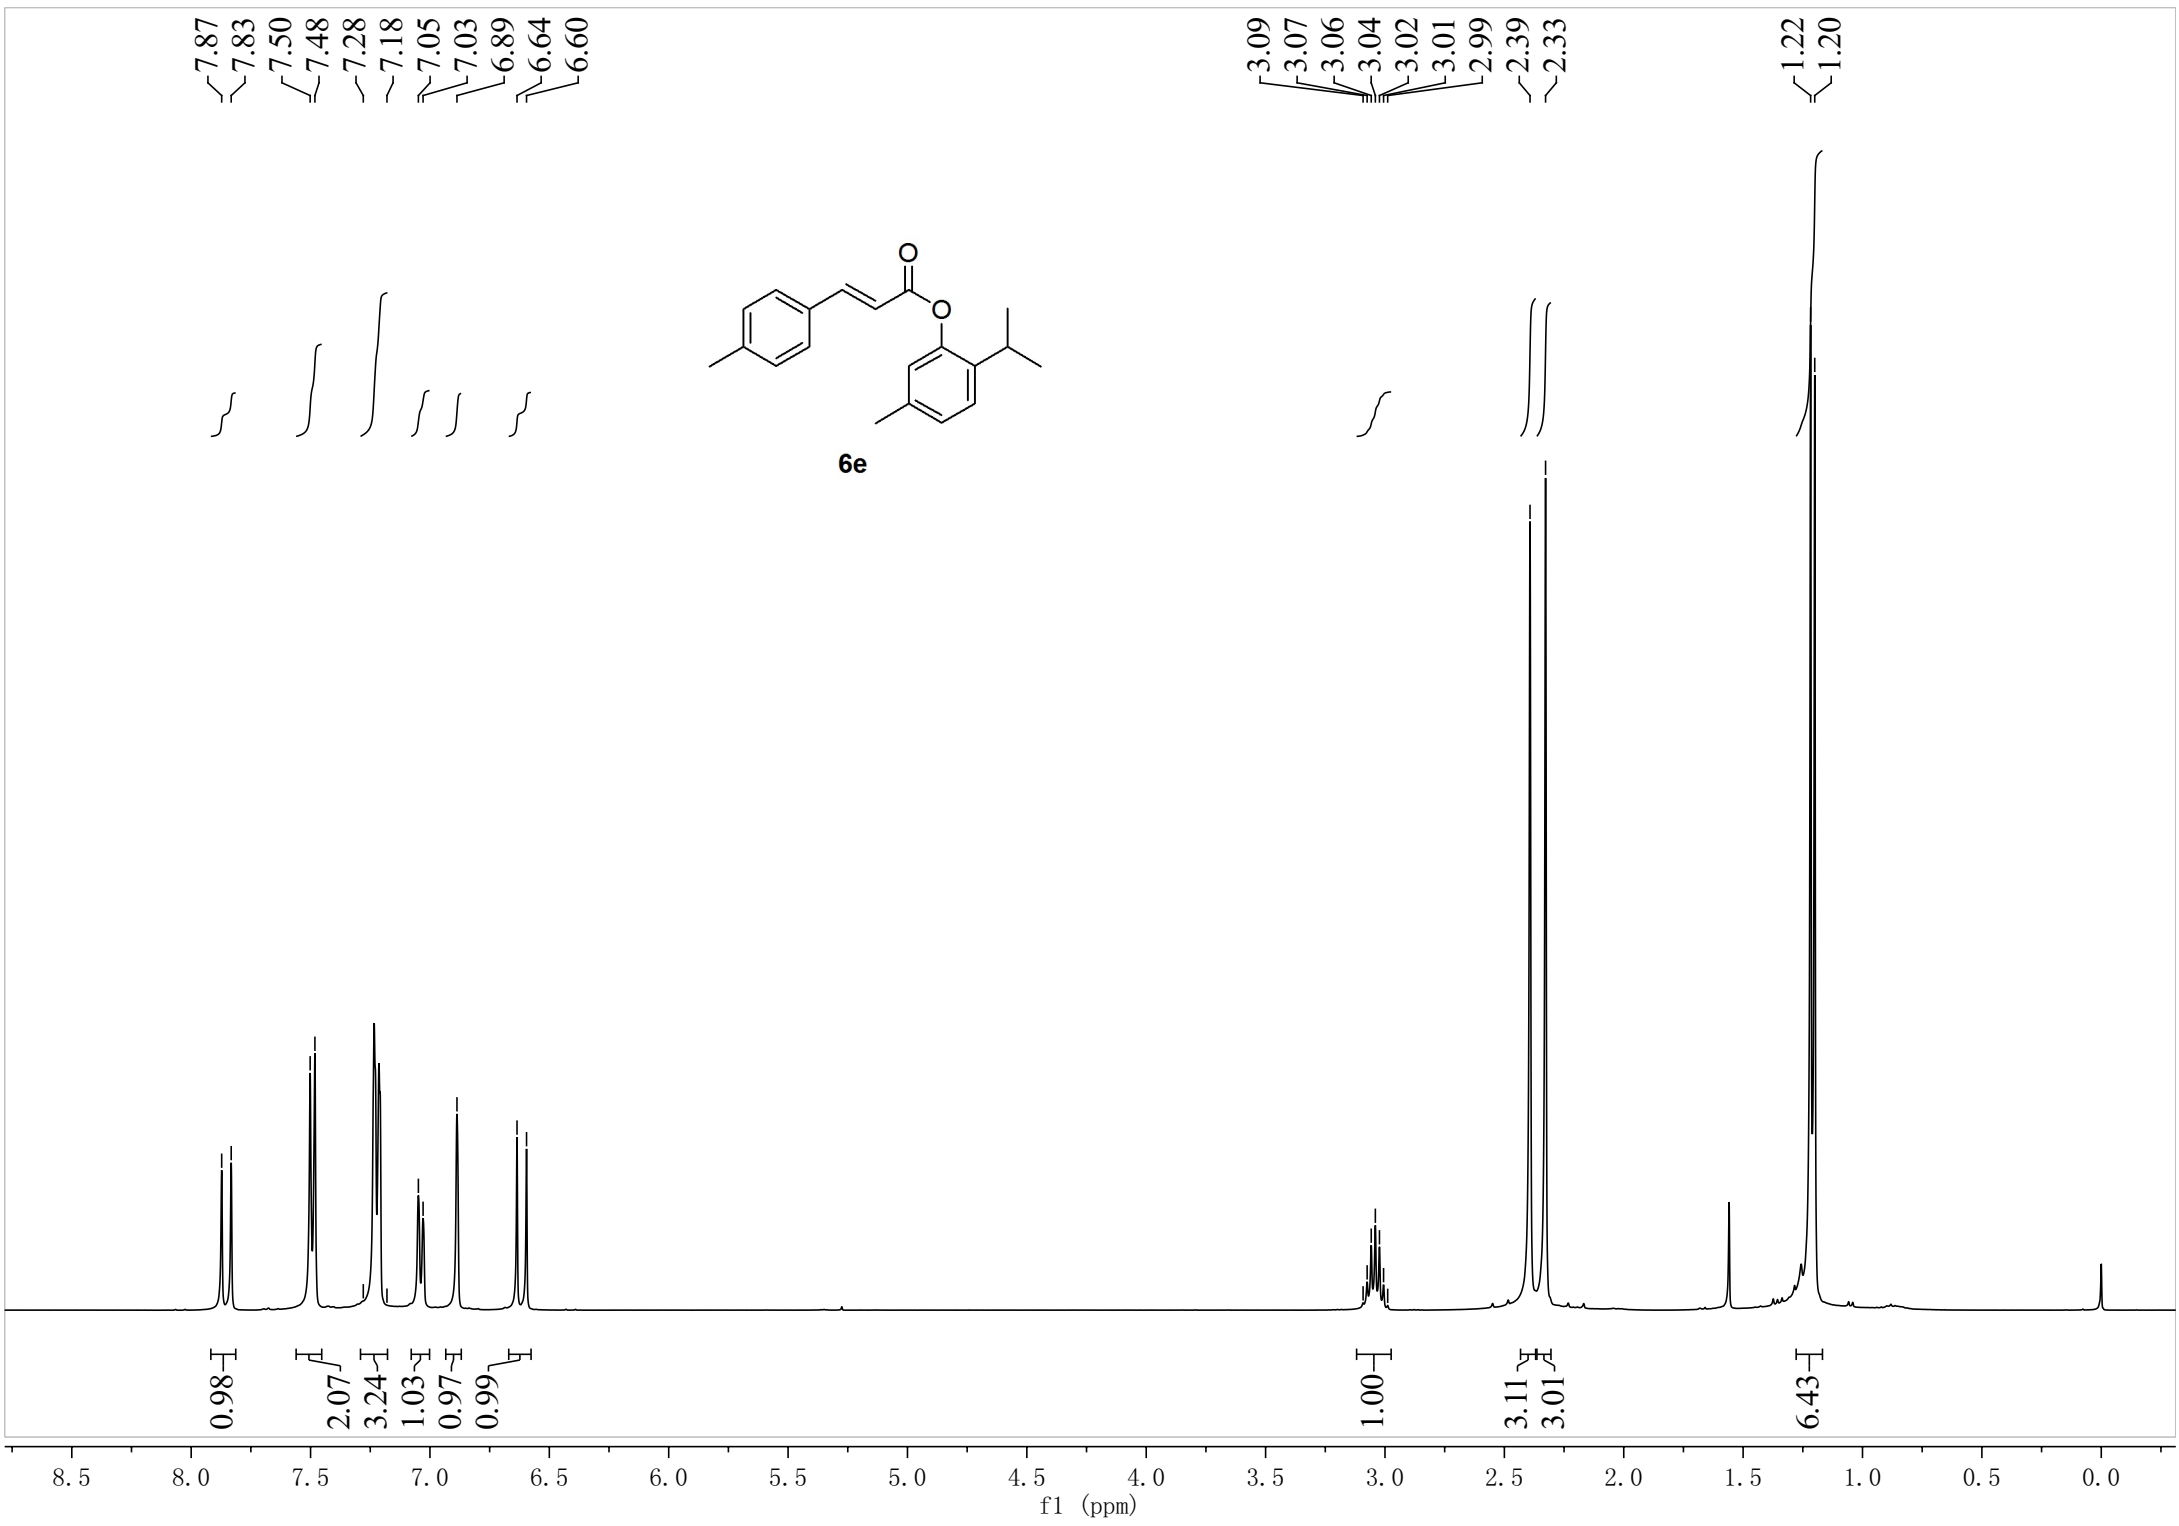

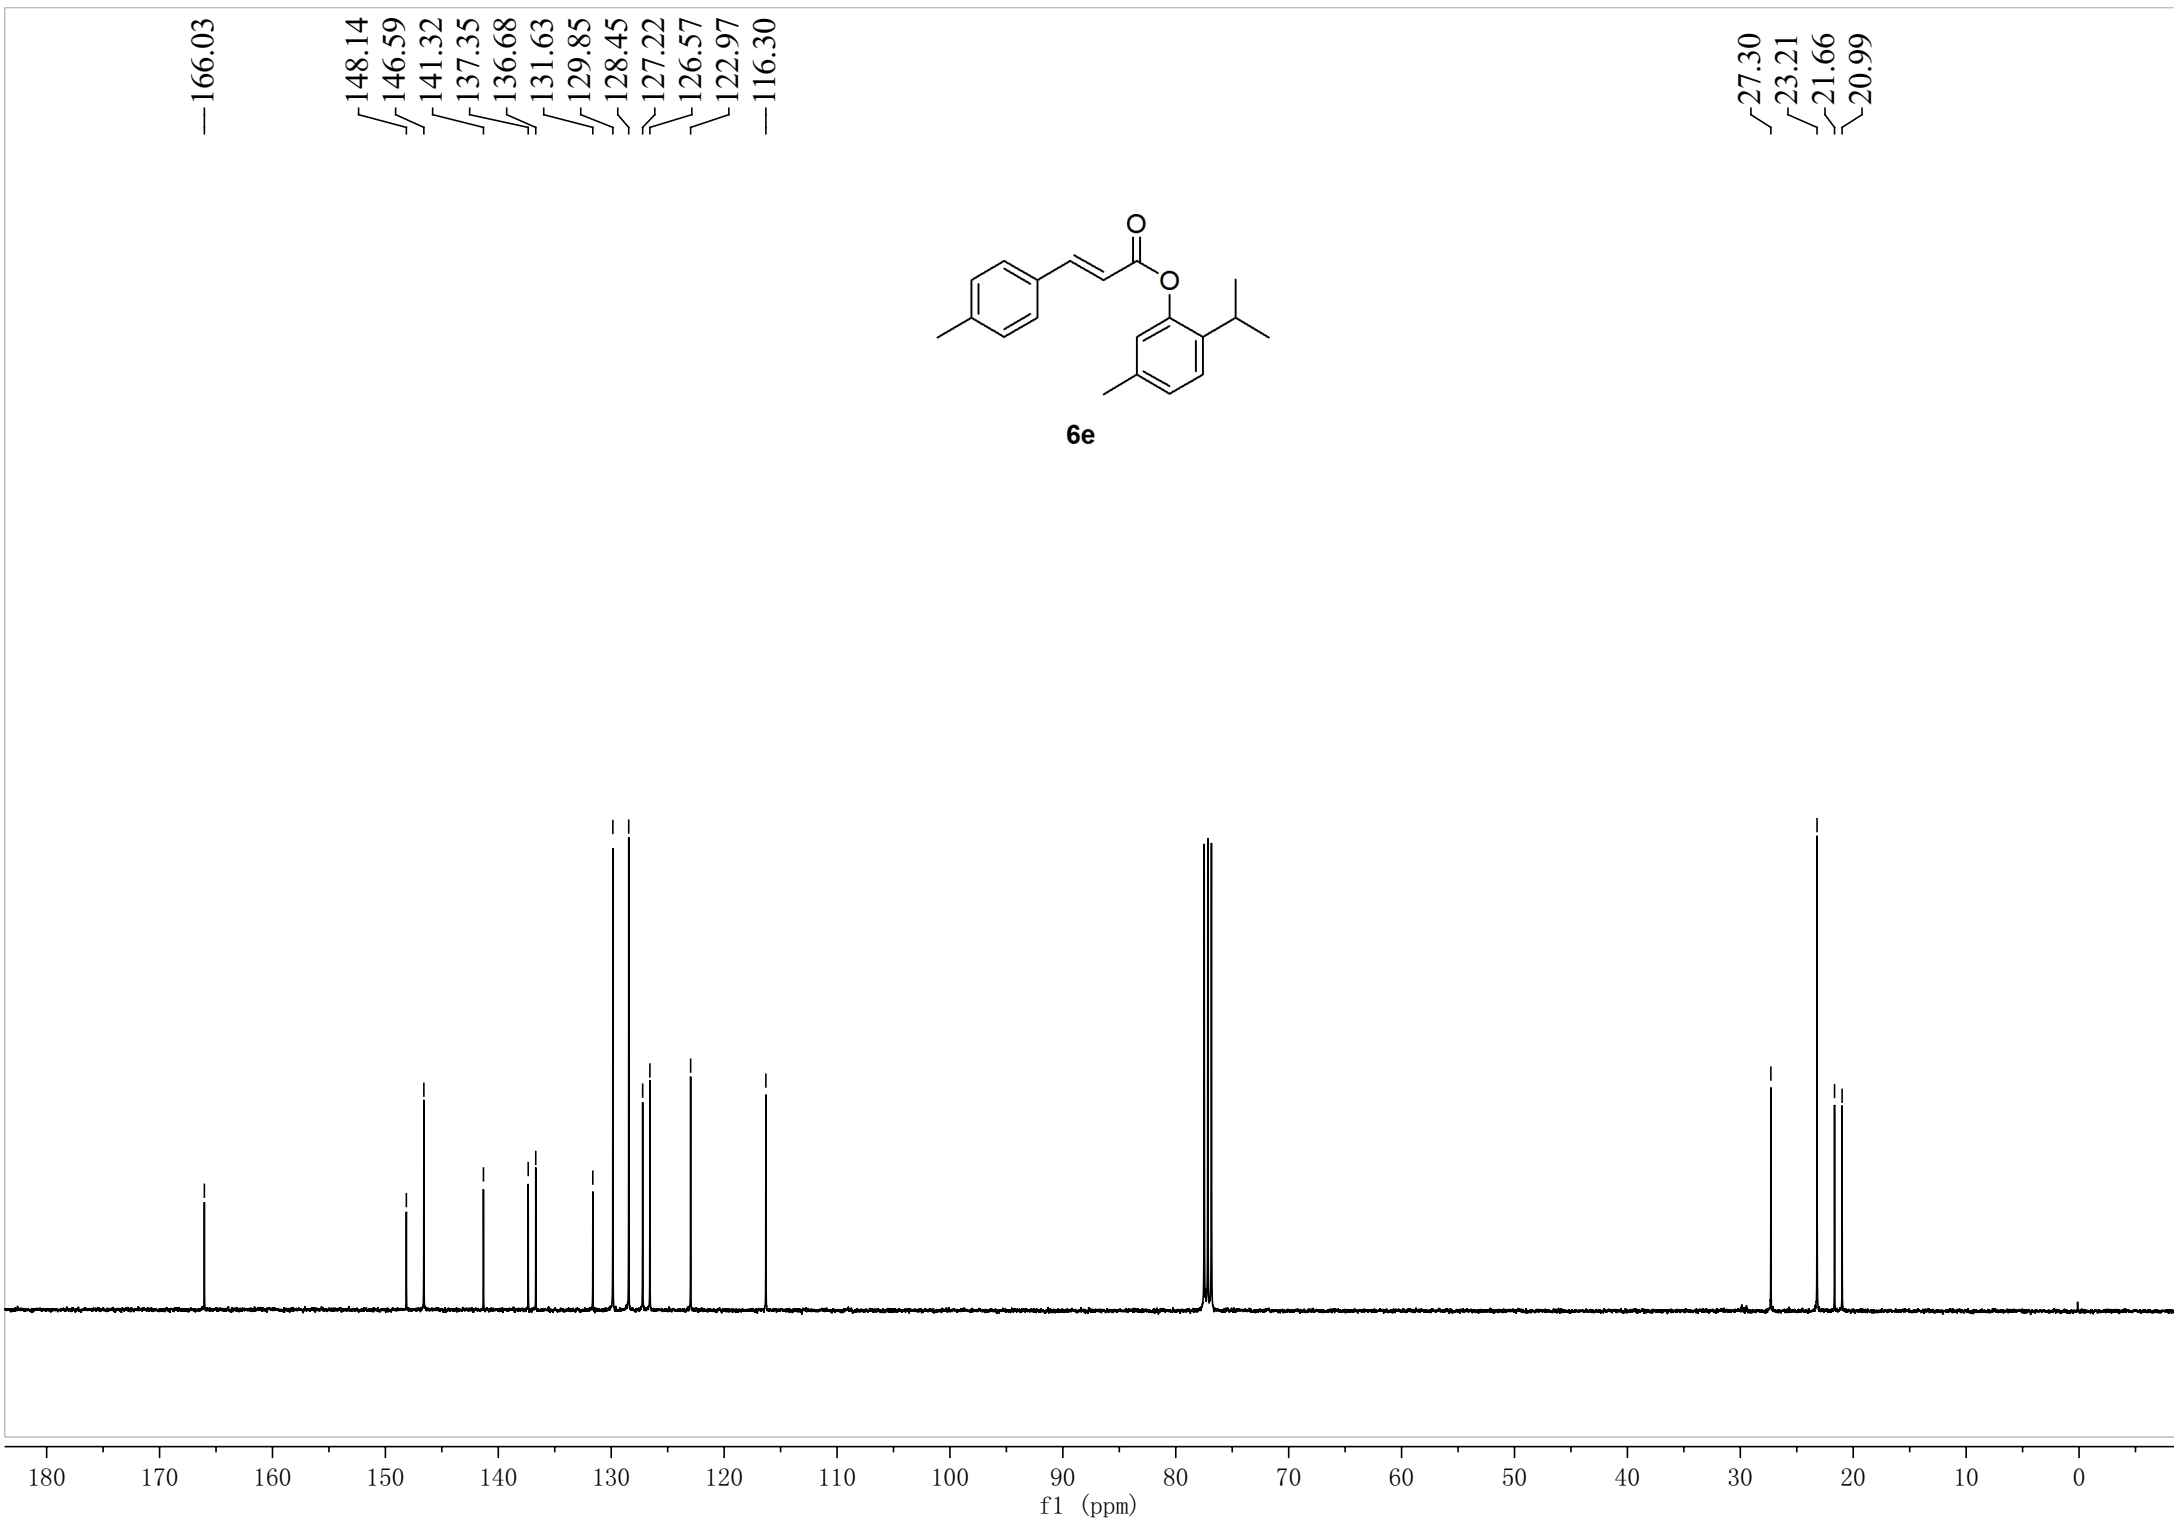

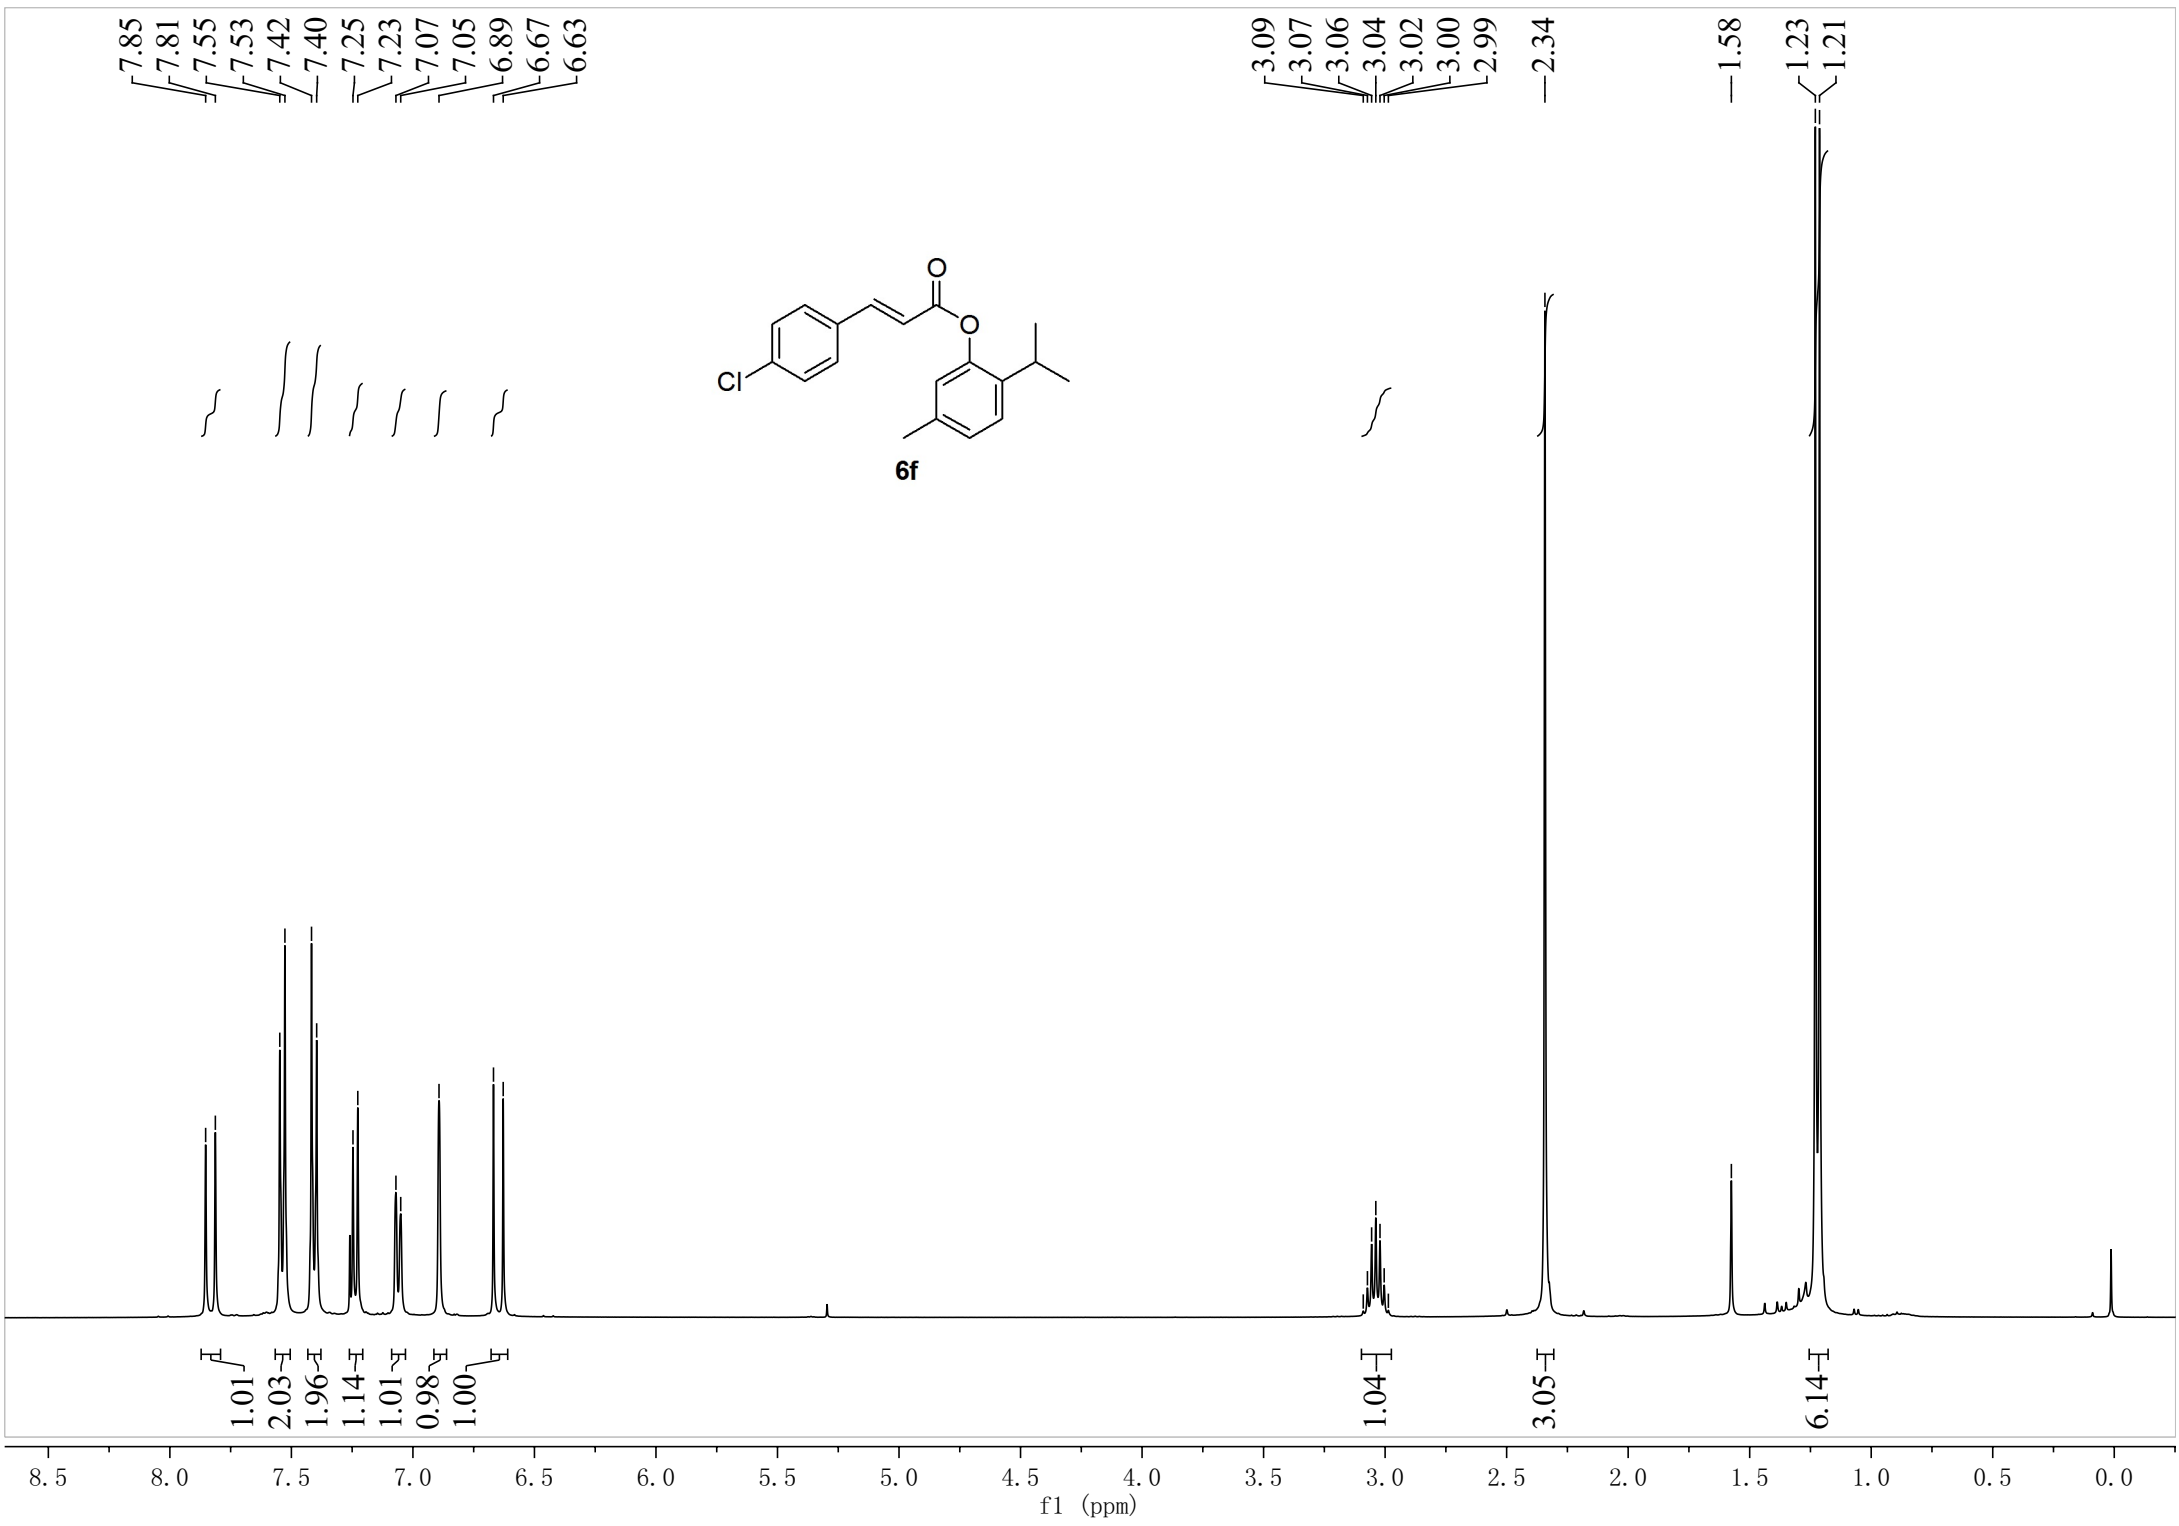

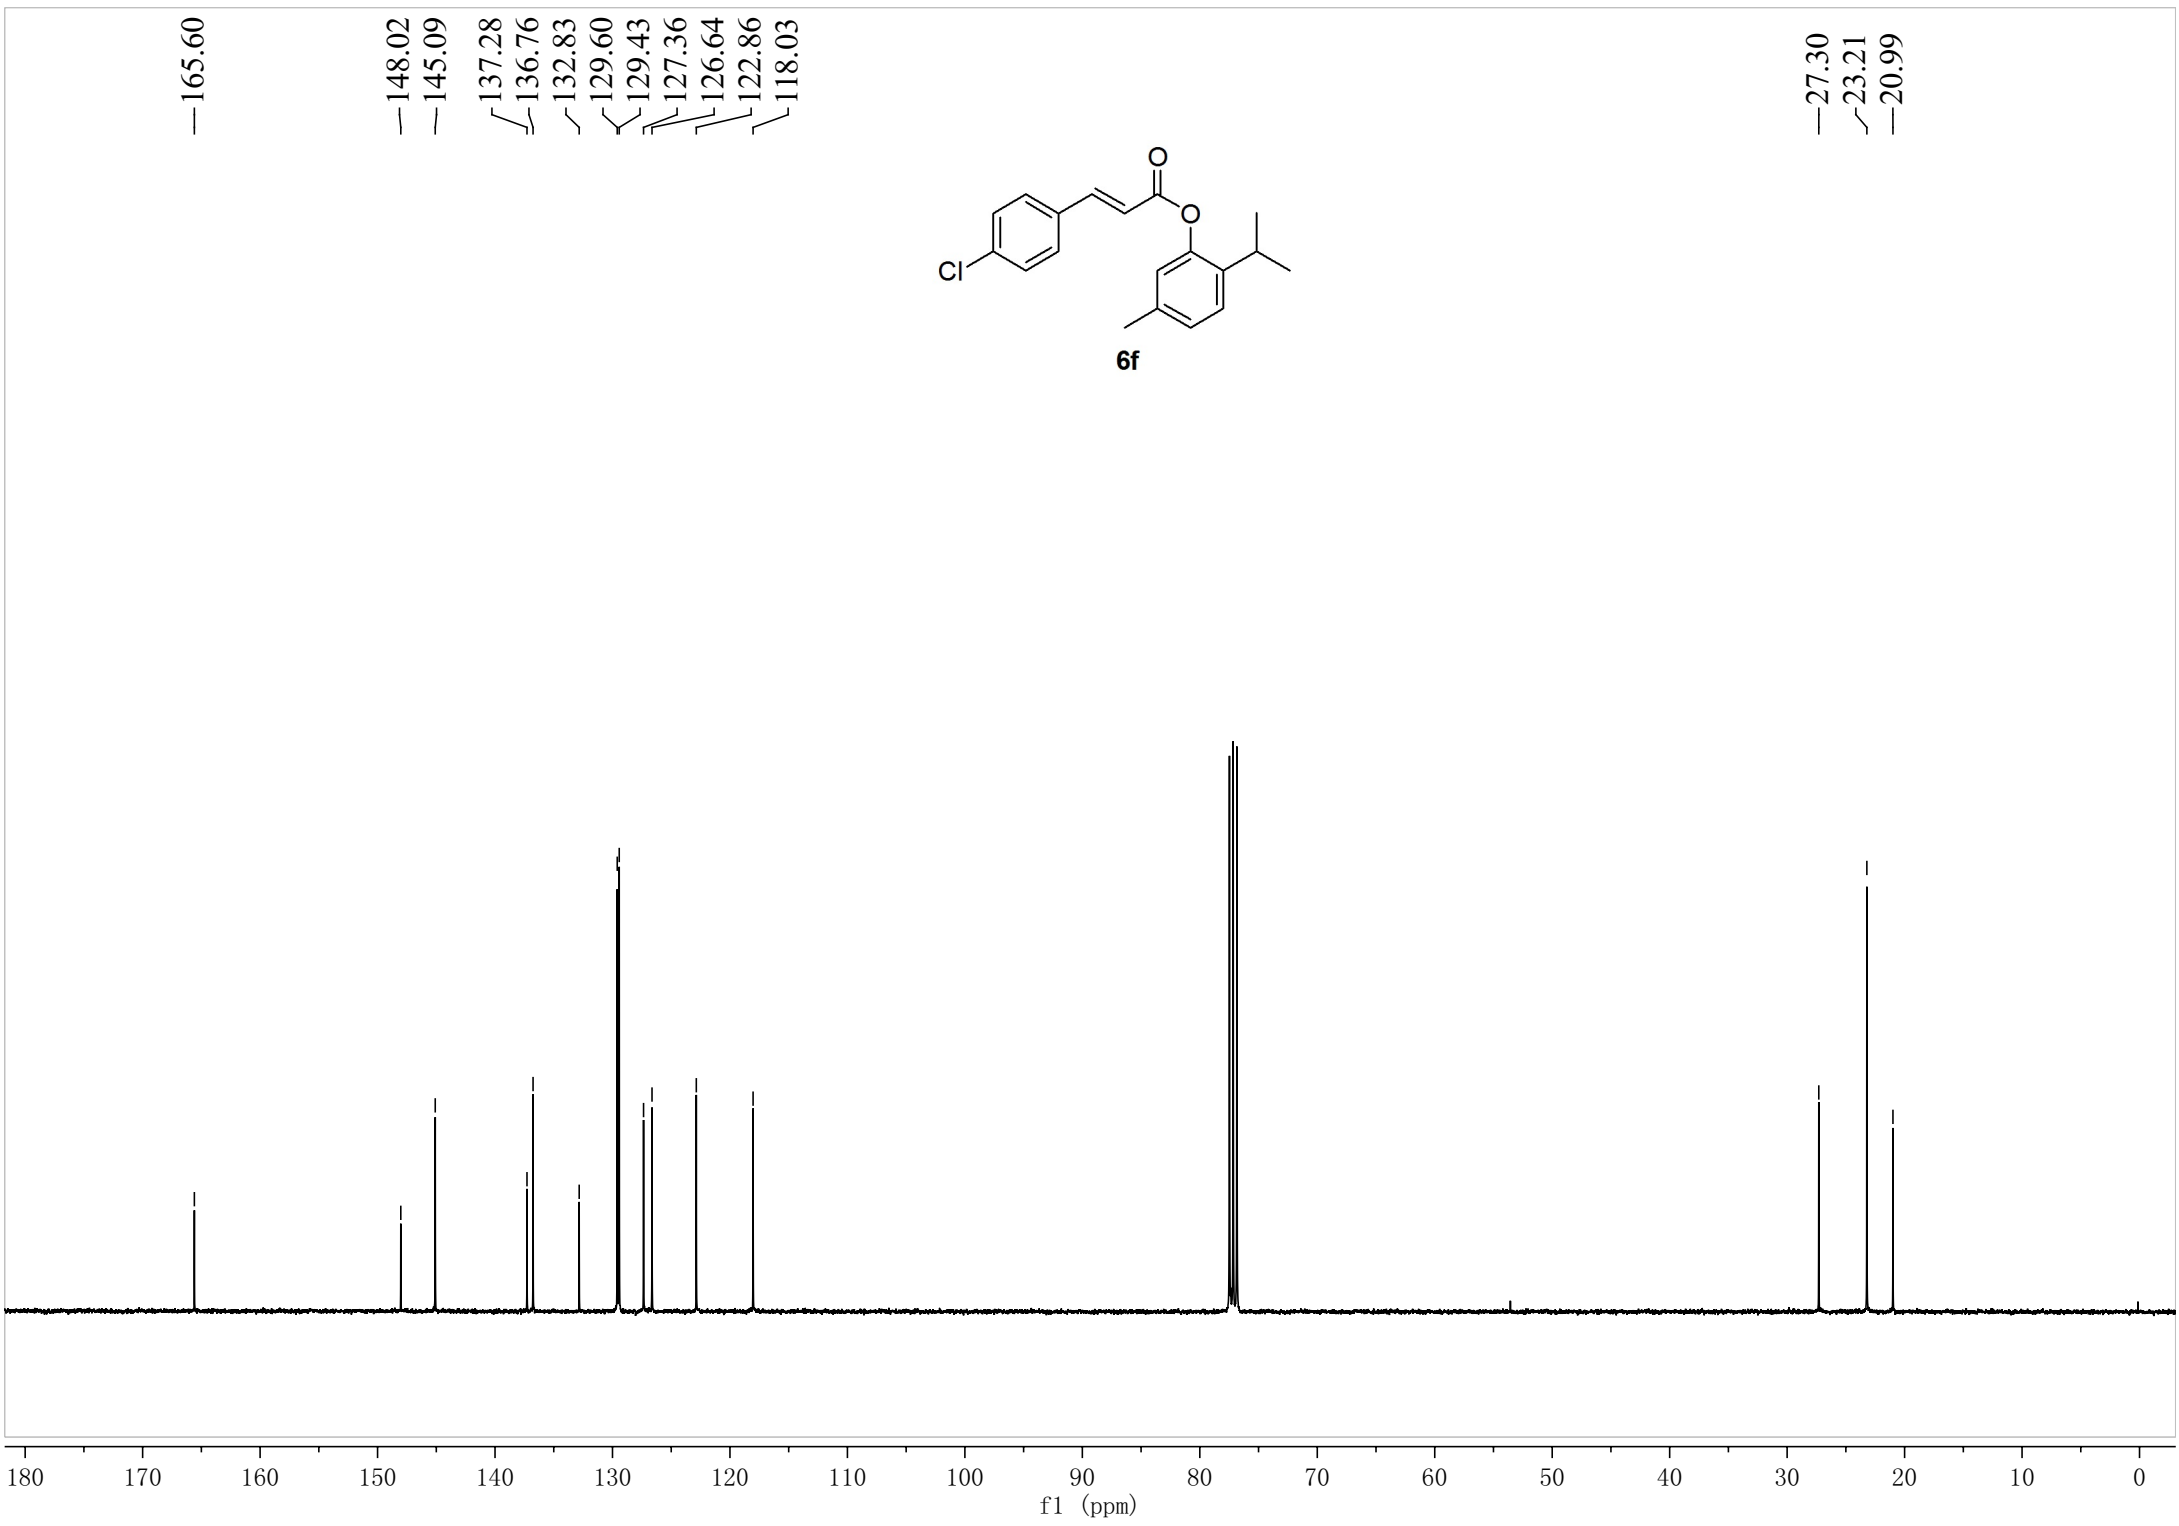

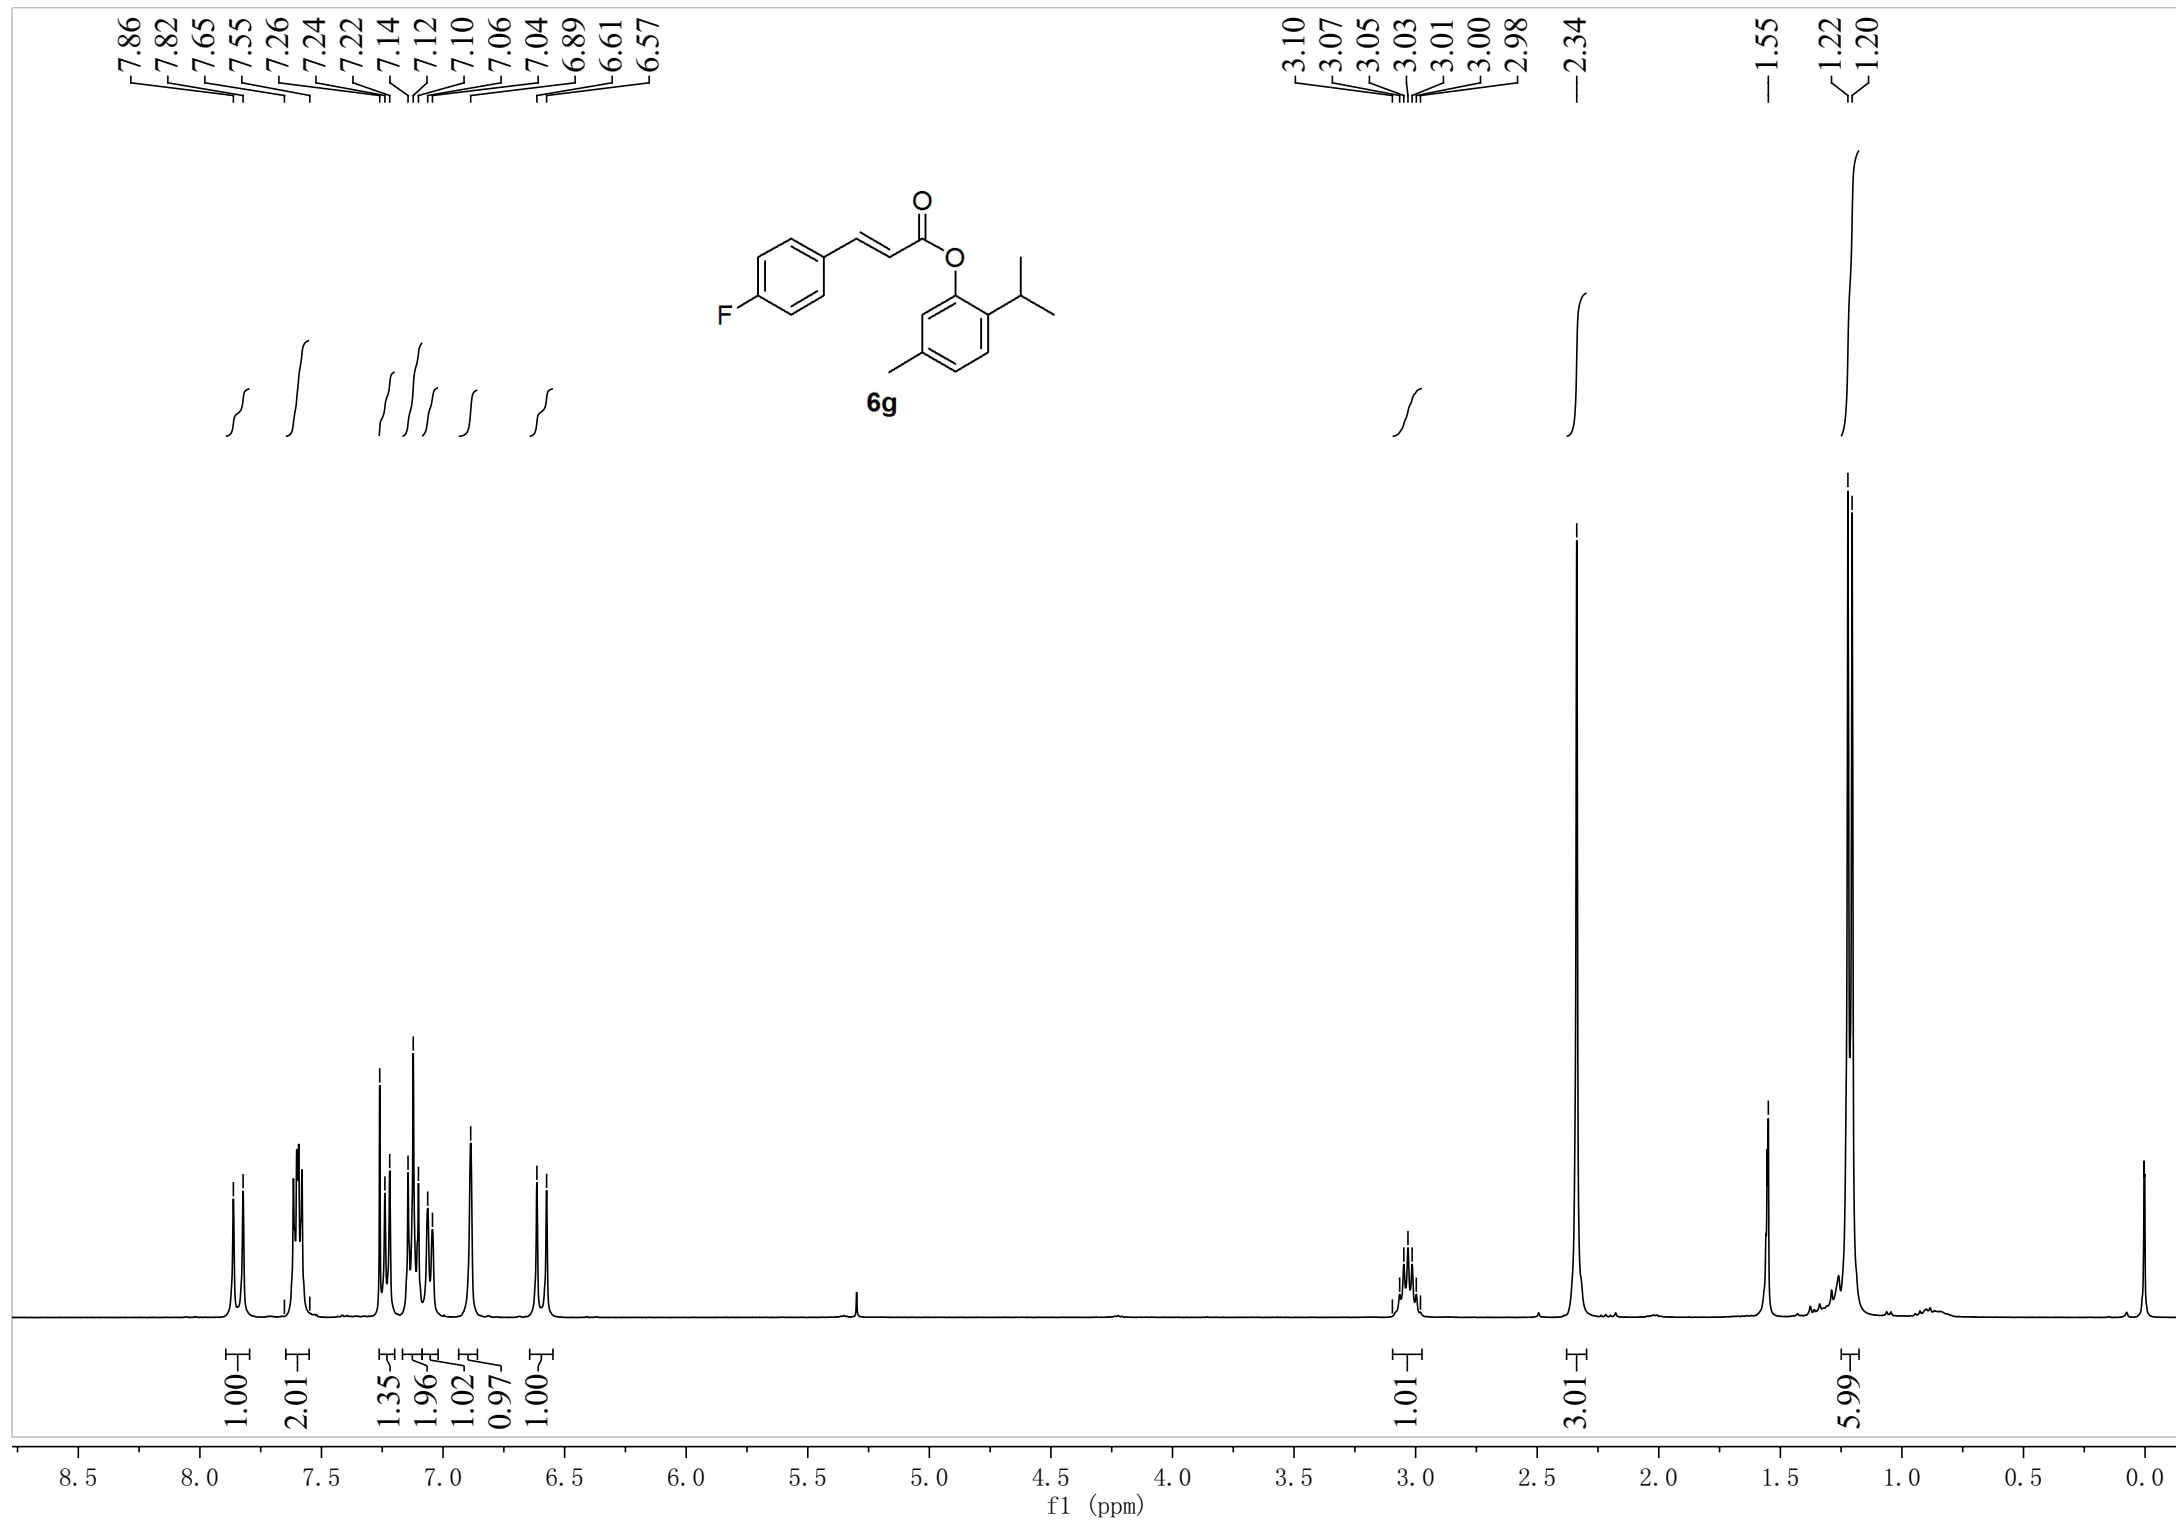

165.72  
165.53  
163.02

148.06  
145.24  
137.30  
136.75  
130.63  
130.60  
130.41  
130.32  
127.32  
126.62  
122.90  
117.21  
117.18  
116.42  
116.20

27.31  
23.21  
20.99

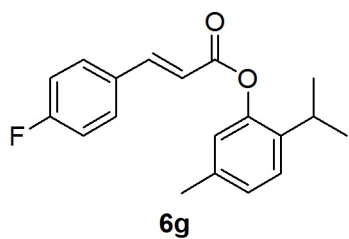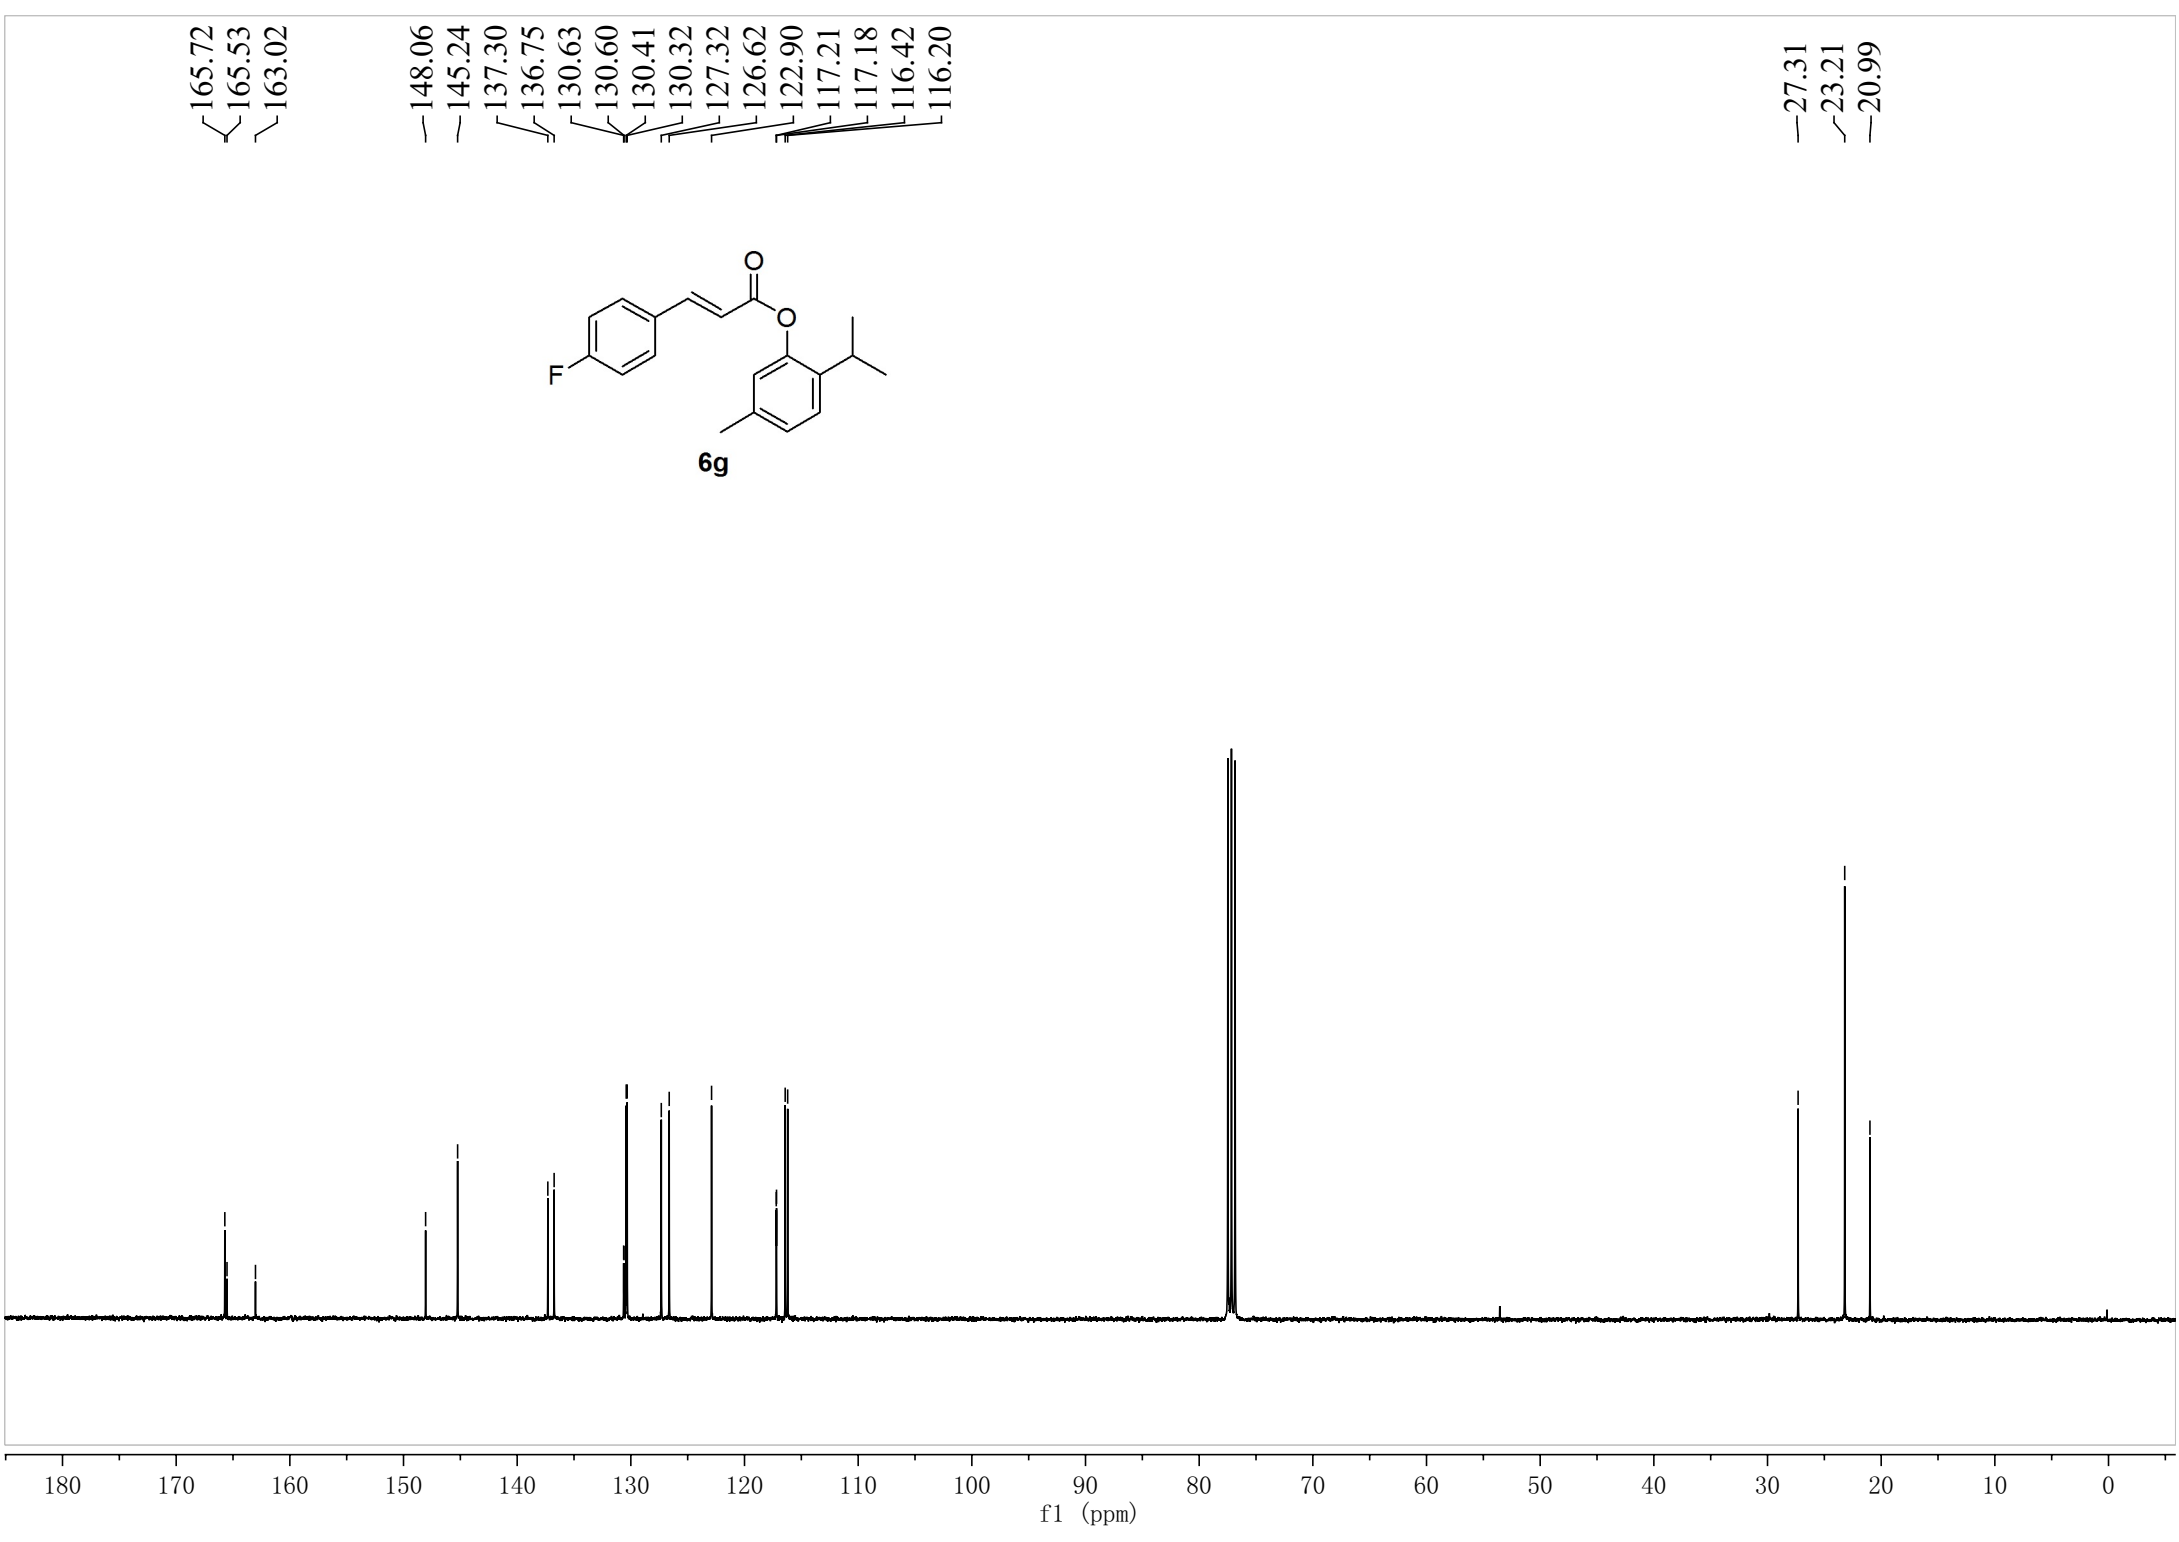

Supplement: MD-009-C8MD00099A-s001.pdf [file MD-009-C8MD00099A-s001.pdf]
